# Supplementary material for: Multidimensional pooled shRNA screens in human THP-1 cells identify candidate modulators of macrophage polarization
Source: PLoS One. 2017 Aug 24;12(8):e0183679. doi: 10.1371/journal.pone.0183679 (PMC5570424; doi:10.1371/journal.pone.0183679)
Supplement: S1 Table — (XLSX) [file pone.0183679.s004.xlsx]

## Sheet: Single cell intensity
Plate	Well	Compound	Concentration (µM)	Primary Ab	Image Number	Object Number	Mean Intensity
1	B15	DMSO	0	CD209	25	1	1.06842
1	B15	DMSO	0	CD209	25	2	1.07132
1	B15	DMSO	0	CD209	25	4	1.06667
1	B15	DMSO	0	CD209	25	5	1.0537
1	B15	DMSO	0	CD209	25	6	1.06512
1	B15	DMSO	0	CD209	25	7	1.0707
1	B15	DMSO	0	CD209	25	8	1.07302
1	B15	DMSO	0	CD209	25	9	1.10834
1	B15	DMSO	0	CD209	25	10	1.05859
1	B15	DMSO	0	CD209	25	11	1.06468
1	B15	DMSO	0	CD209	25	12	1.05239
1	B15	DMSO	0	CD209	25	13	1.06783
1	B15	DMSO	0	CD209	25	14	1.06935
1	B15	DMSO	0	CD209	25	15	1.05009
1	B15	DMSO	0	CD209	25	16	1.0667
1	B15	DMSO	0	CD209	25	17	1.07132
1	B15	DMSO	0	CD209	25	18	1.06417
1	B15	DMSO	0	CD209	25	19	1.05673
1	B15	DMSO	0	CD209	25	20	1.05908
1	B15	DMSO	0	CD209	25	21	1.06125
1	B15	DMSO	0	CD209	25	22	1.05517
1	B15	DMSO	0	CD209	25	23	1.06423
1	B15	DMSO	0	CD209	25	24	1.05654
1	B15	DMSO	0	CD209	25	25	1.08101
1	B15	DMSO	0	CD209	25	26	1.06148
1	B15	DMSO	0	CD209	25	27	1.05797
1	B15	DMSO	0	CD209	25	28	1.07566
1	B15	DMSO	0	CD209	25	29	1.08966
1	B15	DMSO	0	CD209	25	30	1.0558
1	B15	DMSO	0	CD209	25	31	1.06649
1	B15	DMSO	0	CD209	25	32	1.0984
1	B15	DMSO	0	CD209	25	33	1.06141
1	B15	DMSO	0	CD209	25	35	1.06965
1	B15	DMSO	0	CD209	25	36	1.06751
1	B15	DMSO	0	CD209	25	37	1.07823
1	B15	DMSO	0	CD209	25	38	1.06527
1	B15	DMSO	0	CD209	25	39	1.05761
1	B15	DMSO	0	CD209	25	40	1.05822
1	B15	DMSO	0	CD209	25	41	1.06785
1	B15	DMSO	0	CD209	25	42	1.07
1	B15	DMSO	0	CD209	25	43	1.08266
1	B15	DMSO	0	CD209	25	44	1.06125
1	B15	DMSO	0	CD209	25	45	1.06408
1	B15	DMSO	0	CD209	25	46	1.06702
1	B15	DMSO	0	CD209	25	47	1.06345
1	B15	DMSO	0	CD209	25	48	1.05921
1	B15	DMSO	0	CD209	25	49	1.06121
1	B15	DMSO	0	CD209	25	50	1.0612
1	B15	DMSO	0	CD209	25	51	1.06786
1	B15	DMSO	0	CD209	25	52	1.06828
1	B15	DMSO	0	CD209	25	53	1.0591
1	B15	DMSO	0	CD209	25	54	1.06304
1	B15	DMSO	0	CD209	25	55	1.10657
1	B15	DMSO	0	CD209	25	56	1.07397
1	B15	DMSO	0	CD209	25	57	1.05373
1	B15	DMSO	0	CD209	25	58	1.06355
1	B15	DMSO	0	CD209	25	59	1.08536
1	B15	DMSO	0	CD209	25	60	1.06716
1	B15	DMSO	0	CD209	25	61	1.06327
1	B15	DMSO	0	CD209	25	62	1.06456
1	B15	DMSO	0	CD209	25	63	1.09883
1	B15	DMSO	0	CD209	25	64	1.19368
1	B15	DMSO	0	CD209	25	65	1.07041
1	B15	DMSO	0	CD209	25	66	1.06093
1	B15	DMSO	0	CD209	25	67	1.06127
1	B15	DMSO	0	CD209	25	68	1.0809
1	B15	DMSO	0	CD209	25	69	1.06049
1	B15	DMSO	0	CD209	25	70	1.06331
1	B15	DMSO	0	CD209	25	71	1.0594
1	B15	DMSO	0	CD209	25	72	1.05219
1	B15	DMSO	0	CD209	25	73	1.07278
1	B15	DMSO	0	CD209	25	74	1.07196
1	B15	DMSO	0	CD209	25	75	1.25665
1	B15	DMSO	0	CD209	25	76	1.06566
1	B15	DMSO	0	CD209	25	77	1.05592
1	B15	DMSO	0	CD209	25	78	1.06071
1	B15	DMSO	0	CD209	25	79	1.2169
1	B15	DMSO	0	CD209	25	80	1.08818
1	B15	DMSO	0	CD209	25	81	1.06215
1	B15	DMSO	0	CD209	25	82	1.05519
1	B15	DMSO	0	CD209	25	83	1.05858
1	B15	DMSO	0	CD209	25	84	1.0586
1	B15	DMSO	0	CD209	25	85	1.06715
1	B15	DMSO	0	CD209	25	86	1.05923
1	B15	DMSO	0	CD209	25	87	1.07953
1	B15	DMSO	0	CD209	25	88	1.06345
1	B15	DMSO	0	CD209	25	89	1.05219
1	B15	DMSO	0	CD209	25	90	1.07528
1	B15	DMSO	0	CD209	25	91	1.05942
1	B15	DMSO	0	CD209	25	92	1.07624
1	B15	DMSO	0	CD209	25	93	1.10203
1	B15	DMSO	0	CD209	25	94	1.05391
1	B15	DMSO	0	CD209	25	95	1.07387
1	B15	DMSO	0	CD209	25	96	1.05811
1	B15	DMSO	0	CD209	25	97	1.06704
1	B15	DMSO	0	CD209	25	98	1.05176
1	B15	DMSO	0	CD209	25	99	1.21812
1	B15	DMSO	0	CD209	25	100	1.0672
1	B15	DMSO	0	CD209	25	101	1.07871
1	B15	DMSO	0	CD209	25	102	1.06796
1	B15	DMSO	0	CD209	25	103	1.06901
1	B15	DMSO	0	CD209	25	104	1.06702
1	B15	DMSO	0	CD209	25	105	1.05893
1	B15	DMSO	0	CD209	25	106	1.06058
1	B15	DMSO	0	CD209	25	107	1.0613
1	B15	DMSO	0	CD209	25	108	1.19893
1	B15	DMSO	0	CD209	25	109	1.05812
1	B15	DMSO	0	CD209	25	110	1.0607
1	B15	DMSO	0	CD209	25	111	1.06982
1	B15	DMSO	0	CD209	25	112	1.06139
1	B15	DMSO	0	CD209	25	113	1.05747
1	B15	DMSO	0	CD209	25	114	1.05847
1	B15	DMSO	0	CD209	25	115	1.07626
1	B15	DMSO	0	CD209	25	116	1.06907
1	B15	DMSO	0	CD209	25	117	1.0542
1	B15	DMSO	0	CD209	25	118	1.07348
1	B15	DMSO	0	CD209	25	119	1.0751
1	B15	DMSO	0	CD209	25	120	1.05729
1	B15	DMSO	0	CD209	25	121	1.06459
1	B15	DMSO	0	CD209	25	122	1.06105
1	B15	DMSO	0	CD209	25	123	1.06337
1	B15	DMSO	0	CD209	25	124	1.07999
1	B15	DMSO	0	CD209	25	125	1.0884
1	B15	DMSO	0	CD209	25	126	1.07016
1	B15	DMSO	0	CD209	25	127	1.06515
1	B15	DMSO	0	CD209	25	128	1.07387
1	B15	DMSO	0	CD209	25	129	1.07148
1	B15	DMSO	0	CD209	25	130	1.06884
1	B15	DMSO	0	CD209	25	131	1.07043
1	B15	DMSO	0	CD209	25	132	1.07611
1	B15	DMSO	0	CD209	25	133	1.07149
1	B15	DMSO	0	CD209	25	134	1.05637
1	B15	DMSO	0	CD209	25	135	1.05782
1	B15	DMSO	0	CD209	25	136	1.06185
1	B15	DMSO	0	CD209	25	137	1.08699
1	B15	DMSO	0	CD209	25	138	1.06243
1	B15	DMSO	0	CD209	25	139	1.06455
1	B15	DMSO	0	CD209	25	140	1.07602
1	B15	DMSO	0	CD209	25	141	1.15696
1	B15	DMSO	0	CD209	25	142	1.11693
1	B15	DMSO	0	CD209	25	143	1.06317
1	B15	DMSO	0	CD209	25	144	1.07261
1	B15	DMSO	0	CD209	25	145	1.06699
1	B15	DMSO	0	CD209	25	146	1.06549
1	B15	DMSO	0	CD209	25	147	1.06147
1	B15	DMSO	0	CD209	25	148	1.06624
1	B15	DMSO	0	CD209	25	149	1.07029
1	B15	DMSO	0	CD209	25	150	1.06297
1	B15	DMSO	0	CD209	25	151	1.09679
1	B15	DMSO	0	CD209	25	152	1.06184
1	B15	DMSO	0	CD209	25	153	1.051
1	B15	DMSO	0	CD209	25	154	1.06998
1	B15	DMSO	0	CD209	25	155	1.13927
1	B15	DMSO	0	CD209	25	156	1.05606
1	B15	DMSO	0	CD209	25	157	1.05616
1	B15	DMSO	0	CD209	25	158	1.06502
1	B15	DMSO	0	CD209	25	159	1.06648
1	B15	DMSO	0	CD209	25	160	1.11602
1	B15	DMSO	0	CD209	25	161	1.08422
1	B15	DMSO	0	CD209	25	162	1.06394
1	B15	DMSO	0	CD209	25	163	1.066
1	B15	DMSO	0	CD209	25	164	1.11377
1	B15	DMSO	0	CD209	25	165	1.05694
1	B15	DMSO	0	CD209	25	166	1.05676
1	B15	DMSO	0	CD209	25	167	1.0881
1	B15	DMSO	0	CD209	25	168	1.08233
1	B15	DMSO	0	CD209	25	169	1.06243
1	B15	DMSO	0	CD209	25	170	1.0511
1	B15	DMSO	0	CD209	25	171	1.06901
1	B15	DMSO	0	CD209	25	172	1.0602
1	B15	DMSO	0	CD209	25	173	1.10505
1	B15	DMSO	0	CD209	25	174	1.06112
1	B15	DMSO	0	CD209	25	175	1.0553
1	B15	DMSO	0	CD209	25	176	1.06869
1	B15	DMSO	0	CD209	25	177	1.05971
1	B15	DMSO	0	CD209	25	178	1.07842
1	B15	DMSO	0	CD209	25	179	1.10172
1	B15	DMSO	0	CD209	25	180	1.06661
1	B15	DMSO	0	CD209	25	181	1.13569
1	B15	DMSO	0	CD209	25	182	1.05689
1	B15	DMSO	0	CD209	25	183	1.11089
1	B15	DMSO	0	CD209	25	184	1.09494
1	B15	DMSO	0	CD209	25	185	1.05976
1	B15	DMSO	0	CD209	25	186	1.07454
1	B15	DMSO	0	CD209	25	187	1.06552
1	B15	DMSO	0	CD209	25	188	1.06133
1	B15	DMSO	0	CD209	25	189	1.17892
1	B15	DMSO	0	CD209	25	190	1.09589
1	B15	DMSO	0	CD209	25	191	1.06207
1	B15	DMSO	0	CD209	25	192	1.06073
1	B15	DMSO	0	CD209	25	193	1.11392
1	B15	DMSO	0	CD209	25	194	1.06186
1	B15	DMSO	0	CD209	25	195	1.06734
1	B15	DMSO	0	CD209	25	196	1.06274
1	B15	DMSO	0	CD209	25	197	1.05869
1	B15	DMSO	0	CD209	25	198	1.05351
1	B15	DMSO	0	CD209	25	199	1.06315
1	B15	DMSO	0	CD209	25	200	1.06357
1	B15	DMSO	0	CD209	25	201	1.05669
1	B15	DMSO	0	CD209	25	202	1.05933
1	B15	DMSO	0	CD209	25	203	1.06383
1	B15	DMSO	0	CD209	25	204	1.07582
1	B15	DMSO	0	CD209	25	205	1.07013
1	B15	DMSO	0	CD209	25	206	1.05836
1	B15	DMSO	0	CD209	25	207	1.15079
1	B15	DMSO	0	CD209	25	208	1.07101
1	B15	DMSO	0	CD209	25	209	1.06092
1	B15	DMSO	0	CD209	25	210	1.07045
1	B15	DMSO	0	CD209	25	211	1.12201
1	B15	DMSO	0	CD209	25	212	1.0727
1	B15	DMSO	0	CD209	25	213	1.06249
1	B15	DMSO	0	CD209	25	214	1.06732
1	B15	DMSO	0	CD209	25	215	1.24918
1	B15	DMSO	0	CD209	25	216	1.07869
1	B15	DMSO	0	CD209	25	217	1.06097
1	B15	DMSO	0	CD209	25	218	1.05984
1	B15	DMSO	0	CD209	25	219	1.05029
1	B15	DMSO	0	CD209	25	220	1.05615
1	B15	DMSO	0	CD209	25	221	1.06123
1	B15	DMSO	0	CD209	25	222	1.0593
1	B15	DMSO	0	CD209	25	223	1.06249
1	B15	DMSO	0	CD209	25	224	1.04983
1	B15	DMSO	0	CD209	25	225	1.06784
1	B15	DMSO	0	CD209	25	226	1.0562
1	B15	DMSO	0	CD209	25	227	1.06383
1	B15	DMSO	0	CD209	25	228	1.06623
1	B15	DMSO	0	CD209	25	229	1.06329
1	B15	DMSO	0	CD209	25	230	1.06134
1	B15	DMSO	0	CD209	25	231	1.05041
1	B15	DMSO	0	CD209	25	232	1.11438
1	B15	DMSO	0	CD209	25	233	1.06716
1	B15	DMSO	0	CD209	25	234	1.05922
1	B15	DMSO	0	CD209	25	235	1.07185
1	B15	DMSO	0	CD209	25	236	1.10733
1	B15	DMSO	0	CD209	25	237	1.09842
1	B15	DMSO	0	CD209	25	238	1.05527
1	B15	DMSO	0	CD209	25	239	1.05675
1	B15	DMSO	0	CD209	25	240	1.11765
1	B15	DMSO	0	CD209	25	241	1.06067
1	B15	DMSO	0	CD209	25	242	1.11232
1	B15	DMSO	0	CD209	25	243	1.05752
1	B15	DMSO	0	CD209	25	244	1.05513
1	B15	DMSO	0	CD209	25	245	1.06683
1	B15	DMSO	0	CD209	25	246	1.06774
1	B15	DMSO	0	CD209	25	247	1.07668
1	B15	DMSO	0	CD209	25	248	1.07447
1	B15	DMSO	0	CD209	25	249	1.07329
1	B15	DMSO	0	CD209	25	250	1.19317
1	B15	DMSO	0	CD209	25	251	1.0511
1	B15	DMSO	0	CD209	25	252	1.08622
1	B15	DMSO	0	CD209	25	253	1.0635
1	B15	DMSO	0	CD209	25	254	1.05568
1	B15	DMSO	0	CD209	25	255	1.05845
1	B15	DMSO	0	CD209	25	256	1.05768
1	B15	DMSO	0	CD209	25	257	1.15325
1	B15	DMSO	0	CD209	25	258	1.07428
1	B15	DMSO	0	CD209	25	259	1.08763
1	B15	DMSO	0	CD209	25	260	1.05938
1	B15	DMSO	0	CD209	25	261	1.06716
1	B15	DMSO	0	CD209	25	262	1.07205
1	B15	DMSO	0	CD209	25	263	1.05934
1	B15	DMSO	0	CD209	25	264	1.05693
1	B15	DMSO	0	CD209	25	265	1.06659
1	B15	DMSO	0	CD209	25	266	1.06873
1	B15	DMSO	0	CD209	25	267	1.06041
1	B15	DMSO	0	CD209	25	268	1.0658
1	B15	DMSO	0	CD209	25	269	1.09959
1	B15	DMSO	0	CD209	25	270	1.06313
1	B15	DMSO	0	CD209	25	271	1.05941
1	B15	DMSO	0	CD209	25	272	1.06621
1	B15	DMSO	0	CD209	25	273	1.06619
1	B15	DMSO	0	CD209	25	274	1.07194
1	B15	DMSO	0	CD209	25	275	1.05256
1	B15	DMSO	0	CD209	25	276	1.06001
1	B15	DMSO	0	CD209	25	277	1.06117
1	B15	DMSO	0	CD209	25	278	1.13064
1	B15	DMSO	0	CD209	25	279	1.09018
1	B15	DMSO	0	CD209	25	280	1.0945
1	B15	DMSO	0	CD209	25	281	1.06057
1	B15	DMSO	0	CD209	25	282	1.07643
1	B15	DMSO	0	CD209	25	283	1.07489
1	B15	DMSO	0	CD209	25	284	1.06255
1	B15	DMSO	0	CD209	25	285	1.06912
1	B15	DMSO	0	CD209	25	286	1.0711
1	B15	DMSO	0	CD209	25	287	1.05913
1	B15	DMSO	0	CD209	25	288	1.0729
1	B15	DMSO	0	CD209	25	289	1.05893
1	B15	DMSO	0	CD209	25	290	1.07045
1	B15	DMSO	0	CD209	25	291	1.06046
1	B15	DMSO	0	CD209	25	292	1.06143
1	B15	DMSO	0	CD209	25	293	1.06171
1	B15	DMSO	0	CD209	25	294	1.06242
1	B15	DMSO	0	CD209	25	295	1.06054
1	B15	DMSO	0	CD209	25	296	1.0657
1	B15	DMSO	0	CD209	25	297	1.07679
1	B15	DMSO	0	CD209	25	298	1.05941
1	B15	DMSO	0	CD209	25	299	1.07374
1	B15	DMSO	0	CD209	25	300	1.09555
1	B15	DMSO	0	CD209	25	301	1.07253
1	B15	DMSO	0	CD209	25	302	1.07039
1	B15	DMSO	0	CD209	25	303	1.06143
1	B15	DMSO	0	CD209	25	304	1.07433
1	B15	DMSO	0	CD209	25	305	1.06823
1	B15	DMSO	0	CD209	25	306	1.07353
1	B15	DMSO	0	CD209	25	307	1.0689
1	B15	DMSO	0	CD209	25	308	1.05208
1	B15	DMSO	0	CD209	25	309	1.06802
1	B15	DMSO	0	CD209	25	310	1.0677
1	B15	DMSO	0	CD209	25	311	1.06538
1	B15	DMSO	0	CD209	25	312	1.06468
1	B15	DMSO	0	CD209	25	313	1.06531
1	B15	DMSO	0	CD209	25	314	1.09947
1	B15	DMSO	0	CD209	25	315	1.06271
1	B15	DMSO	0	CD209	25	316	1.08468
1	B15	DMSO	0	CD209	25	317	1.05446
1	B15	DMSO	0	CD209	25	318	1.05005
1	B15	DMSO	0	CD209	25	319	1.066
1	B15	DMSO	0	CD209	25	320	1.05301
1	B15	DMSO	0	CD209	25	321	1.06705
1	B15	DMSO	0	CD209	25	322	1.06779
1	B15	DMSO	0	CD209	25	323	1.06682
1	B15	DMSO	0	CD209	25	324	1.05098
1	B15	DMSO	0	CD209	25	325	1.06143
1	B15	DMSO	0	CD209	25	326	1.07134
1	B15	DMSO	0	CD209	25	327	1.06543
1	B15	DMSO	0	CD209	25	328	1.0843
1	B15	DMSO	0	CD209	25	329	1.0921
1	B15	DMSO	0	CD209	25	330	1.06214
1	B15	DMSO	0	CD209	25	331	1.13202
1	B15	DMSO	0	CD209	25	332	1.05684
1	B15	DMSO	0	CD209	25	333	1.07267
1	B15	DMSO	0	CD209	25	334	1.06975
1	B15	DMSO	0	CD209	25	335	1.10371
1	B15	DMSO	0	CD209	25	336	1.09917
1	B15	DMSO	0	CD209	25	337	1.06104
1	B15	DMSO	0	CD209	25	338	1.12792
1	B15	DMSO	0	CD209	25	339	1.06434
1	B15	DMSO	0	CD209	25	340	1.06051
1	B15	DMSO	0	CD209	25	341	1.06206
1	B15	DMSO	0	CD209	25	342	1.13746
1	B15	DMSO	0	CD209	25	343	1.06047
1	B15	DMSO	0	CD209	25	344	1.06581
1	B15	DMSO	0	CD209	25	345	1.06301
1	B15	DMSO	0	CD209	25	346	1.10508
1	B15	DMSO	0	CD209	25	347	1.05112
1	B15	DMSO	0	CD209	25	348	1.06804
1	B15	DMSO	0	CD209	25	349	1.05702
1	B15	DMSO	0	CD209	25	350	1.05739
1	B15	DMSO	0	CD209	25	351	1.08609
1	B15	DMSO	0	CD209	25	352	1.07231
1	B15	DMSO	0	CD209	25	353	1.06624
1	B15	DMSO	0	CD209	25	354	1.06261
1	B15	DMSO	0	CD209	25	355	1.05772
1	B15	DMSO	0	CD209	25	356	1.06426
1	B15	DMSO	0	CD209	25	357	1.062
1	B15	DMSO	0	CD209	25	358	1.0667
1	B15	DMSO	0	CD209	25	359	1.06845
1	B15	DMSO	0	CD209	25	360	1.09495
1	B15	DMSO	0	CD209	25	361	1.08915
1	B15	DMSO	0	CD209	25	362	1.06934
1	B15	DMSO	0	CD209	25	363	1.06442
1	B15	DMSO	0	CD209	25	364	1.08244
1	B15	DMSO	0	CD209	25	365	1.05977
1	B15	DMSO	0	CD209	25	366	1.05678
1	B15	DMSO	0	CD209	25	367	1.22022
1	B15	DMSO	0	CD209	25	368	1.06166
1	B15	DMSO	0	CD209	25	369	1.06795
1	B15	DMSO	0	CD209	25	370	1.05473
1	B15	DMSO	0	CD209	25	371	1.05525
1	B15	DMSO	0	CD209	25	372	1.07
1	B15	DMSO	0	CD209	25	373	1.06309
1	B15	DMSO	0	CD209	25	374	1.06832
1	B15	DMSO	0	CD209	25	375	1.0587
1	B15	DMSO	0	CD209	25	376	1.06895
1	B15	DMSO	0	CD209	25	377	1.33269
1	B15	DMSO	0	CD209	25	378	1.0709
1	B15	DMSO	0	CD209	25	379	1.06344
1	B15	DMSO	0	CD209	25	380	1.07484
1	B15	DMSO	0	CD209	25	381	1.07519
1	B15	DMSO	0	CD209	25	382	1.1795
1	B15	DMSO	0	CD209	25	383	1.06727
1	B15	DMSO	0	CD209	25	384	1.06146
1	B15	DMSO	0	CD209	25	385	1.05332
1	B15	DMSO	0	CD209	25	386	1.07499
1	B15	DMSO	0	CD209	25	387	1.06151
1	B15	DMSO	0	CD209	25	388	1.12464
1	B15	DMSO	0	CD209	25	389	1.0592
1	B15	DMSO	0	CD209	25	390	1.14768
1	B15	DMSO	0	CD209	25	391	1.07548
1	B15	DMSO	0	CD209	25	392	1.05988
1	B15	DMSO	0	CD209	25	393	1.0667
1	B15	DMSO	0	CD209	25	394	1.05936
1	B15	DMSO	0	CD209	25	395	1.07274
1	B15	DMSO	0	CD209	25	396	1.06233
1	B15	DMSO	0	CD209	25	397	1.07262
1	B15	DMSO	0	CD209	25	398	1.0561
1	B15	DMSO	0	CD209	25	399	1.06186
1	B15	DMSO	0	CD209	25	400	1.05829
1	B15	DMSO	0	CD209	25	401	1.07711
1	B15	DMSO	0	CD209	25	402	1.06795
1	B15	DMSO	0	CD209	25	403	1.054
1	B15	DMSO	0	CD209	25	404	1.05223
1	B15	DMSO	0	CD209	25	405	1.06276
1	B15	DMSO	0	CD209	25	406	1.06575
1	B15	DMSO	0	CD209	25	407	1.12919
1	B15	DMSO	0	CD209	25	408	1.1034
1	B15	DMSO	0	CD209	25	409	1.0614
1	B15	DMSO	0	CD209	25	410	1.06275
1	B15	DMSO	0	CD209	25	411	1.06401
1	B15	DMSO	0	CD209	25	412	1.07081
1	B15	DMSO	0	CD209	25	413	1.05985
1	B15	DMSO	0	CD209	25	414	1.06782
1	B15	DMSO	0	CD209	25	415	1.06379
1	B15	DMSO	0	CD209	25	416	1.05685
1	B15	DMSO	0	CD209	25	417	1.06328
1	B15	DMSO	0	CD209	25	418	1.05973
1	B15	DMSO	0	CD209	25	419	1.05684
1	B15	DMSO	0	CD209	25	420	1.06394
1	B15	DMSO	0	CD209	25	421	1.06474
1	B15	DMSO	0	CD209	25	422	1.05848
1	B15	DMSO	0	CD209	25	423	1.0652
1	B15	DMSO	0	CD209	25	424	1.06384
1	B15	DMSO	0	CD209	25	425	1.0627
1	B15	DMSO	0	CD209	25	426	1.06354
1	B15	DMSO	0	CD209	25	427	1.07608
1	B15	DMSO	0	CD209	25	428	1.0592
1	B15	DMSO	0	CD209	25	429	1.06096
1	B15	DMSO	0	CD209	25	430	1.06457
1	B15	DMSO	0	CD209	25	431	1.58316
1	B15	DMSO	0	CD209	25	432	1.06143
1	B15	DMSO	0	CD209	25	433	1.06746
1	B15	DMSO	0	CD209	25	434	1.0592
1	B15	DMSO	0	CD209	25	435	1.05948
1	B15	DMSO	0	CD209	25	436	1.06615
1	B15	DMSO	0	CD209	25	437	1.07705
1	B15	DMSO	0	CD209	25	438	1.06452
1	B15	DMSO	0	CD209	25	439	1.07393
1	B15	DMSO	0	CD209	25	440	1.06835
1	B15	DMSO	0	CD209	25	441	1.05645
1	B15	DMSO	0	CD209	25	442	1.07839
1	B15	DMSO	0	CD209	25	443	1.12776
1	B15	DMSO	0	CD209	25	444	1.06232
1	B15	DMSO	0	CD209	25	445	1.07195
1	B15	DMSO	0	CD209	25	446	1.05892
1	B15	DMSO	0	CD209	25	447	1.13725
1	B15	DMSO	0	CD209	25	448	1.05789
1	B15	DMSO	0	CD209	25	449	1.05548
1	B15	DMSO	0	CD209	25	450	1.06061
1	B15	DMSO	0	CD209	25	451	1.06614
1	B15	DMSO	0	CD209	25	452	1.06044
1	B15	DMSO	0	CD209	25	453	1.29649
1	B15	DMSO	0	CD209	25	454	1.06833
1	B15	DMSO	0	CD209	25	455	1.1853
1	B15	DMSO	0	CD209	25	456	1.04796
1	B15	DMSO	0	CD209	25	457	1.05892
1	B15	DMSO	0	CD209	25	458	1.06903
1	B15	DMSO	0	CD209	25	459	1.06675
1	B15	DMSO	0	CD209	25	460	1.05447
1	B15	DMSO	0	CD209	25	461	1.06068
1	B15	DMSO	0	CD209	25	462	1.16293
1	B15	DMSO	0	CD209	25	463	1.0589
1	B15	DMSO	0	CD209	25	464	1.06284
1	B15	DMSO	0	CD209	25	465	1.07908
1	B15	DMSO	0	CD209	25	466	1.07807
1	B15	DMSO	0	CD209	25	467	1.07501
1	B15	DMSO	0	CD209	25	468	1.07235
1	B15	DMSO	0	CD209	25	469	1.06044
1	B15	DMSO	0	CD209	25	470	1.06288
1	B15	DMSO	0	CD209	25	471	1.07775
1	B15	DMSO	0	CD209	25	472	1.05954
1	B15	DMSO	0	CD209	25	473	1.06325
1	B15	DMSO	0	CD209	25	474	1.05563
1	B15	DMSO	0	CD209	25	475	1.06678
1	B15	DMSO	0	CD209	25	476	1.0676
1	B15	DMSO	0	CD209	25	477	1.0587
1	B15	DMSO	0	CD209	25	478	1.05512
1	B15	DMSO	0	CD209	25	479	1.06226
1	B15	DMSO	0	CD209	25	480	1.05943
1	B15	DMSO	0	CD209	25	481	1.05604
1	B15	DMSO	0	CD209	25	482	1.05741
1	B15	DMSO	0	CD209	25	483	1.0578
1	B15	DMSO	0	CD209	25	484	1.10632
1	B15	DMSO	0	CD209	25	485	1.07439
1	B15	DMSO	0	CD209	25	486	1.06848
1	B15	DMSO	0	CD209	25	487	1.0749
1	B15	DMSO	0	CD209	25	488	1.05787
1	B15	DMSO	0	CD209	25	489	1.0695
1	B15	DMSO	0	CD209	25	490	1.05971
1	B15	DMSO	0	CD209	25	491	1.05358
1	B15	DMSO	0	CD209	25	492	1.0653
1	B15	DMSO	0	CD209	25	493	1.06481
1	B15	DMSO	0	CD209	25	494	1.06083
1	B15	DMSO	0	CD209	25	495	1.06568
1	B15	DMSO	0	CD209	25	496	1.09348
1	B15	DMSO	0	CD209	25	497	1.06305
1	B15	DMSO	0	CD209	25	498	1.06141
1	B15	DMSO	0	CD209	25	499	1.06121
1	B15	DMSO	0	CD209	25	500	1.09584
1	B15	DMSO	0	CD209	25	501	1.07068
1	B15	DMSO	0	CD209	25	502	1.06151
1	B15	DMSO	0	CD209	25	503	1.05333
1	B15	DMSO	0	CD209	25	504	1.09024
1	B15	DMSO	0	CD209	25	505	1.05957
1	B15	DMSO	0	CD209	25	506	1.07115
1	B15	DMSO	0	CD209	25	507	1.05669
1	B15	DMSO	0	CD209	25	508	1.08084
1	B15	DMSO	0	CD209	25	509	1.07083
1	B15	DMSO	0	CD209	25	510	1.06865
1	B15	DMSO	0	CD209	25	511	1.06137
1	B15	DMSO	0	CD209	25	512	1.0568
1	B15	DMSO	0	CD209	25	513	1.06421
1	B15	DMSO	0	CD209	25	514	1.06336
1	B15	DMSO	0	CD209	25	515	1.05921
1	B15	DMSO	0	CD209	25	516	1.06101
1	B15	DMSO	0	CD209	25	517	1.05782
1	B15	DMSO	0	CD209	25	518	1.30441
1	B15	DMSO	0	CD209	25	519	1.05077
1	B15	DMSO	0	CD209	25	520	1.06691
1	B15	DMSO	0	CD209	25	521	1.06098
1	B15	DMSO	0	CD209	25	522	1.05774
1	B15	DMSO	0	CD209	25	523	1.05005
1	B15	DMSO	0	CD209	25	524	1.06816
1	B15	DMSO	0	CD209	25	525	1.07053
1	B15	DMSO	0	CD209	25	526	1.06551
1	B15	DMSO	0	CD209	25	527	1.10549
1	B15	DMSO	0	CD209	25	528	1.06264
1	B15	DMSO	0	CD209	25	529	1.05579
1	B15	DMSO	0	CD209	25	530	1.06288
1	B15	DMSO	0	CD209	25	531	1.06116
1	B15	DMSO	0	CD209	25	532	1.07247
1	B15	DMSO	0	CD209	25	533	1.07929
1	B15	DMSO	0	CD209	25	534	1.05797
1	B15	DMSO	0	CD209	25	535	1.06502
1	B15	DMSO	0	CD209	25	536	1.19287
1	B15	DMSO	0	CD209	25	537	1.06606
2	B15	DMSO	0	CD209	26	2	1.05372
2	B15	DMSO	0	CD209	26	3	1.07252
2	B15	DMSO	0	CD209	26	4	1.06247
2	B15	DMSO	0	CD209	26	5	1.06713
2	B15	DMSO	0	CD209	26	6	1.07372
2	B15	DMSO	0	CD209	26	7	1.05671
2	B15	DMSO	0	CD209	26	8	1.05716
2	B15	DMSO	0	CD209	26	9	1.06224
2	B15	DMSO	0	CD209	26	10	1.06377
2	B15	DMSO	0	CD209	26	11	1.06543
2	B15	DMSO	0	CD209	26	12	1.06646
2	B15	DMSO	0	CD209	26	13	1.06711
2	B15	DMSO	0	CD209	26	14	1.08223
2	B15	DMSO	0	CD209	26	15	1.06869
2	B15	DMSO	0	CD209	26	16	1.06609
2	B15	DMSO	0	CD209	26	17	1.0579
2	B15	DMSO	0	CD209	26	18	1.06103
2	B15	DMSO	0	CD209	26	19	1.05671
2	B15	DMSO	0	CD209	26	20	1.05301
2	B15	DMSO	0	CD209	26	21	1.05933
2	B15	DMSO	0	CD209	26	22	1.08453
2	B15	DMSO	0	CD209	26	23	1.06578
2	B15	DMSO	0	CD209	26	24	1.05481
2	B15	DMSO	0	CD209	26	25	1.07111
2	B15	DMSO	0	CD209	26	26	1.06545
2	B15	DMSO	0	CD209	26	27	1.08115
2	B15	DMSO	0	CD209	26	28	1.06416
2	B15	DMSO	0	CD209	26	29	1.06671
2	B15	DMSO	0	CD209	26	30	1.06568
2	B15	DMSO	0	CD209	26	31	1.06912
2	B15	DMSO	0	CD209	26	32	1.06122
2	B15	DMSO	0	CD209	26	33	1.06256
2	B15	DMSO	0	CD209	26	34	1.05892
2	B15	DMSO	0	CD209	26	35	1.05272
2	B15	DMSO	0	CD209	26	36	1.07606
2	B15	DMSO	0	CD209	26	37	1.06089
2	B15	DMSO	0	CD209	26	38	1.06504
2	B15	DMSO	0	CD209	26	39	1.0581
2	B15	DMSO	0	CD209	26	40	1.06431
2	B15	DMSO	0	CD209	26	41	1.05669
2	B15	DMSO	0	CD209	26	42	1.05021
2	B15	DMSO	0	CD209	26	43	1.06962
2	B15	DMSO	0	CD209	26	44	1.07126
2	B15	DMSO	0	CD209	26	45	1.05385
2	B15	DMSO	0	CD209	26	46	1.05593
2	B15	DMSO	0	CD209	26	47	1.05094
2	B15	DMSO	0	CD209	26	48	1.07981
2	B15	DMSO	0	CD209	26	49	1.07116
2	B15	DMSO	0	CD209	26	50	1.05884
2	B15	DMSO	0	CD209	26	51	1.08976
2	B15	DMSO	0	CD209	26	52	1.05627
2	B15	DMSO	0	CD209	26	53	1.05647
2	B15	DMSO	0	CD209	26	54	1.05569
2	B15	DMSO	0	CD209	26	55	1.06284
2	B15	DMSO	0	CD209	26	56	1.06173
2	B15	DMSO	0	CD209	26	57	1.05739
2	B15	DMSO	0	CD209	26	58	1.06646
2	B15	DMSO	0	CD209	26	59	1.07022
2	B15	DMSO	0	CD209	26	60	1.0662
2	B15	DMSO	0	CD209	26	61	1.06552
2	B15	DMSO	0	CD209	26	62	1.05969
2	B15	DMSO	0	CD209	26	63	1.05597
2	B15	DMSO	0	CD209	26	64	1.05673
2	B15	DMSO	0	CD209	26	65	1.07558
2	B15	DMSO	0	CD209	26	66	1.05939
2	B15	DMSO	0	CD209	26	67	1.05864
2	B15	DMSO	0	CD209	26	68	1.05969
2	B15	DMSO	0	CD209	26	69	1.06934
2	B15	DMSO	0	CD209	26	70	1.06407
2	B15	DMSO	0	CD209	26	71	1.07424
2	B15	DMSO	0	CD209	26	72	1.05782
2	B15	DMSO	0	CD209	26	73	1.0768
2	B15	DMSO	0	CD209	26	74	1.06168
2	B15	DMSO	0	CD209	26	75	1.05634
2	B15	DMSO	0	CD209	26	76	1.05464
2	B15	DMSO	0	CD209	26	77	1.06198
2	B15	DMSO	0	CD209	26	78	1.06654
2	B15	DMSO	0	CD209	26	79	1.06779
2	B15	DMSO	0	CD209	26	80	1.05915
2	B15	DMSO	0	CD209	26	81	1.06339
2	B15	DMSO	0	CD209	26	82	1.05918
2	B15	DMSO	0	CD209	26	83	1.1489
2	B15	DMSO	0	CD209	26	84	1.05428
2	B15	DMSO	0	CD209	26	85	1.05736
2	B15	DMSO	0	CD209	26	86	1.06415
2	B15	DMSO	0	CD209	26	87	1.06461
2	B15	DMSO	0	CD209	26	88	1.06222
2	B15	DMSO	0	CD209	26	89	1.05786
2	B15	DMSO	0	CD209	26	90	1.07286
2	B15	DMSO	0	CD209	26	91	1.07667
2	B15	DMSO	0	CD209	26	92	1.05699
2	B15	DMSO	0	CD209	26	93	1.05735
2	B15	DMSO	0	CD209	26	94	1.06431
2	B15	DMSO	0	CD209	26	95	1.07747
2	B15	DMSO	0	CD209	26	96	1.09904
2	B15	DMSO	0	CD209	26	97	1.06963
2	B15	DMSO	0	CD209	26	98	1.06834
2	B15	DMSO	0	CD209	26	99	1.0629
2	B15	DMSO	0	CD209	26	100	1.06701
2	B15	DMSO	0	CD209	26	101	1.1456
2	B15	DMSO	0	CD209	26	102	1.06838
2	B15	DMSO	0	CD209	26	103	1.06906
2	B15	DMSO	0	CD209	26	104	1.06498
2	B15	DMSO	0	CD209	26	105	1.06124
2	B15	DMSO	0	CD209	26	106	1.07116
2	B15	DMSO	0	CD209	26	107	1.06065
2	B15	DMSO	0	CD209	26	108	1.06145
2	B15	DMSO	0	CD209	26	109	1.05913
2	B15	DMSO	0	CD209	26	110	1.06439
2	B15	DMSO	0	CD209	26	111	1.0538
2	B15	DMSO	0	CD209	26	112	1.06789
2	B15	DMSO	0	CD209	26	113	1.13019
2	B15	DMSO	0	CD209	26	114	1.06052
2	B15	DMSO	0	CD209	26	115	1.06784
2	B15	DMSO	0	CD209	26	116	1.0564
2	B15	DMSO	0	CD209	26	117	1.06516
2	B15	DMSO	0	CD209	26	118	1.07009
2	B15	DMSO	0	CD209	26	119	1.05662
2	B15	DMSO	0	CD209	26	120	1.05896
2	B15	DMSO	0	CD209	26	121	1.08509
2	B15	DMSO	0	CD209	26	122	1.07248
2	B15	DMSO	0	CD209	26	123	1.06285
2	B15	DMSO	0	CD209	26	124	1.05422
2	B15	DMSO	0	CD209	26	125	1.05331
2	B15	DMSO	0	CD209	26	126	1.08329
2	B15	DMSO	0	CD209	26	127	1.05645
2	B15	DMSO	0	CD209	26	128	1.06567
2	B15	DMSO	0	CD209	26	129	1.06218
2	B15	DMSO	0	CD209	26	130	1.05841
2	B15	DMSO	0	CD209	26	131	1.06063
2	B15	DMSO	0	CD209	26	132	1.07185
2	B15	DMSO	0	CD209	26	133	1.06164
2	B15	DMSO	0	CD209	26	134	1.06002
2	B15	DMSO	0	CD209	26	135	1.06174
2	B15	DMSO	0	CD209	26	136	1.05622
2	B15	DMSO	0	CD209	26	137	1.05721
2	B15	DMSO	0	CD209	26	138	1.05137
2	B15	DMSO	0	CD209	26	139	1.12354
2	B15	DMSO	0	CD209	26	140	1.06014
2	B15	DMSO	0	CD209	26	141	1.06332
2	B15	DMSO	0	CD209	26	142	1.10863
2	B15	DMSO	0	CD209	26	143	1.05902
2	B15	DMSO	0	CD209	26	144	1.06556
2	B15	DMSO	0	CD209	26	145	1.05851
2	B15	DMSO	0	CD209	26	146	1.06199
2	B15	DMSO	0	CD209	26	147	1.06019
2	B15	DMSO	0	CD209	26	148	1.0657
2	B15	DMSO	0	CD209	26	149	1.05735
2	B15	DMSO	0	CD209	26	150	1.0579
2	B15	DMSO	0	CD209	26	151	1.06574
2	B15	DMSO	0	CD209	26	152	1.05835
2	B15	DMSO	0	CD209	26	153	1.05802
2	B15	DMSO	0	CD209	26	154	1.05957
2	B15	DMSO	0	CD209	26	155	1.06213
2	B15	DMSO	0	CD209	26	156	1.07831
2	B15	DMSO	0	CD209	26	157	1.06454
2	B15	DMSO	0	CD209	26	158	1.06904
2	B15	DMSO	0	CD209	26	159	1.10401
2	B15	DMSO	0	CD209	26	160	1.05744
2	B15	DMSO	0	CD209	26	161	1.06254
2	B15	DMSO	0	CD209	26	162	1.06299
2	B15	DMSO	0	CD209	26	163	1.07421
2	B15	DMSO	0	CD209	26	164	1.05884
2	B15	DMSO	0	CD209	26	165	1.07682
2	B15	DMSO	0	CD209	26	166	1.07302
2	B15	DMSO	0	CD209	26	167	1.05874
2	B15	DMSO	0	CD209	26	168	1.06482
2	B15	DMSO	0	CD209	26	170	1.06394
2	B15	DMSO	0	CD209	26	171	1.06357
2	B15	DMSO	0	CD209	26	172	1.06643
2	B15	DMSO	0	CD209	26	173	1.05171
2	B15	DMSO	0	CD209	26	174	1.06738
2	B15	DMSO	0	CD209	26	175	1.05891
2	B15	DMSO	0	CD209	26	176	1.06041
2	B15	DMSO	0	CD209	26	177	1.06554
2	B15	DMSO	0	CD209	26	178	1.0605
2	B15	DMSO	0	CD209	26	179	1.05839
2	B15	DMSO	0	CD209	26	180	1.06166
2	B15	DMSO	0	CD209	26	181	1.06544
2	B15	DMSO	0	CD209	26	182	1.12718
2	B15	DMSO	0	CD209	26	183	1.06193
2	B15	DMSO	0	CD209	26	184	1.0662
2	B15	DMSO	0	CD209	26	185	1.05799
2	B15	DMSO	0	CD209	26	186	1.05556
2	B15	DMSO	0	CD209	26	187	1.05832
2	B15	DMSO	0	CD209	26	188	1.05603
2	B15	DMSO	0	CD209	26	189	1.06171
2	B15	DMSO	0	CD209	26	190	1.11869
2	B15	DMSO	0	CD209	26	191	1.08291
2	B15	DMSO	0	CD209	26	192	1.06384
2	B15	DMSO	0	CD209	26	193	1.05598
2	B15	DMSO	0	CD209	26	194	1.06546
2	B15	DMSO	0	CD209	26	195	1.14048
2	B15	DMSO	0	CD209	26	196	1.05752
2	B15	DMSO	0	CD209	26	197	1.06982
2	B15	DMSO	0	CD209	26	198	1.05519
2	B15	DMSO	0	CD209	26	199	1.06068
2	B15	DMSO	0	CD209	26	200	1.06531
2	B15	DMSO	0	CD209	26	201	1.06425
2	B15	DMSO	0	CD209	26	202	1.06136
2	B15	DMSO	0	CD209	26	203	1.05843
2	B15	DMSO	0	CD209	26	204	1.05766
2	B15	DMSO	0	CD209	26	205	1.05931
2	B15	DMSO	0	CD209	26	206	1.12048
2	B15	DMSO	0	CD209	26	207	1.06196
2	B15	DMSO	0	CD209	26	208	1.05459
2	B15	DMSO	0	CD209	26	209	1.05567
2	B15	DMSO	0	CD209	26	210	1.06207
2	B15	DMSO	0	CD209	26	211	1.05238
2	B15	DMSO	0	CD209	26	212	1.06214
2	B15	DMSO	0	CD209	26	213	1.09195
2	B15	DMSO	0	CD209	26	214	1.07472
2	B15	DMSO	0	CD209	26	215	1.06382
2	B15	DMSO	0	CD209	26	216	1.06094
2	B15	DMSO	0	CD209	26	217	1.05427
2	B15	DMSO	0	CD209	26	219	1.05728
2	B15	DMSO	0	CD209	26	220	1.06163
2	B15	DMSO	0	CD209	26	221	1.06822
2	B15	DMSO	0	CD209	26	222	1.0972
2	B15	DMSO	0	CD209	26	223	1.05969
2	B15	DMSO	0	CD209	26	224	1.07668
2	B15	DMSO	0	CD209	26	225	1.08084
2	B15	DMSO	0	CD209	26	226	1.09702
2	B15	DMSO	0	CD209	26	227	1.16013
2	B15	DMSO	0	CD209	26	228	1.07791
2	B15	DMSO	0	CD209	26	229	1.08417
2	B15	DMSO	0	CD209	26	230	1.07096
2	B15	DMSO	0	CD209	26	231	1.06609
2	B15	DMSO	0	CD209	26	232	1.06165
2	B15	DMSO	0	CD209	26	233	1.06221
2	B15	DMSO	0	CD209	26	234	1.06306
2	B15	DMSO	0	CD209	26	235	1.07319
2	B15	DMSO	0	CD209	26	236	1.09208
2	B15	DMSO	0	CD209	26	237	1.11895
2	B15	DMSO	0	CD209	26	238	1.06593
2	B15	DMSO	0	CD209	26	239	1.06445
2	B15	DMSO	0	CD209	26	240	1.06616
2	B15	DMSO	0	CD209	26	241	1.06334
2	B15	DMSO	0	CD209	26	242	1.06432
2	B15	DMSO	0	CD209	26	243	1.06578
2	B15	DMSO	0	CD209	26	244	1.06529
2	B15	DMSO	0	CD209	26	245	1.09956
2	B15	DMSO	0	CD209	26	246	1.06066
2	B15	DMSO	0	CD209	26	247	1.06349
2	B15	DMSO	0	CD209	26	248	1.05561
2	B15	DMSO	0	CD209	26	249	1.04819
2	B15	DMSO	0	CD209	26	250	1.05941
2	B15	DMSO	0	CD209	26	251	1.06624
2	B15	DMSO	0	CD209	26	252	1.06442
2	B15	DMSO	0	CD209	26	253	1.06977
2	B15	DMSO	0	CD209	26	254	1.1917
2	B15	DMSO	0	CD209	26	255	1.10708
2	B15	DMSO	0	CD209	26	256	1.06269
2	B15	DMSO	0	CD209	26	257	1.19967
2	B15	DMSO	0	CD209	26	258	1.05679
2	B15	DMSO	0	CD209	26	259	1.0679
2	B15	DMSO	0	CD209	26	260	1.1504
2	B15	DMSO	0	CD209	26	261	1.05785
2	B15	DMSO	0	CD209	26	262	1.07548
2	B15	DMSO	0	CD209	26	263	1.07117
2	B15	DMSO	0	CD209	26	264	1.06972
2	B15	DMSO	0	CD209	26	265	1.07218
2	B15	DMSO	0	CD209	26	266	1.07066
2	B15	DMSO	0	CD209	26	267	1.05504
2	B15	DMSO	0	CD209	26	268	1.09834
2	B15	DMSO	0	CD209	26	269	1.08501
2	B15	DMSO	0	CD209	26	270	1.12096
2	B15	DMSO	0	CD209	26	271	1.09515
2	B15	DMSO	0	CD209	26	272	1.07718
2	B15	DMSO	0	CD209	26	273	1.13067
2	B15	DMSO	0	CD209	26	274	1.06384
2	B15	DMSO	0	CD209	26	275	1.05681
2	B15	DMSO	0	CD209	26	276	1.0901
2	B15	DMSO	0	CD209	26	277	1.06578
2	B15	DMSO	0	CD209	26	278	1.11327
2	B15	DMSO	0	CD209	26	279	1.06061
2	B15	DMSO	0	CD209	26	280	1.06321
2	B15	DMSO	0	CD209	26	281	1.06386
2	B15	DMSO	0	CD209	26	282	1.06373
2	B15	DMSO	0	CD209	26	283	1.06012
2	B15	DMSO	0	CD209	26	284	1.05846
2	B15	DMSO	0	CD209	26	285	1.11217
2	B15	DMSO	0	CD209	26	286	1.06297
2	B15	DMSO	0	CD209	26	287	1.07474
2	B15	DMSO	0	CD209	26	288	1.06523
2	B15	DMSO	0	CD209	26	289	1.07687
2	B15	DMSO	0	CD209	26	290	1.0679
2	B15	DMSO	0	CD209	26	291	1.05758
2	B15	DMSO	0	CD209	26	292	1.06712
2	B15	DMSO	0	CD209	26	293	1.06813
2	B15	DMSO	0	CD209	26	294	1.09925
2	B15	DMSO	0	CD209	26	295	1.0592
2	B15	DMSO	0	CD209	26	296	1.06811
2	B15	DMSO	0	CD209	26	297	1.07044
2	B15	DMSO	0	CD209	26	298	1.0582
2	B15	DMSO	0	CD209	26	299	1.0689
2	B15	DMSO	0	CD209	26	300	1.07114
2	B15	DMSO	0	CD209	26	301	1.06027
2	B15	DMSO	0	CD209	26	302	1.06131
2	B15	DMSO	0	CD209	26	303	1.07875
2	B15	DMSO	0	CD209	26	304	1.06144
2	B15	DMSO	0	CD209	26	305	1.07334
2	B15	DMSO	0	CD209	26	306	1.06093
2	B15	DMSO	0	CD209	26	307	1.06625
2	B15	DMSO	0	CD209	26	308	1.08664
2	B15	DMSO	0	CD209	26	309	1.06536
2	B15	DMSO	0	CD209	26	310	1.06232
2	B15	DMSO	0	CD209	26	311	1.06598
2	B15	DMSO	0	CD209	26	312	1.0637
2	B15	DMSO	0	CD209	26	313	1.06328
2	B15	DMSO	0	CD209	26	314	1.2139
2	B15	DMSO	0	CD209	26	315	1.06356
2	B15	DMSO	0	CD209	26	316	1.07007
2	B15	DMSO	0	CD209	26	317	1.06256
2	B15	DMSO	0	CD209	26	318	1.0606
2	B15	DMSO	0	CD209	26	319	1.06733
2	B15	DMSO	0	CD209	26	320	1.06286
2	B15	DMSO	0	CD209	26	321	1.06536
2	B15	DMSO	0	CD209	26	322	1.06085
2	B15	DMSO	0	CD209	26	323	1.07286
2	B15	DMSO	0	CD209	26	324	1.06091
2	B15	DMSO	0	CD209	26	325	1.06454
2	B15	DMSO	0	CD209	26	326	1.05844
2	B15	DMSO	0	CD209	26	327	1.05758
2	B15	DMSO	0	CD209	26	328	1.07275
2	B15	DMSO	0	CD209	26	329	1.05761
2	B15	DMSO	0	CD209	26	330	1.061
2	B15	DMSO	0	CD209	26	331	1.06866
2	B15	DMSO	0	CD209	26	332	1.08691
2	B15	DMSO	0	CD209	26	333	1.06272
2	B15	DMSO	0	CD209	26	334	1.12489
2	B15	DMSO	0	CD209	26	335	1.06486
2	B15	DMSO	0	CD209	26	336	1.0682
2	B15	DMSO	0	CD209	26	337	1.06088
2	B15	DMSO	0	CD209	26	338	1.06216
2	B15	DMSO	0	CD209	26	339	1.0724
2	B15	DMSO	0	CD209	26	340	1.07245
2	B15	DMSO	0	CD209	26	341	1.0673
2	B15	DMSO	0	CD209	26	342	1.06432
2	B15	DMSO	0	CD209	26	343	1.05973
2	B15	DMSO	0	CD209	26	344	1.06003
2	B15	DMSO	0	CD209	26	345	1.05799
2	B15	DMSO	0	CD209	26	346	1.0668
2	B15	DMSO	0	CD209	26	347	1.05453
2	B15	DMSO	0	CD209	26	348	1.06759
2	B15	DMSO	0	CD209	26	349	1.06142
2	B15	DMSO	0	CD209	26	350	1.06869
2	B15	DMSO	0	CD209	26	351	1.05715
2	B15	DMSO	0	CD209	26	352	1.07306
2	B15	DMSO	0	CD209	26	353	1.06662
2	B15	DMSO	0	CD209	26	354	1.05932
2	B15	DMSO	0	CD209	26	355	1.05167
2	B15	DMSO	0	CD209	26	356	1.06824
2	B15	DMSO	0	CD209	26	357	1.0586
2	B15	DMSO	0	CD209	26	358	1.09472
2	B15	DMSO	0	CD209	26	359	1.06238
2	B15	DMSO	0	CD209	26	360	1.06039
2	B15	DMSO	0	CD209	26	361	1.07177
2	B15	DMSO	0	CD209	26	362	1.06167
2	B15	DMSO	0	CD209	26	363	1.06138
2	B15	DMSO	0	CD209	26	364	1.05897
2	B15	DMSO	0	CD209	26	365	1.07106
2	B15	DMSO	0	CD209	26	366	1.0895
2	B15	DMSO	0	CD209	26	367	1.14444
2	B15	DMSO	0	CD209	26	368	1.06254
2	B15	DMSO	0	CD209	26	369	1.06495
2	B15	DMSO	0	CD209	26	370	1.06431
2	B15	DMSO	0	CD209	26	371	1.06646
2	B15	DMSO	0	CD209	26	372	1.06113
2	B15	DMSO	0	CD209	26	373	1.07212
2	B15	DMSO	0	CD209	26	374	1.10446
2	B15	DMSO	0	CD209	26	375	1.05982
2	B15	DMSO	0	CD209	26	376	1.0642
2	B15	DMSO	0	CD209	26	377	1.0575
2	B15	DMSO	0	CD209	26	378	1.0518
2	B15	DMSO	0	CD209	26	379	1.07143
2	B15	DMSO	0	CD209	26	380	1.06616
2	B15	DMSO	0	CD209	26	381	1.06471
2	B15	DMSO	0	CD209	26	382	1.06074
2	B15	DMSO	0	CD209	26	383	1.07096
2	B15	DMSO	0	CD209	26	384	1.06246
2	B15	DMSO	0	CD209	26	385	1.06429
2	B15	DMSO	0	CD209	26	386	1.06023
2	B15	DMSO	0	CD209	26	387	1.0615
2	B15	DMSO	0	CD209	26	388	1.18298
2	B15	DMSO	0	CD209	26	389	1.09945
2	B15	DMSO	0	CD209	26	390	1.06105
2	B15	DMSO	0	CD209	26	391	1.0696
2	B15	DMSO	0	CD209	26	392	1.06562
2	B15	DMSO	0	CD209	26	393	1.06291
2	B15	DMSO	0	CD209	26	394	1.06686
2	B15	DMSO	0	CD209	26	395	1.05775
2	B15	DMSO	0	CD209	26	396	1.07997
2	B15	DMSO	0	CD209	26	397	1.06243
2	B15	DMSO	0	CD209	26	398	1.06478
2	B15	DMSO	0	CD209	26	399	1.06441
2	B15	DMSO	0	CD209	26	400	1.05709
2	B15	DMSO	0	CD209	26	401	1.06184
2	B15	DMSO	0	CD209	26	402	1.09364
2	B15	DMSO	0	CD209	26	403	1.06403
2	B15	DMSO	0	CD209	26	404	1.05764
2	B15	DMSO	0	CD209	26	405	1.06743
2	B15	DMSO	0	CD209	26	406	1.06282
2	B15	DMSO	0	CD209	26	407	1.06774
2	B15	DMSO	0	CD209	26	408	1.06295
2	B15	DMSO	0	CD209	26	409	1.05576
2	B15	DMSO	0	CD209	26	410	1.06243
2	B15	DMSO	0	CD209	26	411	1.05694
2	B15	DMSO	0	CD209	26	412	1.06054
2	B15	DMSO	0	CD209	26	413	1.05293
2	B15	DMSO	0	CD209	26	414	1.06304
2	B15	DMSO	0	CD209	26	415	1.05534
2	B15	DMSO	0	CD209	26	416	1.056
2	B15	DMSO	0	CD209	26	417	1.06217
2	B15	DMSO	0	CD209	26	418	1.35248
2	B15	DMSO	0	CD209	26	419	1.06069
2	B15	DMSO	0	CD209	26	420	1.05998
2	B15	DMSO	0	CD209	26	421	1.30947
2	B15	DMSO	0	CD209	26	422	1.06516
2	B15	DMSO	0	CD209	26	423	1.05746
2	B15	DMSO	0	CD209	26	424	1.07811
2	B15	DMSO	0	CD209	26	425	1.05122
2	B15	DMSO	0	CD209	26	426	1.06105
2	B15	DMSO	0	CD209	26	427	1.07043
2	B15	DMSO	0	CD209	26	428	1.17415
2	B15	DMSO	0	CD209	26	429	1.06261
2	B15	DMSO	0	CD209	26	430	1.06508
2	B15	DMSO	0	CD209	26	431	1.06281
2	B15	DMSO	0	CD209	26	432	1.07453
2	B15	DMSO	0	CD209	26	433	1.06307
2	B15	DMSO	0	CD209	26	434	1.06469
2	B15	DMSO	0	CD209	26	435	1.06145
2	B15	DMSO	0	CD209	26	436	1.05805
2	B15	DMSO	0	CD209	26	437	1.05804
2	B15	DMSO	0	CD209	26	438	1.05957
2	B15	DMSO	0	CD209	26	439	1.07209
2	B15	DMSO	0	CD209	26	440	1.06241
2	B15	DMSO	0	CD209	26	441	1.06752
2	B15	DMSO	0	CD209	26	442	1.05486
2	B15	DMSO	0	CD209	26	443	1.07452
2	B15	DMSO	0	CD209	26	444	1.06551
2	B15	DMSO	0	CD209	26	445	1.0918
2	B15	DMSO	0	CD209	26	446	1.05302
2	B15	DMSO	0	CD209	26	447	1.07612
2	B15	DMSO	0	CD209	26	448	1.05808
2	B15	DMSO	0	CD209	26	449	1.07171
2	B15	DMSO	0	CD209	26	450	1.05549
2	B15	DMSO	0	CD209	26	451	1.0606
2	B15	DMSO	0	CD209	26	452	1.06067
2	B15	DMSO	0	CD209	26	453	1.06855
2	B15	DMSO	0	CD209	26	454	1.06589
2	B15	DMSO	0	CD209	26	455	1.04878
2	B15	DMSO	0	CD209	26	456	1.09819
2	B15	DMSO	0	CD209	26	457	1.0701
2	B15	DMSO	0	CD209	26	458	1.07389
2	B15	DMSO	0	CD209	26	459	1.06576
2	B15	DMSO	0	CD209	26	460	1.06357
2	B15	DMSO	0	CD209	26	461	1.0788
2	B15	DMSO	0	CD209	26	462	1.06264
2	B15	DMSO	0	CD209	26	463	1.06026
2	B15	DMSO	0	CD209	26	464	1.07712
2	B15	DMSO	0	CD209	26	465	1.07176
2	B15	DMSO	0	CD209	26	466	1.06791
2	B15	DMSO	0	CD209	26	467	1.07406
2	B15	DMSO	0	CD209	26	468	1.05823
2	B15	DMSO	0	CD209	26	469	1.05695
2	B15	DMSO	0	CD209	26	470	1.06115
2	B15	DMSO	0	CD209	26	471	1.0571
2	B15	DMSO	0	CD209	26	472	1.08126
2	B15	DMSO	0	CD209	26	473	1.06179
2	B15	DMSO	0	CD209	26	474	1.06161
2	B15	DMSO	0	CD209	26	475	1.06819
2	B15	DMSO	0	CD209	26	476	1.06496
2	B15	DMSO	0	CD209	26	477	1.07626
2	B15	DMSO	0	CD209	26	478	1.06545
2	B15	DMSO	0	CD209	26	479	1.05994
2	B15	DMSO	0	CD209	26	480	1.06267
2	B15	DMSO	0	CD209	26	481	1.06725
2	B15	DMSO	0	CD209	26	482	1.05509
2	B15	DMSO	0	CD209	26	483	1.06683
2	B15	DMSO	0	CD209	26	484	1.0678
2	B15	DMSO	0	CD209	26	485	1.06286
2	B15	DMSO	0	CD209	26	486	1.07195
2	B15	DMSO	0	CD209	26	487	1.06099
2	B15	DMSO	0	CD209	26	488	1.10983
2	B15	DMSO	0	CD209	26	489	1.06774
2	B15	DMSO	0	CD209	26	490	1.06833
2	B15	DMSO	0	CD209	26	491	1.05984
2	B15	DMSO	0	CD209	26	492	1.07152
2	B15	DMSO	0	CD209	26	493	1.06423
2	B15	DMSO	0	CD209	26	494	1.06362
2	B15	DMSO	0	CD209	26	495	1.06277
2	B15	DMSO	0	CD209	26	496	1.05772
2	B15	DMSO	0	CD209	26	497	1.06238
2	B15	DMSO	0	CD209	26	498	1.06419
2	B15	DMSO	0	CD209	26	499	1.06114
2	B15	DMSO	0	CD209	26	500	1.06517
2	B15	DMSO	0	CD209	26	501	1.05216
2	B15	DMSO	0	CD209	26	502	1.06468
2	B15	DMSO	0	CD209	26	503	1.06004
2	B15	DMSO	0	CD209	26	504	1.05468
2	B15	DMSO	0	CD209	26	505	1.05857
2	B15	DMSO	0	CD209	26	506	1.06536
2	B15	DMSO	0	CD209	26	507	1.06504
2	B15	DMSO	0	CD209	26	508	1.06289
2	B15	DMSO	0	CD209	26	509	1.06022
2	B15	DMSO	0	CD209	26	510	1.0639
2	B15	DMSO	0	CD209	26	511	1.06315
2	B15	DMSO	0	CD209	26	512	1.06158
2	B15	DMSO	0	CD209	26	513	1.06017
2	B15	DMSO	0	CD209	26	515	1.06842
2	B15	DMSO	0	CD209	26	516	1.05974
2	B15	DMSO	0	CD209	26	517	1.06188
2	B15	DMSO	0	CD209	26	518	1.05121
2	B15	DMSO	0	CD209	26	519	1.0734
2	B15	DMSO	0	CD209	26	520	1.05321
2	B15	DMSO	0	CD209	26	521	1.07116
2	B15	DMSO	0	CD209	26	522	1.05529
2	B15	DMSO	0	CD209	26	523	1.06266
2	B15	DMSO	0	CD209	26	524	1.06312
2	B15	DMSO	0	CD209	26	525	1.05755
2	B15	DMSO	0	CD209	26	526	1.05564
2	B15	DMSO	0	CD209	26	527	1.0587
2	B15	DMSO	0	CD209	26	528	1.05926
2	B15	DMSO	0	CD209	26	529	1.07983
2	B15	DMSO	0	CD209	26	530	1.05409
2	B15	DMSO	0	CD209	26	531	1.06567
2	B15	DMSO	0	CD209	26	532	1.06178
2	B15	DMSO	0	CD209	26	533	1.07439
2	B15	DMSO	0	CD209	26	534	1.0561
2	B15	DMSO	0	CD209	26	535	1.06328
2	B15	DMSO	0	CD209	26	536	1.06965
2	B15	DMSO	0	CD209	26	537	1.07247
2	B15	DMSO	0	CD209	26	538	1.0662
2	B15	DMSO	0	CD209	26	539	1.11335
2	B15	DMSO	0	CD209	26	540	1.06144
2	B15	DMSO	0	CD209	26	541	1.07422
2	B15	DMSO	0	CD209	26	542	1.05757
2	B15	DMSO	0	CD209	26	543	1.06338
2	B15	DMSO	0	CD209	26	544	1.06091
2	B15	DMSO	0	CD209	26	545	1.06011
2	B15	DMSO	0	CD209	26	546	1.0637
2	B15	DMSO	0	CD209	26	547	1.05573
2	B15	DMSO	0	CD209	26	548	1.05595
2	B15	DMSO	0	CD209	26	549	1.05567
2	B15	DMSO	0	CD209	26	550	1.05866
2	B15	DMSO	0	CD209	26	551	1.08696
2	B15	DMSO	0	CD209	26	552	1.06868
2	B15	DMSO	0	CD209	26	553	1.06187
2	B15	DMSO	0	CD209	26	554	1.06794
2	B15	DMSO	0	CD209	26	555	1.08919
2	B15	DMSO	0	CD209	26	556	1.29778
2	B15	DMSO	0	CD209	26	557	1.08878
2	B15	DMSO	0	CD209	26	558	1.06167
2	B15	DMSO	0	CD209	26	559	1.06796
2	B15	DMSO	0	CD209	26	560	1.0613
2	B15	DMSO	0	CD209	26	561	1.23393
2	B15	DMSO	0	CD209	26	562	1.18968
2	B15	DMSO	0	CD209	26	564	1.06455
2	B15	DMSO	0	CD209	26	565	1.0672
2	B15	DMSO	0	CD209	26	566	1.07083
2	B15	DMSO	0	CD209	26	567	1.21904
2	B15	DMSO	0	CD209	26	568	1.07882
2	B15	DMSO	0	CD209	26	569	1.09797
2	B15	DMSO	0	CD209	26	570	1.05397
2	B15	DMSO	0	CD209	26	571	1.07678
2	B15	DMSO	0	CD209	26	572	1.22845
2	B15	DMSO	0	CD209	26	573	1.06816
2	B15	DMSO	0	CD209	26	574	1.06496
2	B15	DMSO	0	CD209	26	575	1.06337
2	B15	DMSO	0	CD209	26	576	1.06085
2	B15	DMSO	0	CD209	26	577	1.10506
2	B15	DMSO	0	CD209	26	578	1.07808
2	B15	DMSO	0	CD209	26	579	1.13922
2	B15	DMSO	0	CD209	26	580	1.06361
2	B15	DMSO	0	CD209	26	581	1.06175
2	B15	DMSO	0	CD209	26	582	1.06707
2	B15	DMSO	0	CD209	26	584	1.07176
2	B15	DMSO	0	CD209	26	585	1.06364
2	B15	DMSO	0	CD209	26	586	1.06269
2	B15	DMSO	0	CD209	26	587	1.05847
2	B15	DMSO	0	CD209	26	588	1.1282
2	B15	DMSO	0	CD209	26	589	1.06695
2	B15	DMSO	0	CD209	26	590	1.05783
2	B15	DMSO	0	CD209	26	591	1.056
2	B15	DMSO	0	CD209	26	592	1.06287
2	B15	DMSO	0	CD209	26	593	1.05703
2	B15	DMSO	0	CD209	26	594	1.05577
2	B15	DMSO	0	CD209	26	595	1.06341
2	B15	DMSO	0	CD209	26	596	1.05887
2	B15	DMSO	0	CD209	26	597	1.06787
2	B15	DMSO	0	CD209	26	598	1.07428
2	B15	DMSO	0	CD209	26	599	1.06082
2	B15	DMSO	0	CD209	26	600	1.07015
2	B15	DMSO	0	CD209	26	601	1.06722
2	B15	DMSO	0	CD209	26	602	1.05883
2	B15	DMSO	0	CD209	26	603	1.08571
2	B15	DMSO	0	CD209	26	604	1.06535
2	B15	DMSO	0	CD209	26	605	1.06737
2	B15	DMSO	0	CD209	26	606	1.05899
2	B15	DMSO	0	CD209	26	607	1.06999
2	B15	DMSO	0	CD209	26	608	1.06146
2	B15	DMSO	0	CD209	26	609	1.05426
2	B15	DMSO	0	CD209	26	610	1.06147
2	B15	DMSO	0	CD209	26	611	1.05996
2	B15	DMSO	0	CD209	26	612	1.06223
2	B15	DMSO	0	CD209	26	613	1.05954
2	B15	DMSO	0	CD209	26	614	1.05401
2	B15	DMSO	0	CD209	26	615	1.07097
2	B15	DMSO	0	CD209	26	616	1.05999
2	B15	DMSO	0	CD209	26	617	1.06731
2	B15	DMSO	0	CD209	26	618	1.06733
2	B15	DMSO	0	CD209	26	619	1.06736
2	B15	DMSO	0	CD209	26	620	1.06101
2	B15	DMSO	0	CD209	26	621	1.06307
2	B15	DMSO	0	CD209	26	622	1.07159
2	B15	DMSO	0	CD209	26	623	1.06
2	B15	DMSO	0	CD209	26	624	1.05934
2	B15	DMSO	0	CD209	26	625	1.06627
2	B15	DMSO	0	CD209	26	626	1.061
2	B15	DMSO	0	CD209	26	627	1.06248
2	B15	DMSO	0	CD209	26	628	1.06044
2	B15	DMSO	0	CD209	26	629	1.08879
2	B15	DMSO	0	CD209	26	630	1.05095
2	B15	DMSO	0	CD209	26	631	1.11544
2	B15	DMSO	0	CD209	26	632	1.0564
2	B15	DMSO	0	CD209	26	633	1.0528
2	B15	DMSO	0	CD209	26	634	1.05624
2	B15	DMSO	0	CD209	26	635	1.07956
2	B15	DMSO	0	CD209	26	636	1.09438
2	B15	DMSO	0	CD209	26	637	1.08836
2	B15	DMSO	0	CD209	26	638	1.08065
2	B15	DMSO	0	CD209	26	639	1.06534
2	B15	DMSO	0	CD209	26	640	1.05317
2	B15	DMSO	0	CD209	26	641	1.07177
2	B15	DMSO	0	CD209	26	642	1.07572
1	B16	DMSO	0	CD209	27	1	1.07083
1	B16	DMSO	0	CD209	27	2	1.0531
1	B16	DMSO	0	CD209	27	3	1.07487
1	B16	DMSO	0	CD209	27	4	1.0584
1	B16	DMSO	0	CD209	27	5	1.07379
1	B16	DMSO	0	CD209	27	6	1.10255
1	B16	DMSO	0	CD209	27	7	1.06157
1	B16	DMSO	0	CD209	27	8	1.09534
1	B16	DMSO	0	CD209	27	9	1.0569
1	B16	DMSO	0	CD209	27	10	1.05484
1	B16	DMSO	0	CD209	27	11	1.06771
1	B16	DMSO	0	CD209	27	12	1.05791
1	B16	DMSO	0	CD209	27	13	1.07227
1	B16	DMSO	0	CD209	27	14	1.06229
1	B16	DMSO	0	CD209	27	15	1.08741
1	B16	DMSO	0	CD209	27	16	1.05706
1	B16	DMSO	0	CD209	27	17	1.05769
1	B16	DMSO	0	CD209	27	18	1.06945
1	B16	DMSO	0	CD209	27	19	1.08016
1	B16	DMSO	0	CD209	27	20	1.07378
1	B16	DMSO	0	CD209	27	21	1.0716
1	B16	DMSO	0	CD209	27	22	1.06354
1	B16	DMSO	0	CD209	27	23	1.06717
1	B16	DMSO	0	CD209	27	24	1.05412
1	B16	DMSO	0	CD209	27	25	1.07056
1	B16	DMSO	0	CD209	27	26	1.06608
1	B16	DMSO	0	CD209	27	27	1.06607
1	B16	DMSO	0	CD209	27	28	1.08606
1	B16	DMSO	0	CD209	27	29	1.06619
1	B16	DMSO	0	CD209	27	30	1.0776
1	B16	DMSO	0	CD209	27	31	1.06876
1	B16	DMSO	0	CD209	27	32	1.08693
1	B16	DMSO	0	CD209	27	33	1.07887
1	B16	DMSO	0	CD209	27	34	1.07467
1	B16	DMSO	0	CD209	27	35	1.08721
1	B16	DMSO	0	CD209	27	36	1.06335
1	B16	DMSO	0	CD209	27	37	1.07028
1	B16	DMSO	0	CD209	27	38	1.05789
1	B16	DMSO	0	CD209	27	39	1.05686
1	B16	DMSO	0	CD209	27	40	1.07648
1	B16	DMSO	0	CD209	27	41	1.06378
1	B16	DMSO	0	CD209	27	42	1.05973
1	B16	DMSO	0	CD209	27	43	1.06186
1	B16	DMSO	0	CD209	27	44	1.07105
1	B16	DMSO	0	CD209	27	45	1.12136
1	B16	DMSO	0	CD209	27	46	1.06941
1	B16	DMSO	0	CD209	27	47	1.0609
1	B16	DMSO	0	CD209	27	48	1.05898
1	B16	DMSO	0	CD209	27	49	1.06064
1	B16	DMSO	0	CD209	27	50	1.05981
1	B16	DMSO	0	CD209	27	51	1.0652
1	B16	DMSO	0	CD209	27	52	1.06589
1	B16	DMSO	0	CD209	27	53	1.07979
1	B16	DMSO	0	CD209	27	54	1.09281
1	B16	DMSO	0	CD209	27	55	1.06042
1	B16	DMSO	0	CD209	27	56	1.05937
1	B16	DMSO	0	CD209	27	57	1.06978
1	B16	DMSO	0	CD209	27	58	1.06257
1	B16	DMSO	0	CD209	27	59	1.1183
1	B16	DMSO	0	CD209	27	60	1.0603
1	B16	DMSO	0	CD209	27	61	1.05559
1	B16	DMSO	0	CD209	27	62	1.07042
1	B16	DMSO	0	CD209	27	63	1.05969
1	B16	DMSO	0	CD209	27	64	1.06132
1	B16	DMSO	0	CD209	27	65	1.06211
1	B16	DMSO	0	CD209	27	66	1.06081
1	B16	DMSO	0	CD209	27	67	1.062
1	B16	DMSO	0	CD209	27	68	1.06486
1	B16	DMSO	0	CD209	27	69	1.06242
1	B16	DMSO	0	CD209	27	70	1.06208
1	B16	DMSO	0	CD209	27	71	1.15231
1	B16	DMSO	0	CD209	27	72	1.05486
1	B16	DMSO	0	CD209	27	73	1.06951
1	B16	DMSO	0	CD209	27	74	1.0609
1	B16	DMSO	0	CD209	27	75	1.05523
1	B16	DMSO	0	CD209	27	76	1.05969
1	B16	DMSO	0	CD209	27	77	1.06085
1	B16	DMSO	0	CD209	27	78	1.05846
1	B16	DMSO	0	CD209	27	79	1.07226
1	B16	DMSO	0	CD209	27	80	1.06221
1	B16	DMSO	0	CD209	27	81	1.05681
1	B16	DMSO	0	CD209	27	82	1.06025
1	B16	DMSO	0	CD209	27	83	1.05853
1	B16	DMSO	0	CD209	27	84	1.06055
1	B16	DMSO	0	CD209	27	85	1.06647
1	B16	DMSO	0	CD209	27	86	1.06128
1	B16	DMSO	0	CD209	27	87	1.06265
1	B16	DMSO	0	CD209	27	88	1.06553
1	B16	DMSO	0	CD209	27	89	1.05699
1	B16	DMSO	0	CD209	27	90	1.05425
1	B16	DMSO	0	CD209	27	91	1.07012
1	B16	DMSO	0	CD209	27	92	1.06412
1	B16	DMSO	0	CD209	27	93	1.07107
1	B16	DMSO	0	CD209	27	94	1.06664
1	B16	DMSO	0	CD209	27	95	1.06862
1	B16	DMSO	0	CD209	27	96	1.06348
1	B16	DMSO	0	CD209	27	97	1.06458
1	B16	DMSO	0	CD209	27	98	1.07518
1	B16	DMSO	0	CD209	27	99	1.07979
1	B16	DMSO	0	CD209	27	100	1.06421
1	B16	DMSO	0	CD209	27	101	1.05934
1	B16	DMSO	0	CD209	27	102	1.08628
1	B16	DMSO	0	CD209	27	103	1.06728
1	B16	DMSO	0	CD209	27	104	1.05678
1	B16	DMSO	0	CD209	27	105	1.06527
1	B16	DMSO	0	CD209	27	106	1.06492
1	B16	DMSO	0	CD209	27	107	1.0633
1	B16	DMSO	0	CD209	27	108	1.06807
1	B16	DMSO	0	CD209	27	109	1.08195
1	B16	DMSO	0	CD209	27	110	1.06608
1	B16	DMSO	0	CD209	27	111	1.06142
1	B16	DMSO	0	CD209	27	112	1.06673
1	B16	DMSO	0	CD209	27	113	1.07687
1	B16	DMSO	0	CD209	27	114	1.06357
1	B16	DMSO	0	CD209	27	115	1.14899
1	B16	DMSO	0	CD209	27	116	1.0622
1	B16	DMSO	0	CD209	27	117	1.05796
1	B16	DMSO	0	CD209	27	118	1.06709
1	B16	DMSO	0	CD209	27	119	1.06472
1	B16	DMSO	0	CD209	27	120	1.22097
1	B16	DMSO	0	CD209	27	121	1.08063
1	B16	DMSO	0	CD209	27	122	1.06266
1	B16	DMSO	0	CD209	27	123	1.06902
1	B16	DMSO	0	CD209	27	124	1.06531
1	B16	DMSO	0	CD209	27	125	1.08224
1	B16	DMSO	0	CD209	27	126	1.07314
1	B16	DMSO	0	CD209	27	127	1.07796
1	B16	DMSO	0	CD209	27	128	1.0659
1	B16	DMSO	0	CD209	27	129	1.06048
1	B16	DMSO	0	CD209	27	130	1.06033
1	B16	DMSO	0	CD209	27	131	1.06405
1	B16	DMSO	0	CD209	27	132	1.06712
1	B16	DMSO	0	CD209	27	133	1.05831
1	B16	DMSO	0	CD209	27	134	1.11656
1	B16	DMSO	0	CD209	27	135	1.0611
1	B16	DMSO	0	CD209	27	136	1.07119
1	B16	DMSO	0	CD209	27	137	1.09689
1	B16	DMSO	0	CD209	27	138	1.06995
1	B16	DMSO	0	CD209	27	139	1.05876
1	B16	DMSO	0	CD209	27	140	1.07546
1	B16	DMSO	0	CD209	27	141	1.0799
1	B16	DMSO	0	CD209	27	142	1.07074
1	B16	DMSO	0	CD209	27	143	1.06921
1	B16	DMSO	0	CD209	27	144	1.05939
1	B16	DMSO	0	CD209	27	145	1.18612
1	B16	DMSO	0	CD209	27	146	1.05665
1	B16	DMSO	0	CD209	27	147	1.05562
1	B16	DMSO	0	CD209	27	148	1.06752
1	B16	DMSO	0	CD209	27	149	1.07167
1	B16	DMSO	0	CD209	27	150	1.08923
1	B16	DMSO	0	CD209	27	151	1.05517
1	B16	DMSO	0	CD209	27	152	1.05673
1	B16	DMSO	0	CD209	27	153	1.0622
1	B16	DMSO	0	CD209	27	154	1.06033
1	B16	DMSO	0	CD209	27	155	1.06017
1	B16	DMSO	0	CD209	27	156	1.06496
1	B16	DMSO	0	CD209	27	157	1.05818
1	B16	DMSO	0	CD209	27	158	1.05874
1	B16	DMSO	0	CD209	27	159	1.06975
1	B16	DMSO	0	CD209	27	160	1.13751
1	B16	DMSO	0	CD209	27	161	1.06855
1	B16	DMSO	0	CD209	27	162	1.10421
1	B16	DMSO	0	CD209	27	163	1.05597
1	B16	DMSO	0	CD209	27	164	1.05818
1	B16	DMSO	0	CD209	27	165	1.05756
1	B16	DMSO	0	CD209	27	166	1.05248
1	B16	DMSO	0	CD209	27	167	1.06249
1	B16	DMSO	0	CD209	27	168	1.07058
1	B16	DMSO	0	CD209	27	169	1.06722
1	B16	DMSO	0	CD209	27	170	1.06299
1	B16	DMSO	0	CD209	27	171	1.06151
1	B16	DMSO	0	CD209	27	172	1.09101
1	B16	DMSO	0	CD209	27	173	1.0919
1	B16	DMSO	0	CD209	27	174	1.06981
1	B16	DMSO	0	CD209	27	175	1.08046
1	B16	DMSO	0	CD209	27	176	1.07521
1	B16	DMSO	0	CD209	27	177	1.07321
1	B16	DMSO	0	CD209	27	178	1.05988
1	B16	DMSO	0	CD209	27	179	1.06454
1	B16	DMSO	0	CD209	27	180	1.06268
1	B16	DMSO	0	CD209	27	181	1.06391
1	B16	DMSO	0	CD209	27	182	1.06242
1	B16	DMSO	0	CD209	27	183	1.06173
1	B16	DMSO	0	CD209	27	184	1.15063
1	B16	DMSO	0	CD209	27	185	1.06201
1	B16	DMSO	0	CD209	27	186	1.05636
1	B16	DMSO	0	CD209	27	187	1.14897
1	B16	DMSO	0	CD209	27	188	1.06142
1	B16	DMSO	0	CD209	27	189	1.06155
1	B16	DMSO	0	CD209	27	190	1.13073
1	B16	DMSO	0	CD209	27	191	1.07303
1	B16	DMSO	0	CD209	27	192	1.06169
1	B16	DMSO	0	CD209	27	193	1.05251
1	B16	DMSO	0	CD209	27	194	1.06616
1	B16	DMSO	0	CD209	27	195	1.06036
1	B16	DMSO	0	CD209	27	196	1.07833
1	B16	DMSO	0	CD209	27	197	1.06356
1	B16	DMSO	0	CD209	27	198	1.11638
1	B16	DMSO	0	CD209	27	199	1.08241
1	B16	DMSO	0	CD209	27	200	1.06846
1	B16	DMSO	0	CD209	27	201	1.06407
1	B16	DMSO	0	CD209	27	202	1.07687
1	B16	DMSO	0	CD209	27	203	1.06602
1	B16	DMSO	0	CD209	27	204	1.07161
1	B16	DMSO	0	CD209	27	205	1.0577
1	B16	DMSO	0	CD209	27	206	1.07207
1	B16	DMSO	0	CD209	27	207	1.0831
1	B16	DMSO	0	CD209	27	208	1.0663
1	B16	DMSO	0	CD209	27	209	1.06943
1	B16	DMSO	0	CD209	27	210	1.06946
1	B16	DMSO	0	CD209	27	211	1.06778
1	B16	DMSO	0	CD209	27	212	1.06647
1	B16	DMSO	0	CD209	27	213	1.06057
1	B16	DMSO	0	CD209	27	214	1.12278
1	B16	DMSO	0	CD209	27	215	1.06109
1	B16	DMSO	0	CD209	27	216	1.07622
1	B16	DMSO	0	CD209	27	217	1.05827
1	B16	DMSO	0	CD209	27	218	1.05452
1	B16	DMSO	0	CD209	27	219	1.06202
1	B16	DMSO	0	CD209	27	220	1.05989
1	B16	DMSO	0	CD209	27	221	1.0773
1	B16	DMSO	0	CD209	27	222	1.05687
1	B16	DMSO	0	CD209	27	223	1.05705
1	B16	DMSO	0	CD209	27	224	1.06136
1	B16	DMSO	0	CD209	27	225	1.07956
1	B16	DMSO	0	CD209	27	226	1.0685
1	B16	DMSO	0	CD209	27	227	1.074
1	B16	DMSO	0	CD209	27	228	1.07382
1	B16	DMSO	0	CD209	27	229	1.08982
1	B16	DMSO	0	CD209	27	230	1.06331
1	B16	DMSO	0	CD209	27	231	1.06695
1	B16	DMSO	0	CD209	27	232	1.06196
1	B16	DMSO	0	CD209	27	233	1.14264
1	B16	DMSO	0	CD209	27	234	1.0921
1	B16	DMSO	0	CD209	27	235	1.06547
1	B16	DMSO	0	CD209	27	236	1.05914
1	B16	DMSO	0	CD209	27	237	1.07466
1	B16	DMSO	0	CD209	27	238	1.07306
1	B16	DMSO	0	CD209	27	239	1.13686
1	B16	DMSO	0	CD209	27	240	1.05409
1	B16	DMSO	0	CD209	27	241	1.05423
1	B16	DMSO	0	CD209	27	242	1.07697
1	B16	DMSO	0	CD209	27	243	1.05486
1	B16	DMSO	0	CD209	27	244	1.06333
1	B16	DMSO	0	CD209	27	245	1.06588
1	B16	DMSO	0	CD209	27	246	1.0689
1	B16	DMSO	0	CD209	27	247	1.05852
1	B16	DMSO	0	CD209	27	248	1.0801
1	B16	DMSO	0	CD209	27	249	1.06612
1	B16	DMSO	0	CD209	27	250	1.0685
1	B16	DMSO	0	CD209	27	251	1.06644
1	B16	DMSO	0	CD209	27	252	1.0563
1	B16	DMSO	0	CD209	27	253	1.0736
1	B16	DMSO	0	CD209	27	254	1.07687
1	B16	DMSO	0	CD209	27	255	1.08
1	B16	DMSO	0	CD209	27	256	1.09255
1	B16	DMSO	0	CD209	27	257	1.06633
1	B16	DMSO	0	CD209	27	258	1.05902
1	B16	DMSO	0	CD209	27	259	1.07492
1	B16	DMSO	0	CD209	27	260	1.08673
1	B16	DMSO	0	CD209	27	261	1.06724
1	B16	DMSO	0	CD209	27	262	1.05231
1	B16	DMSO	0	CD209	27	263	1.05929
1	B16	DMSO	0	CD209	27	264	1.06041
1	B16	DMSO	0	CD209	27	265	1.06505
1	B16	DMSO	0	CD209	27	266	1.0539
1	B16	DMSO	0	CD209	27	267	1.07718
1	B16	DMSO	0	CD209	27	268	1.06345
1	B16	DMSO	0	CD209	27	269	1.07387
1	B16	DMSO	0	CD209	27	270	1.06201
1	B16	DMSO	0	CD209	27	271	1.0571
1	B16	DMSO	0	CD209	27	272	1.05852
1	B16	DMSO	0	CD209	27	273	1.05089
1	B16	DMSO	0	CD209	27	274	1.06183
1	B16	DMSO	0	CD209	27	275	1.07311
1	B16	DMSO	0	CD209	27	276	1.132
1	B16	DMSO	0	CD209	27	277	1.1227
1	B16	DMSO	0	CD209	27	278	1.06381
1	B16	DMSO	0	CD209	27	279	1.05785
1	B16	DMSO	0	CD209	27	280	1.05861
1	B16	DMSO	0	CD209	27	281	1.0615
1	B16	DMSO	0	CD209	27	282	1.15017
1	B16	DMSO	0	CD209	27	283	1.0767
1	B16	DMSO	0	CD209	27	284	1.07756
1	B16	DMSO	0	CD209	27	285	1.06583
1	B16	DMSO	0	CD209	27	286	1.10823
1	B16	DMSO	0	CD209	27	287	1.0723
1	B16	DMSO	0	CD209	27	288	1.05857
1	B16	DMSO	0	CD209	27	289	1.06444
1	B16	DMSO	0	CD209	27	290	1.11061
1	B16	DMSO	0	CD209	27	291	1.05356
1	B16	DMSO	0	CD209	27	292	1.06383
1	B16	DMSO	0	CD209	27	293	1.06881
1	B16	DMSO	0	CD209	27	294	1.06736
1	B16	DMSO	0	CD209	27	295	1.06742
1	B16	DMSO	0	CD209	27	296	1.06338
1	B16	DMSO	0	CD209	27	297	1.06054
1	B16	DMSO	0	CD209	27	298	1.09295
1	B16	DMSO	0	CD209	27	299	1.06348
1	B16	DMSO	0	CD209	27	300	1.06412
1	B16	DMSO	0	CD209	27	301	1.16248
1	B16	DMSO	0	CD209	27	302	1.06563
1	B16	DMSO	0	CD209	27	303	1.42646
1	B16	DMSO	0	CD209	27	304	1.09037
1	B16	DMSO	0	CD209	27	305	1.15967
1	B16	DMSO	0	CD209	27	306	1.06641
1	B16	DMSO	0	CD209	27	307	1.07805
1	B16	DMSO	0	CD209	27	308	1.06797
1	B16	DMSO	0	CD209	27	309	1.0581
1	B16	DMSO	0	CD209	27	310	1.06243
1	B16	DMSO	0	CD209	27	311	1.07188
1	B16	DMSO	0	CD209	27	312	1.06367
1	B16	DMSO	0	CD209	27	313	1.0702
1	B16	DMSO	0	CD209	27	314	1.06691
1	B16	DMSO	0	CD209	27	315	1.06203
1	B16	DMSO	0	CD209	27	316	1.05316
1	B16	DMSO	0	CD209	27	317	1.06842
1	B16	DMSO	0	CD209	27	318	1.0651
1	B16	DMSO	0	CD209	27	319	1.09493
1	B16	DMSO	0	CD209	27	320	1.0703
1	B16	DMSO	0	CD209	27	321	1.05917
1	B16	DMSO	0	CD209	27	322	1.11336
1	B16	DMSO	0	CD209	27	323	1.07179
1	B16	DMSO	0	CD209	27	324	1.19043
1	B16	DMSO	0	CD209	27	325	1.06798
1	B16	DMSO	0	CD209	27	326	1.05593
1	B16	DMSO	0	CD209	27	327	1.07387
1	B16	DMSO	0	CD209	27	328	1.06373
1	B16	DMSO	0	CD209	27	329	1.05766
1	B16	DMSO	0	CD209	27	330	1.05783
1	B16	DMSO	0	CD209	27	331	1.08735
1	B16	DMSO	0	CD209	27	332	1.07355
1	B16	DMSO	0	CD209	27	333	1.07369
1	B16	DMSO	0	CD209	27	334	1.07305
1	B16	DMSO	0	CD209	27	335	1.08325
1	B16	DMSO	0	CD209	27	336	1.0748
1	B16	DMSO	0	CD209	27	337	1.07627
1	B16	DMSO	0	CD209	27	338	1.05998
1	B16	DMSO	0	CD209	27	339	1.0582
1	B16	DMSO	0	CD209	27	340	1.06031
1	B16	DMSO	0	CD209	27	341	1.06204
1	B16	DMSO	0	CD209	27	342	1.06139
1	B16	DMSO	0	CD209	27	343	1.08503
1	B16	DMSO	0	CD209	27	344	1.06675
1	B16	DMSO	0	CD209	27	345	1.06037
1	B16	DMSO	0	CD209	27	346	1.07558
1	B16	DMSO	0	CD209	27	347	1.06855
1	B16	DMSO	0	CD209	27	348	1.07339
1	B16	DMSO	0	CD209	27	349	1.0691
1	B16	DMSO	0	CD209	27	350	1.0614
1	B16	DMSO	0	CD209	27	351	1.06825
1	B16	DMSO	0	CD209	27	352	1.05701
1	B16	DMSO	0	CD209	27	353	1.07097
1	B16	DMSO	0	CD209	27	354	1.05964
1	B16	DMSO	0	CD209	27	355	1.0753
1	B16	DMSO	0	CD209	27	356	1.06644
1	B16	DMSO	0	CD209	27	357	1.19918
1	B16	DMSO	0	CD209	27	358	1.06428
1	B16	DMSO	0	CD209	27	359	1.07334
1	B16	DMSO	0	CD209	27	360	1.05647
1	B16	DMSO	0	CD209	27	361	1.07191
1	B16	DMSO	0	CD209	27	362	1.05938
1	B16	DMSO	0	CD209	27	363	1.06275
1	B16	DMSO	0	CD209	27	364	1.06078
1	B16	DMSO	0	CD209	27	365	1.06714
1	B16	DMSO	0	CD209	27	366	1.07111
1	B16	DMSO	0	CD209	27	367	1.06789
1	B16	DMSO	0	CD209	27	368	1.05659
1	B16	DMSO	0	CD209	27	369	1.13556
1	B16	DMSO	0	CD209	27	370	1.06734
1	B16	DMSO	0	CD209	27	371	1.05695
1	B16	DMSO	0	CD209	27	372	1.06035
1	B16	DMSO	0	CD209	27	373	1.06056
1	B16	DMSO	0	CD209	27	374	1.06028
1	B16	DMSO	0	CD209	27	375	1.07182
1	B16	DMSO	0	CD209	27	376	1.13861
1	B16	DMSO	0	CD209	27	377	1.11381
1	B16	DMSO	0	CD209	27	378	1.05781
1	B16	DMSO	0	CD209	27	379	1.05954
1	B16	DMSO	0	CD209	27	380	1.06377
1	B16	DMSO	0	CD209	27	381	1.07756
1	B16	DMSO	0	CD209	27	382	1.08921
1	B16	DMSO	0	CD209	27	383	1.07194
1	B16	DMSO	0	CD209	27	384	1.07409
1	B16	DMSO	0	CD209	27	385	1.0783
1	B16	DMSO	0	CD209	27	386	1.06461
1	B16	DMSO	0	CD209	27	387	1.07141
1	B16	DMSO	0	CD209	27	388	1.06713
1	B16	DMSO	0	CD209	27	389	1.0549
1	B16	DMSO	0	CD209	27	390	1.06207
1	B16	DMSO	0	CD209	27	391	1.16149
1	B16	DMSO	0	CD209	27	392	1.06068
1	B16	DMSO	0	CD209	27	393	1.06441
1	B16	DMSO	0	CD209	27	394	1.06086
1	B16	DMSO	0	CD209	27	395	1.17181
1	B16	DMSO	0	CD209	27	396	1.06371
1	B16	DMSO	0	CD209	27	397	1.06571
1	B16	DMSO	0	CD209	27	398	1.06223
1	B16	DMSO	0	CD209	27	399	1.06178
1	B16	DMSO	0	CD209	27	400	1.10153
1	B16	DMSO	0	CD209	27	401	1.06457
1	B16	DMSO	0	CD209	27	402	1.05954
1	B16	DMSO	0	CD209	27	403	1.07283
1	B16	DMSO	0	CD209	27	404	1.07087
1	B16	DMSO	0	CD209	27	405	1.06016
1	B16	DMSO	0	CD209	27	406	1.07174
1	B16	DMSO	0	CD209	27	407	1.08027
1	B16	DMSO	0	CD209	27	408	1.06263
1	B16	DMSO	0	CD209	27	409	1.06141
1	B16	DMSO	0	CD209	27	410	1.06051
1	B16	DMSO	0	CD209	27	411	1.06346
1	B16	DMSO	0	CD209	27	412	1.19554
1	B16	DMSO	0	CD209	27	413	1.35672
1	B16	DMSO	0	CD209	27	414	1.05681
1	B16	DMSO	0	CD209	27	415	1.17026
1	B16	DMSO	0	CD209	27	416	1.06272
1	B16	DMSO	0	CD209	27	417	1.07653
1	B16	DMSO	0	CD209	27	418	1.06089
1	B16	DMSO	0	CD209	27	419	1.07965
1	B16	DMSO	0	CD209	27	420	1.05757
1	B16	DMSO	0	CD209	27	421	1.0598
1	B16	DMSO	0	CD209	27	422	1.05817
1	B16	DMSO	0	CD209	27	423	1.06772
1	B16	DMSO	0	CD209	27	424	1.13796
1	B16	DMSO	0	CD209	27	425	1.0697
1	B16	DMSO	0	CD209	27	426	1.06477
1	B16	DMSO	0	CD209	27	427	1.05586
1	B16	DMSO	0	CD209	27	428	1.06642
1	B16	DMSO	0	CD209	27	429	1.06658
1	B16	DMSO	0	CD209	27	430	1.05757
1	B16	DMSO	0	CD209	27	431	1.07287
1	B16	DMSO	0	CD209	27	432	1.06628
1	B16	DMSO	0	CD209	27	433	1.05693
1	B16	DMSO	0	CD209	27	434	1.05828
1	B16	DMSO	0	CD209	27	435	1.06561
1	B16	DMSO	0	CD209	27	436	1.07117
1	B16	DMSO	0	CD209	27	437	1.05432
1	B16	DMSO	0	CD209	27	438	1.06686
1	B16	DMSO	0	CD209	27	439	1.06469
1	B16	DMSO	0	CD209	27	440	1.07217
1	B16	DMSO	0	CD209	27	441	1.0633
1	B16	DMSO	0	CD209	27	442	1.05361
1	B16	DMSO	0	CD209	27	443	1.07048
1	B16	DMSO	0	CD209	27	444	1.06804
1	B16	DMSO	0	CD209	27	445	1.05826
1	B16	DMSO	0	CD209	27	446	1.06544
1	B16	DMSO	0	CD209	27	447	1.064
1	B16	DMSO	0	CD209	27	449	1.08358
1	B16	DMSO	0	CD209	27	450	1.06135
1	B16	DMSO	0	CD209	27	451	1.07074
1	B16	DMSO	0	CD209	27	452	1.05624
1	B16	DMSO	0	CD209	27	453	1.05879
1	B16	DMSO	0	CD209	27	454	1.06427
1	B16	DMSO	0	CD209	27	455	1.0587
1	B16	DMSO	0	CD209	27	456	1.06448
1	B16	DMSO	0	CD209	27	457	1.06066
1	B16	DMSO	0	CD209	27	458	1.06375
1	B16	DMSO	0	CD209	27	459	1.10304
1	B16	DMSO	0	CD209	27	460	1.06918
1	B16	DMSO	0	CD209	27	461	1.06349
1	B16	DMSO	0	CD209	27	462	1.0615
1	B16	DMSO	0	CD209	27	463	1.0673
1	B16	DMSO	0	CD209	27	464	1.07402
1	B16	DMSO	0	CD209	27	465	1.06105
1	B16	DMSO	0	CD209	27	466	1.05662
1	B16	DMSO	0	CD209	27	467	1.05929
1	B16	DMSO	0	CD209	27	468	1.06954
1	B16	DMSO	0	CD209	27	469	1.06429
1	B16	DMSO	0	CD209	27	470	1.06863
1	B16	DMSO	0	CD209	27	471	1.06566
1	B16	DMSO	0	CD209	27	472	1.06352
1	B16	DMSO	0	CD209	27	473	1.12655
1	B16	DMSO	0	CD209	27	474	1.07049
1	B16	DMSO	0	CD209	27	475	1.06387
1	B16	DMSO	0	CD209	27	476	1.05495
1	B16	DMSO	0	CD209	27	477	1.0564
1	B16	DMSO	0	CD209	27	478	1.05817
1	B16	DMSO	0	CD209	27	479	1.06046
1	B16	DMSO	0	CD209	27	480	1.0704
1	B16	DMSO	0	CD209	27	481	1.07871
1	B16	DMSO	0	CD209	27	482	1.07223
1	B16	DMSO	0	CD209	27	483	1.06799
1	B16	DMSO	0	CD209	27	484	1.06736
1	B16	DMSO	0	CD209	27	485	1.06977
1	B16	DMSO	0	CD209	27	486	1.10294
1	B16	DMSO	0	CD209	27	487	1.05971
1	B16	DMSO	0	CD209	27	488	1.05626
1	B16	DMSO	0	CD209	27	489	1.07512
1	B16	DMSO	0	CD209	27	490	1.06526
1	B16	DMSO	0	CD209	27	491	1.05579
1	B16	DMSO	0	CD209	27	492	1.05391
1	B16	DMSO	0	CD209	27	493	1.06749
1	B16	DMSO	0	CD209	27	494	1.06662
1	B16	DMSO	0	CD209	27	495	1.05345
1	B16	DMSO	0	CD209	27	496	1.05828
1	B16	DMSO	0	CD209	27	497	1.06574
1	B16	DMSO	0	CD209	27	498	1.05961
1	B16	DMSO	0	CD209	27	499	1.06422
1	B16	DMSO	0	CD209	27	500	1.0579
1	B16	DMSO	0	CD209	27	501	1.06424
1	B16	DMSO	0	CD209	27	502	1.06438
1	B16	DMSO	0	CD209	27	503	1.08438
1	B16	DMSO	0	CD209	27	504	1.0575
1	B16	DMSO	0	CD209	27	505	1.05667
1	B16	DMSO	0	CD209	27	506	1.06623
1	B16	DMSO	0	CD209	27	507	1.06025
1	B16	DMSO	0	CD209	27	508	1.12457
1	B16	DMSO	0	CD209	27	509	1.06181
1	B16	DMSO	0	CD209	27	510	1.05776
1	B16	DMSO	0	CD209	27	511	1.05801
1	B16	DMSO	0	CD209	27	512	1.06842
1	B16	DMSO	0	CD209	27	513	1.06458
1	B16	DMSO	0	CD209	27	514	1.07388
1	B16	DMSO	0	CD209	27	515	1.06322
1	B16	DMSO	0	CD209	27	516	1.07522
1	B16	DMSO	0	CD209	27	517	1.0694
1	B16	DMSO	0	CD209	27	518	1.05963
1	B16	DMSO	0	CD209	27	519	1.06769
1	B16	DMSO	0	CD209	27	520	1.07063
1	B16	DMSO	0	CD209	27	521	1.16427
1	B16	DMSO	0	CD209	27	522	1.07257
1	B16	DMSO	0	CD209	27	523	1.06009
1	B16	DMSO	0	CD209	27	524	1.05389
1	B16	DMSO	0	CD209	27	525	1.05938
1	B16	DMSO	0	CD209	27	526	1.1027
1	B16	DMSO	0	CD209	27	527	1.06414
1	B16	DMSO	0	CD209	27	528	1.06715
1	B16	DMSO	0	CD209	27	529	1.07547
1	B16	DMSO	0	CD209	27	530	1.08107
1	B16	DMSO	0	CD209	27	531	1.06383
1	B16	DMSO	0	CD209	27	532	1.08929
1	B16	DMSO	0	CD209	27	533	1.23873
1	B16	DMSO	0	CD209	27	534	1.05723
1	B16	DMSO	0	CD209	27	535	1.1116
1	B16	DMSO	0	CD209	27	536	1.07218
1	B16	DMSO	0	CD209	27	537	1.05857
1	B16	DMSO	0	CD209	27	538	1.05902
1	B16	DMSO	0	CD209	27	539	1.0939
1	B16	DMSO	0	CD209	27	540	1.05699
1	B16	DMSO	0	CD209	27	541	1.0959
1	B16	DMSO	0	CD209	27	542	1.05911
1	B16	DMSO	0	CD209	27	543	1.06603
1	B16	DMSO	0	CD209	27	544	1.0846
1	B16	DMSO	0	CD209	27	545	1.06409
1	B16	DMSO	0	CD209	27	546	1.12839
1	B16	DMSO	0	CD209	27	547	1.0579
1	B16	DMSO	0	CD209	27	548	1.06752
1	B16	DMSO	0	CD209	27	549	1.06998
1	B16	DMSO	0	CD209	27	550	1.09169
1	B16	DMSO	0	CD209	27	551	1.06028
1	B16	DMSO	0	CD209	27	552	1.07388
1	B16	DMSO	0	CD209	27	553	1.05473
1	B16	DMSO	0	CD209	27	554	1.07831
1	B16	DMSO	0	CD209	27	555	1.05643
1	B16	DMSO	0	CD209	27	556	1.06836
1	B16	DMSO	0	CD209	27	557	1.05981
1	B16	DMSO	0	CD209	27	558	1.09238
1	B16	DMSO	0	CD209	27	559	1.06254
1	B16	DMSO	0	CD209	27	560	1.05942
1	B16	DMSO	0	CD209	27	561	1.05833
1	B16	DMSO	0	CD209	27	562	1.06302
1	B16	DMSO	0	CD209	27	563	1.06539
1	B16	DMSO	0	CD209	27	564	1.11775
1	B16	DMSO	0	CD209	27	565	1.06603
1	B16	DMSO	0	CD209	27	566	1.05907
1	B16	DMSO	0	CD209	27	567	1.05814
1	B16	DMSO	0	CD209	27	568	1.05842
1	B16	DMSO	0	CD209	27	569	1.0615
1	B16	DMSO	0	CD209	27	570	1.0597
1	B16	DMSO	0	CD209	27	571	1.06812
1	B16	DMSO	0	CD209	27	572	1.06207
1	B16	DMSO	0	CD209	27	573	1.07769
1	B16	DMSO	0	CD209	27	574	1.12249
1	B16	DMSO	0	CD209	27	575	1.06373
1	B16	DMSO	0	CD209	27	576	1.05285
1	B16	DMSO	0	CD209	27	577	1.07173
1	B16	DMSO	0	CD209	27	578	1.06252
1	B16	DMSO	0	CD209	27	579	1.06682
1	B16	DMSO	0	CD209	27	580	1.06123
1	B16	DMSO	0	CD209	27	581	1.05919
1	B16	DMSO	0	CD209	27	582	1.06188
1	B16	DMSO	0	CD209	27	583	1.06766
1	B16	DMSO	0	CD209	27	584	1.08707
1	B16	DMSO	0	CD209	27	585	1.09567
1	B16	DMSO	0	CD209	27	586	1.07082
1	B16	DMSO	0	CD209	27	587	1.1996
1	B16	DMSO	0	CD209	27	588	1.05349
1	B16	DMSO	0	CD209	27	589	1.09837
1	B16	DMSO	0	CD209	27	590	1.06208
1	B16	DMSO	0	CD209	27	591	1.06599
1	B16	DMSO	0	CD209	27	592	1.06019
1	B16	DMSO	0	CD209	27	593	1.05526
1	B16	DMSO	0	CD209	27	594	1.06474
1	B16	DMSO	0	CD209	27	595	1.06363
1	B16	DMSO	0	CD209	27	596	1.27901
1	B16	DMSO	0	CD209	27	597	1.13895
1	B16	DMSO	0	CD209	27	598	1.06321
1	B16	DMSO	0	CD209	27	599	1.06683
1	B16	DMSO	0	CD209	27	600	1.06528
1	B16	DMSO	0	CD209	27	601	1.06019
1	B16	DMSO	0	CD209	27	602	1.06615
1	B16	DMSO	0	CD209	27	603	1.0547
1	B16	DMSO	0	CD209	27	604	1.06395
1	B16	DMSO	0	CD209	27	605	1.05443
1	B16	DMSO	0	CD209	27	606	1.06002
1	B16	DMSO	0	CD209	27	607	1.05779
1	B16	DMSO	0	CD209	27	608	1.06437
1	B16	DMSO	0	CD209	27	609	1.06252
1	B16	DMSO	0	CD209	27	610	1.11041
1	B16	DMSO	0	CD209	27	611	1.06095
1	B16	DMSO	0	CD209	27	612	1.05932
1	B16	DMSO	0	CD209	27	613	1.0739
1	B16	DMSO	0	CD209	27	614	1.34278
1	B16	DMSO	0	CD209	27	615	1.061
1	B16	DMSO	0	CD209	27	616	1.06106
1	B16	DMSO	0	CD209	27	617	1.04962
1	B16	DMSO	0	CD209	27	618	1.06089
1	B16	DMSO	0	CD209	27	619	1.07177
1	B16	DMSO	0	CD209	27	620	1.07068
1	B16	DMSO	0	CD209	27	621	1.05945
1	B16	DMSO	0	CD209	27	622	1.06881
1	B16	DMSO	0	CD209	27	623	1.05594
1	B16	DMSO	0	CD209	27	624	1.07377
1	B16	DMSO	0	CD209	27	625	1.05997
1	B16	DMSO	0	CD209	27	626	1.18623
1	B16	DMSO	0	CD209	27	627	1.06243
1	B16	DMSO	0	CD209	27	628	1.08188
1	B16	DMSO	0	CD209	27	629	1.06264
1	B16	DMSO	0	CD209	27	630	1.0847
1	B16	DMSO	0	CD209	27	631	1.0575
1	B16	DMSO	0	CD209	27	632	1.103
1	B16	DMSO	0	CD209	27	633	1.05697
1	B16	DMSO	0	CD209	27	634	1.06588
1	B16	DMSO	0	CD209	27	635	1.05076
1	B16	DMSO	0	CD209	27	636	1.06714
1	B16	DMSO	0	CD209	27	637	1.0635
1	B16	DMSO	0	CD209	27	638	1.07072
1	B16	DMSO	0	CD209	27	639	1.06171
1	B16	DMSO	0	CD209	27	640	1.06247
1	B16	DMSO	0	CD209	27	641	1.07915
1	B16	DMSO	0	CD209	27	642	1.05907
1	B16	DMSO	0	CD209	27	643	1.05521
1	B16	DMSO	0	CD209	27	644	1.07101
1	B16	DMSO	0	CD209	27	645	1.07239
1	B16	DMSO	0	CD209	27	646	1.05966
1	B16	DMSO	0	CD209	27	647	1.06003
1	B16	DMSO	0	CD209	27	648	1.05954
1	B16	DMSO	0	CD209	27	649	1.05822
1	B16	DMSO	0	CD209	27	650	1.05704
1	B16	DMSO	0	CD209	27	651	1.07465
1	B16	DMSO	0	CD209	27	652	1.06018
1	B16	DMSO	0	CD209	27	653	1.06191
1	B16	DMSO	0	CD209	27	654	1.06092
1	B16	DMSO	0	CD209	27	655	1.06171
1	B16	DMSO	0	CD209	27	656	1.07368
1	B16	DMSO	0	CD209	27	657	1.07078
1	B16	DMSO	0	CD209	27	658	1.05989
1	B16	DMSO	0	CD209	27	659	1.0599
1	B16	DMSO	0	CD209	27	660	1.07064
1	B16	DMSO	0	CD209	27	661	1.06068
1	B16	DMSO	0	CD209	27	662	1.06651
1	B16	DMSO	0	CD209	27	663	1.05588
1	B16	DMSO	0	CD209	27	664	1.0535
1	B16	DMSO	0	CD209	27	665	1.06758
1	B16	DMSO	0	CD209	27	666	1.06536
1	B16	DMSO	0	CD209	27	667	1.07023
1	B16	DMSO	0	CD209	27	668	1.06249
1	B16	DMSO	0	CD209	27	669	1.06137
1	B16	DMSO	0	CD209	27	670	1.05841
1	B16	DMSO	0	CD209	27	671	1.07595
1	B16	DMSO	0	CD209	27	672	1.06849
1	B16	DMSO	0	CD209	27	673	1.07353
1	B16	DMSO	0	CD209	27	674	1.05715
1	B16	DMSO	0	CD209	27	675	1.06341
1	B16	DMSO	0	CD209	27	676	1.06821
1	B16	DMSO	0	CD209	27	677	1.06839
1	B16	DMSO	0	CD209	27	678	1.0615
1	B16	DMSO	0	CD209	27	679	1.05399
1	B16	DMSO	0	CD209	27	680	1.06343
1	B16	DMSO	0	CD209	27	681	1.0707
1	B16	DMSO	0	CD209	27	682	1.06232
1	B16	DMSO	0	CD209	27	683	1.05873
1	B16	DMSO	0	CD209	27	684	1.06648
1	B16	DMSO	0	CD209	27	685	1.06307
1	B16	DMSO	0	CD209	27	686	1.05638
1	B16	DMSO	0	CD209	27	687	1.06231
1	B16	DMSO	0	CD209	27	688	1.07098
1	B16	DMSO	0	CD209	27	689	1.06987
1	B16	DMSO	0	CD209	27	690	1.05679
1	B16	DMSO	0	CD209	27	691	1.06717
1	B16	DMSO	0	CD209	27	692	1.04749
1	B16	DMSO	0	CD209	27	693	1.06977
1	B16	DMSO	0	CD209	27	694	1.06483
1	B16	DMSO	0	CD209	27	695	1.05962
1	B16	DMSO	0	CD209	27	696	1.05982
1	B16	DMSO	0	CD209	27	697	1.07534
1	B16	DMSO	0	CD209	27	698	1.05855
1	B16	DMSO	0	CD209	27	699	1.06783
1	B16	DMSO	0	CD209	27	700	1.05649
1	B16	DMSO	0	CD209	27	701	1.05847
1	B16	DMSO	0	CD209	27	702	1.06204
1	B16	DMSO	0	CD209	27	703	1.07261
1	B16	DMSO	0	CD209	27	704	1.10894
1	B16	DMSO	0	CD209	27	705	1.06414
1	B16	DMSO	0	CD209	27	706	1.14447
1	B16	DMSO	0	CD209	27	707	1.06797
1	B16	DMSO	0	CD209	27	708	1.05453
1	B16	DMSO	0	CD209	27	709	1.06507
1	B16	DMSO	0	CD209	27	710	1.07005
1	B16	DMSO	0	CD209	27	711	1.08324
1	B16	DMSO	0	CD209	27	712	1.06624
1	B16	DMSO	0	CD209	27	713	1.06777
1	B16	DMSO	0	CD209	27	714	1.05428
1	B16	DMSO	0	CD209	27	715	1.05558
1	B16	DMSO	0	CD209	27	716	1.06789
1	B16	DMSO	0	CD209	27	717	1.06602
1	B16	DMSO	0	CD209	27	718	1.06147
1	B16	DMSO	0	CD209	27	719	1.06379
1	B16	DMSO	0	CD209	27	720	1.0668
1	B16	DMSO	0	CD209	27	721	1.061
1	B16	DMSO	0	CD209	27	722	1.06186
1	B16	DMSO	0	CD209	27	723	1.06263
1	B16	DMSO	0	CD209	27	724	1.08998
1	B16	DMSO	0	CD209	27	725	1.0668
1	B16	DMSO	0	CD209	27	726	1.05867
1	B16	DMSO	0	CD209	27	727	1.05953
1	B16	DMSO	0	CD209	27	728	1.0737
1	B16	DMSO	0	CD209	27	729	1.05675
1	B16	DMSO	0	CD209	27	730	1.06147
1	B16	DMSO	0	CD209	27	731	1.06102
1	B16	DMSO	0	CD209	27	732	1.06543
1	B16	DMSO	0	CD209	27	733	1.06107
2	B16	DMSO	0	CD209	28	2	1.08703
2	B16	DMSO	0	CD209	28	3	1.06359
2	B16	DMSO	0	CD209	28	4	1.05388
2	B16	DMSO	0	CD209	28	5	1.05461
2	B16	DMSO	0	CD209	28	6	1.06295
2	B16	DMSO	0	CD209	28	7	1.06239
2	B16	DMSO	0	CD209	28	8	1.05878
2	B16	DMSO	0	CD209	28	9	1.06614
2	B16	DMSO	0	CD209	28	10	1.08499
2	B16	DMSO	0	CD209	28	11	1.06032
2	B16	DMSO	0	CD209	28	12	1.05648
2	B16	DMSO	0	CD209	28	13	1.06237
2	B16	DMSO	0	CD209	28	14	1.07279
2	B16	DMSO	0	CD209	28	15	1.05597
2	B16	DMSO	0	CD209	28	16	1.06523
2	B16	DMSO	0	CD209	28	17	1.06785
2	B16	DMSO	0	CD209	28	18	1.0853
2	B16	DMSO	0	CD209	28	19	1.08539
2	B16	DMSO	0	CD209	28	20	1.06933
2	B16	DMSO	0	CD209	28	21	1.06007
2	B16	DMSO	0	CD209	28	22	1.06491
2	B16	DMSO	0	CD209	28	23	1.07723
2	B16	DMSO	0	CD209	28	24	1.0745
2	B16	DMSO	0	CD209	28	25	1.06412
2	B16	DMSO	0	CD209	28	26	1.05097
2	B16	DMSO	0	CD209	28	27	1.06094
2	B16	DMSO	0	CD209	28	28	1.06636
2	B16	DMSO	0	CD209	28	29	1.05917
2	B16	DMSO	0	CD209	28	30	1.06608
2	B16	DMSO	0	CD209	28	31	1.05932
2	B16	DMSO	0	CD209	28	32	1.09137
2	B16	DMSO	0	CD209	28	33	1.07908
2	B16	DMSO	0	CD209	28	34	1.06125
2	B16	DMSO	0	CD209	28	35	1.06815
2	B16	DMSO	0	CD209	28	36	1.06029
2	B16	DMSO	0	CD209	28	37	1.0705
2	B16	DMSO	0	CD209	28	38	1.05763
2	B16	DMSO	0	CD209	28	39	1.05858
2	B16	DMSO	0	CD209	28	40	1.09736
2	B16	DMSO	0	CD209	28	41	1.0549
2	B16	DMSO	0	CD209	28	42	1.06073
2	B16	DMSO	0	CD209	28	43	1.07303
2	B16	DMSO	0	CD209	28	44	1.05884
2	B16	DMSO	0	CD209	28	45	1.05338
2	B16	DMSO	0	CD209	28	46	1.0954
2	B16	DMSO	0	CD209	28	47	1.06826
2	B16	DMSO	0	CD209	28	48	1.06544
2	B16	DMSO	0	CD209	28	49	1.0628
2	B16	DMSO	0	CD209	28	50	1.06748
2	B16	DMSO	0	CD209	28	51	1.13169
2	B16	DMSO	0	CD209	28	52	1.0761
2	B16	DMSO	0	CD209	28	53	1.05933
2	B16	DMSO	0	CD209	28	54	1.0577
2	B16	DMSO	0	CD209	28	55	1.0629
2	B16	DMSO	0	CD209	28	56	1.06644
2	B16	DMSO	0	CD209	28	57	1.07043
2	B16	DMSO	0	CD209	28	58	1.06327
2	B16	DMSO	0	CD209	28	59	1.11071
2	B16	DMSO	0	CD209	28	60	1.07402
2	B16	DMSO	0	CD209	28	61	1.06933
2	B16	DMSO	0	CD209	28	62	1.0627
2	B16	DMSO	0	CD209	28	63	1.05796
2	B16	DMSO	0	CD209	28	64	1.06439
2	B16	DMSO	0	CD209	28	65	1.0732
2	B16	DMSO	0	CD209	28	66	1.04985
2	B16	DMSO	0	CD209	28	67	1.06192
2	B16	DMSO	0	CD209	28	68	1.06328
2	B16	DMSO	0	CD209	28	69	1.0793
2	B16	DMSO	0	CD209	28	70	1.06264
2	B16	DMSO	0	CD209	28	71	1.05676
2	B16	DMSO	0	CD209	28	72	1.05867
2	B16	DMSO	0	CD209	28	73	1.06124
2	B16	DMSO	0	CD209	28	74	1.05663
2	B16	DMSO	0	CD209	28	75	1.06074
2	B16	DMSO	0	CD209	28	76	1.06705
2	B16	DMSO	0	CD209	28	77	1.05458
2	B16	DMSO	0	CD209	28	78	1.05679
2	B16	DMSO	0	CD209	28	79	1.05789
2	B16	DMSO	0	CD209	28	80	1.06215
2	B16	DMSO	0	CD209	28	81	1.06521
2	B16	DMSO	0	CD209	28	82	1.06964
2	B16	DMSO	0	CD209	28	83	1.06463
2	B16	DMSO	0	CD209	28	84	1.05876
2	B16	DMSO	0	CD209	28	85	1.05624
2	B16	DMSO	0	CD209	28	86	1.05725
2	B16	DMSO	0	CD209	28	87	1.05808
2	B16	DMSO	0	CD209	28	88	1.06741
2	B16	DMSO	0	CD209	28	89	1.05556
2	B16	DMSO	0	CD209	28	90	1.0518
2	B16	DMSO	0	CD209	28	91	1.07222
2	B16	DMSO	0	CD209	28	92	1.06468
2	B16	DMSO	0	CD209	28	93	1.07175
2	B16	DMSO	0	CD209	28	94	1.07082
2	B16	DMSO	0	CD209	28	95	1.05792
2	B16	DMSO	0	CD209	28	96	1.06541
2	B16	DMSO	0	CD209	28	97	1.06669
[truncated: 108,584 more rows]
