# Supplementary material for: Multidimensional pooled shRNA screens in human THP-1 cells identify candidate modulators of macrophage polarization
Source: PLoS One. 2017 Aug 24;12(8):e0183679. doi: 10.1371/journal.pone.0183679 (PMC5570424; doi:10.1371/journal.pone.0183679)
Supplement: S2 Table — (XLSX) [file pone.0183679.s005.xlsx]

## Sheet: Sheet1
RefSeq ID	gene	shRNA ID	phenotypic category	replica	count (normalized to 1 million reads)
NM_033081.2	DIDO1	DIDO1_19372	m1_negative	rep1	0
NM_015382.2	HECTD1	HECTD1_26526	m1_negative	rep1	0
NM_015382.2	HECTD1	HECTD1_26526	m2_positive	rep2	1.09811
NM_004755.2	RPS6KA5	RPS6KA5_23918	m1_negative	rep1	1.2326
NM_031923.2	TAF3	TAF3_14650	m1_negative	rep1	1.2326
NM_006791.3	MORF4L1	MORF4L1_21886	m2_positive	rep2	3.13892
NM_006791.3	MORF4L1	MORF4L1_21886	input	rep2	3.72235
NM_001008541.1	MXI1	MXI1_22004	m1_positive	rep1	3.89226
NM_001130173.1	MYB	MYB_22013	m1_negative	rep1	4.19748
NM_016120.3	RLIM	RLIM_23756	m1_negative	rep1	4.7225
NM_001008541.1	MXI1	MXI1_22004	m2_positive	rep1	4.79518
NM_006791.3	MORF4L1	MORF4L1_21886	m1_positive	rep1	5.36311
NM_015382.2	HECTD1	HECTD1_26526	input	rep2	6.21716
NM_006791.3	MORF4L1	MORF4L1_21886	m1_positive	rep2	6.26531
NM_001130173.1	MYB	MYB_22013	m2_positive	rep1	6.27567
NM_015382.2	HECTD1	HECTD1_26526	m2_negative	rep2	6.30908
NM_015382.2	HECTD1	HECTD1_26526	m1_positive	rep2	6.34816
NM_015382.2	HECTD1	HECTD1_26526	m1_positive	rep1	6.87651
NM_006791.3	MORF4L1	MORF4L1_21886	plasmid	rep1	6.89061
NM_006791.3	MORF4L1	MORF4L1_21886	plasmid	rep2	6.89061
NM_015382.2	HECTD1	HECTD1_26535	input	rep2	7.09211
NM_015382.2	HECTD1	HECTD1_26535	m1_positive	rep1	7.1478
NM_001008541.1	MXI1	MXI1_22004	m1_negative	rep1	7.39562
NM_006892.3	DNMT3B	DNMT3B_19494	m1_negative	rep1	8.23185
NM_006791.3	MORF4L1	MORF4L1_21886	input	rep1	8.40769
NM_006791.3	MORF4L1	MORF4L1_21886	m2_positive	rep1	8.95642
NM_031407.5	HUWE1	HUWE1_26702	m1_negative	rep1	9.14814
NM_015382.2	HECTD1	HECTD1_26535	m1_positive	rep2	9.41656
NM_001130173.1	MYB	MYB_22013	input	rep2	9.55233
NM_015382.2	HECTD1	HECTD1_26526	m2_positive	rep1	10.1786
NM_015382.2	HECTD1	HECTD1_26535	input	rep1	10.5838
NM_006791.3	MORF4L1	MORF4L1_21886	m2_negative	rep2	10.9736
NM_015382.2	HECTD1	HECTD1_26525	input	rep2	11.2211
NM_001130173.1	MYB	MYB_22013	input	rep1	11.3702
NM_015382.2	HECTD1	HECTD1_26526	input	rep1	11.6305
NM_015382.2	HECTD1	HECTD1_26535	m2_negative	rep1	12.274
NM_001130173.1	MYB	MYB_22013	m2_negative	rep2	12.3956
NM_015382.2	HECTD1	HECTD1_26535	m2_positive	rep2	12.4869
NM_006791.3	MORF4L1	MORF4L1_21886	m2_negative	rep1	13.8784
NM_015382.2	HECTD1	HECTD1_26526	plasmid	rep1	15.1702
NM_015382.2	HECTD1	HECTD1_26526	plasmid	rep2	15.1702
NM_015382.2	HECTD1	HECTD1_26535	m2_positive	rep1	15.606
NM_001008541.1	MXI1	MXI1_22004	input	rep2	16.5146
NM_054034.2	FN1	FN1_19782	m1_negative	rep1	16.5235
NM_012074.3	DPF3	DPF3_19558	m1_negative	rep1	16.8025
NM_001080424.1	KDM6B	KDM6B_21350	m1_negative	rep1	17.1009
NM_015382.2	HECTD1	HECTD1_26525	m1_positive	rep1	17.124
NM_001130173.1	MYB	MYB_22013	m1_positive	rep1	17.3816
NM_015382.2	HECTD1	HECTD1_26535	plasmid	rep1	17.6846
NM_015382.2	HECTD1	HECTD1_26535	plasmid	rep2	17.6846
NM_014071.3	NCOA6	NCOA6_22282	m2_positive	rep2	18.2696
NM_001008541.1	MXI1	MXI1_22004	m2_negative	rep2	18.3224
NM_153046.2	TDRD9	TDRD9_15478	m1_negative	rep1	18.9593
NM_054034.2	FN1	FN1_19782	m1_positive	rep1	19.3036
NM_020746.4	MAVS	MAVS_21518	m1_negative	rep1	19.3554
NM_001008541.1	MXI1	MXI1_22004	m2_negative	rep1	19.8592
NM_001130173.1	MYB	MYB_22013	m2_negative	rep1	20.7241
NM_153812.2	PHF13	PHF13_22778	m1_negative	rep1	21.2228
NM_001130173.1	MYB	MYB_22013	m2_positive	rep2	21.427
NM_001130173.1	MYB	MYB_22013	plasmid	rep1	21.487
NM_001130173.1	MYB	MYB_22013	plasmid	rep2	21.487
NM_015382.2	HECTD1	HECTD1_26525	m1_positive	rep2	21.5396
NM_032482.2	DOT1L	DOT1L_19526	m1_negative	rep1	21.9545
NM_054034.2	FN1	FN1_19782	m2_positive	rep1	22.3379
NM_001008541.1	MXI1	MXI1_22004	input	rep1	23.3028
NM_015382.2	HECTD1	HECTD1_26525	m2_positive	rep1	23.3327
NM_033081.2	DIDO1	DIDO1_19374	m1_positive	rep1	23.598
NM_001008541.1	MXI1	MXI1_22004	plasmid	rep1	23.8949
NM_001008541.1	MXI1	MXI1_22004	plasmid	rep2	23.8949
NM_001144965.1	NEDD4L	NEDD4L_14063	m1_negative	rep1	24.2731
NM_033081.2	DIDO1	DIDO1_19372	m2_negative	rep2	24.859
NM_012406.3	PRDM4	PRDM4_23202	m1_negative	rep1	25.2837
NR_037947.1	NSUN2	NSUN2_22506	m1_negative	rep1	25.5329
NM_054034.2	FN1	FN1_19782	m2_negative	rep1	26.0849
NM_004606.3	TAF1	TAF1_25294	m2_positive	rep1	26.2871
NM_054034.2	FN1	FN1_19782	m2_negative	rep2	26.3694
NM_001130173.1	MYB	MYB_22013	m1_positive	rep2	27.5381
NM_001008541.1	MXI1	MXI1_22004	m2_positive	rep2	27.6685
NM_015906.3	TRIM33	TRIM33_15158	m1_negative	rep1	27.7545
NM_015906.3	TRIM33	TRIM33_25868	m1_negative	rep1	28.6806
NM_016120.3	RLIM	RLIM_23756	input	rep1	28.8807
NM_012238.4	SIRT1	SIRT1_24380	m1_negative	rep1	29.1315
NM_033081.2	DIDO1	DIDO1_19374	m2_negative	rep1	29.7081
NM_030665.3	RAI1	RAI1_23550	m1_negative	rep1	30.7317
NM_018699.2	PRDM5	PRDM5_23218	m1_negative	rep1	31.2508
NR_037607.1	UCHL5	UCHL5_25994	m1_negative	rep1	31.3783
NM_003922.3	HERC1	HERC1_26606	m1_negative	rep1	31.5964
NM_030794.2	TDRD3	TDRD3_15662	m2_positive	rep1	31.7573
NM_016111.3	TELO2	TELO2_25546	m2_negative	rep1	31.9408
NM_004755.2	RPS6KA5	RPS6KA5_23918	m2_positive	rep2	32.2951
NM_016120.3	RLIM	RLIM_23756	m2_negative	rep2	32.3067
NM_012238.4	SIRT1	SIRT1_14796	m1_negative	rep1	32.5238
NM_054034.2	FN1	FN1_19782	input	rep2	32.8788
NM_005483.2	CHAF1A	CHAF1A_15678	m1_negative	rep1	33.202
NM_032482.2	DOT1L	DOT1L_19518	m1_negative	rep1	33.2306
NM_014140.3	SMARCAL1	SMARCAL1_15718	m2_positive	rep1	33.6031
NM_016120.3	RLIM	RLIM_23756	input	rep2	33.7526
NM_012241.4	SIRT5	SIRT5_17356	m1_negative	rep1	33.8001
NM_014663.2	KDM4A	KDM4A_21238	m2_positive	rep2	34.2319
NM_015382.2	HECTD1	HECTD1_26526	m2_negative	rep1	34.3654
NM_153812.2	PHF13	PHF13_22778	m1_positive	rep1	34.4158
NM_016111.3	TELO2	TELO2_25546	m1_positive	rep1	34.8198
NM_024947.3	PHC3	PHC3_22714	m1_negative	rep1	34.8796
NM_004755.2	RPS6KA5	RPS6KA5_23918	m2_positive	rep1	34.9244
NM_014663.2	KDM4A	KDM4A_21238	m1_negative	rep1	35.0101
NM_005243.3	EWSR1	EWSR1_19694	m1_negative	rep1	35.4858
NM_015409.4	EP400	EP400_19654	input	rep2	35.5458
NM_016188.4	ACTL6B	ACTL6B_17742	m1_negative	rep1	35.7024
NM_016120.3	RLIM	RLIM_23756	m2_positive	rep1	35.7524
NM_004755.2	RPS6KA5	RPS6KA5_23918	input	rep1	35.9384
NM_016587.3	CBX3	CBX3_17614	m1_positive	rep1	36.1135
NR_040086.1	SETD4	SETD4_24174	input	rep1	36.338
NM_004242.3	HMGN3	HMGN3_20614	m1_negative	rep1	36.3827
NM_001008541.1	MXI1	MXI1_22004	m1_positive	rep2	36.3927
NM_004755.2	RPS6KA5	RPS6KA5_23918	m2_negative	rep2	36.4926
NM_014140.3	SMARCAL1	SMARCAL1_15718	m2_negative	rep2	36.616
NM_015906.3	TRIM33	TRIM33_15158	m1_positive	rep2	36.6977
NM_018263.4	ASXL2	ASXL2_18166	m1_negative	rep1	36.9983
NM_006981.3	NR4A3	NR4A3_14894	m1_negative	rep1	37.1169
NM_018699.2	PRDM5	PRDM5_14540	m1_negative	rep1	37.324
NM_033081.2	DIDO1	DIDO1_19372	m2_positive	rep1	37.8145
NM_014071.3	NCOA6	NCOA6_22282	m2_positive	rep1	37.9069
NM_016120.3	RLIM	RLIM_23756	m1_positive	rep1	38.0423
NM_006892.3	DNMT3B	DNMT3B_19490	m1_positive	rep1	38.1196
NM_015651.1	PHF19	PHF19_22846	m2_negative	rep2	38.2151
NM_015382.2	HECTD1	HECTD1_26535	m1_negative	rep1	38.5848
NM_002524.4	NRAS	NRAS_26346	m1_negative	rep1	38.7292
NM_014671.2	UBE3C	UBE3C_26802	m1_positive	rep1	38.733
NM_003489.3	NRIP1	NRIP1_14918	m1_positive	rep2	39.0619
NM_005967.3	NAB2	NAB2_22206	m1_negative	rep1	39.1506
NM_015382.2	HECTD1	HECTD1_26525	m1_negative	rep1	39.2676
NM_014663.2	KDM4A	KDM4A_21238	m2_negative	rep2	39.4022
NM_182919.3	TICAM1	TICAM1_25702	m1_negative	rep1	39.9358
NM_015906.3	TRIM33	TRIM33_15158	m2_positive	rep1	40.073
NM_001135155.1	DPF1	DPF1_19534	m1_negative	rep1	40.1812
NM_001130688.1	HMGB2	HMGB2_14798	m1_negative	rep1	40.4119
NM_001042424.2	WHSC1	WHSC1_26094	m1_negative	rep1	40.4636
NM_054034.2	FN1	FN1_19782	plasmid	rep1	40.4708
NM_054034.2	FN1	FN1_19782	plasmid	rep2	40.4708
NM_014140.3	SMARCAL1	SMARCAL1_15718	input	rep2	40.6813
NM_054034.2	FN1	FN1_19782	input	rep1	40.7861
NM_005243.3	EWSR1	EWSR1_19694	m1_positive	rep1	40.8007
NM_030794.2	TDRD3	TDRD3_15662	m1_positive	rep1	40.8095
NM_015382.2	HECTD1	HECTD1_26525	m2_positive	rep2	40.8405
NM_001270449.1	UBE3B	UBE3B_26798	m2_positive	rep1	40.9009
NM_033081.2	DIDO1	DIDO1_19374	plasmid	rep1	40.9572
NM_033081.2	DIDO1	DIDO1_19374	plasmid	rep2	40.9572
NM_014140.3	SMARCAL1	SMARCAL1_15718	m1_positive	rep2	41.1084
NM_013393.1	FTSJ2	FTSJ2_19852	m1_negative	rep1	41.3197
NM_005746.2	NAMPT	NAMPT_26285	m2_negative	rep1	41.4189
NM_015906.3	TRIM33	TRIM33_15158	m2_positive	rep2	41.6001
NM_024644.2	C14orf169	C14orf169_18702	m2_negative	rep1	41.68
NM_054034.2	FN1	FN1_19782	m1_positive	rep2	41.7478
NM_005334.2	HCFC1	HCFC1_20078	input	rep2	42.5348
NM_005483.2	CHAF1A	CHAF1A_15678	m1_positive	rep2	42.7373
NM_033081.2	DIDO1	DIDO1_19374	m2_positive	rep2	42.8251
NR_038123.1	PSMA3	PSMA3_23442	m2_positive	rep1	42.8408
NM_017824.4	MARCH5	MARCH5_17678	m1_negative	rep1	43.0619
NM_001144965.1	NEDD4L	NEDD4L_14062	m1_negative	rep1	43.0994
NM_199454.2	PRDM16	PRDM16_23174	m2_positive	rep1	43.12
NM_004606.3	TAF1	TAF1_25294	m1_positive	rep1	43.2488
NM_001135155.1	DPF1	DPF1_19530	m2_negative	rep1	43.4356
NM_199454.2	PRDM16	PRDM16_14942	m1_negative	rep1	43.8276
NM_012406.3	PRDM4	PRDM4_23202	m1_positive	rep2	43.954
NM_021140.2	KDM6A	KDM6A_15790	m1_negative	rep1	43.9808
NM_002024.5	FMR1	FMR1_19766	m1_negative	rep1	44.0551
NM_016120.3	RLIM	RLIM_23756	m2_negative	rep1	44.0563
NR_038123.1	PSMA3	PSMA3_23442	m2_positive	rep2	44.4176
NM_015382.2	HECTD1	HECTD1_26535	m2_negative	rep2	44.4857
NM_001270449.1	UBE3B	UBE3B_26798	m1_negative	rep1	44.6507
NM_153812.2	PHF13	PHF13_22778	m1_positive	rep2	44.7203
NM_020889.2	PHF12	PHF12_22772	m2_positive	rep1	44.7326
NM_016111.3	TELO2	TELO2_25546	input	rep1	44.748
NM_012241.4	SIRT5	SIRT5_17356	m1_positive	rep2	45.0444
NM_003489.3	NRIP1	NRIP1_14918	m2_negative	rep2	45.0713
NM_005762.2	TRIM28	TRIM28_25850	m1_negative	rep1	45.1149
NM_033081.2	DIDO1	DIDO1_19374	m1_positive	rep2	45.2627
NM_015382.2	HECTD1	HECTD1_26525	plasmid	rep1	45.3767
NM_015382.2	HECTD1	HECTD1_26525	plasmid	rep2	45.3767
NM_006509.3	RELB	RELB_23695	m1_positive	rep1	45.8623
NM_020227.2	PRDM9	PRDM9_14662	m1_positive	rep2	46.1224
NM_005243.3	EWSR1	EWSR1_19694	m2_positive	rep1	46.1281
NM_004755.2	RPS6KA5	RPS6KA5_23918	plasmid	rep1	46.1582
NM_004755.2	RPS6KA5	RPS6KA5_23918	plasmid	rep2	46.1582
NM_001184993.1	RNF17	RNF17_23776	m2_positive	rep1	46.7531
NM_015409.4	EP400	EP400_19654	m1_positive	rep1	46.9647
NM_005334.2	HCFC1	HCFC1_20078	m2_negative	rep2	47.0075
NM_004154.3	P2RY6	P2RY6_14478	m1_positive	rep1	47.5209
NR_037947.1	NSUN2	NSUN2_22510	m1_negative	rep1	47.5213
NM_016111.3	TELO2	TELO2_25546	m2_positive	rep1	47.5694
NM_015409.4	EP400	EP400_19654	m2_positive	rep1	47.6456
NM_033081.2	DIDO1	DIDO1_19374	input	rep2	47.6585
NM_015651.1	PHF19	PHF19_22846	m1_positive	rep2	47.8344
NM_152998.2	EZH2	EZH2_26862	m1_negative	rep1	47.9287
NM_030794.2	TDRD3	TDRD3_15662	m2_positive	rep2	47.9769
NM_001042424.2	WHSC1	WHSC1_26094	m1_positive	rep1	48.0325
NM_021078.2	KAT2A	KAT2A_17070	m1_negative	rep1	48.1776
NM_020661.2	AICDA	AICDA_17902	m1_negative	rep1	48.226
NM_015048.1	SETD1B	SETD1B_24134	m2_negative	rep2	48.2454
NM_007144.2	PCGF2	PCGF2_15164	input	rep2	48.401
NM_001270449.1	UBE3B	UBE3B_26798	m1_positive	rep1	48.5171
NM_004755.2	RPS6KA5	RPS6KA5_23918	m1_positive	rep2	48.6325
NM_019606.5	MEPCE	MEPCE_21702	m2_negative	rep2	48.7055
NM_033081.2	DIDO1	DIDO1_19374	input	rep1	48.9512
NM_004606.3	TAF1	TAF1_25294	m1_positive	rep2	49.0089
NM_001042424.2	WHSC1	WHSC1_26094	plasmid	rep1	49.0857
NM_001042424.2	WHSC1	WHSC1_26094	plasmid	rep2	49.0857
NM_014140.3	SMARCAL1	SMARCAL1_15718	m1_positive	rep1	49.1205
NM_181725.3	METTL2A	METTL2A_21758	m1_negative	rep1	49.4797
NM_001270449.1	UBE3B	UBE3B_26798	m2_positive	rep2	49.8101
NM_033081.2	DIDO1	DIDO1_19374	m2_negative	rep2	49.8776
NM_016120.3	RLIM	RLIM_23756	m1_positive	rep2	50.0756
NM_001077261.3	NCOR2	NCOR2_22342	m1_negative	rep1	50.1087
NM_016120.3	RLIM	RLIM_23756	plasmid	rep1	50.2925
NM_016120.3	RLIM	RLIM_23756	plasmid	rep2	50.2925
NM_002051.2	GATA3	GATA3_16966	m2_negative	rep1	50.4176
NM_013351.1	TBX21	TBX21_25340	m1_negative	rep1	50.6662
NM_004242.3	HMGN3	HMGN3_20614	m2_negative	rep1	50.6892
NM_014663.2	KDM4A	KDM4A_21238	m1_positive	rep1	50.6895
NM_003072.3	SMARCA4	SMARCA4_16558	m1_negative	rep1	50.7714
NM_003380.3	VIM	VIM_26046	m1_positive	rep1	50.9983
NM_001527.3	HDAC2	HDAC2_20130	m1_negative	rep1	51.1633
NM_025133.4	FBXO11	FBXO11_19724	m2_positive	rep1	51.2409
NM_005937.3	MLLT6	MLLT6_21874	m1_negative	rep1	51.2907
NM_014109.3	ATAD2	ATAD2_16398	m1_negative	rep1	51.399
NM_001184824.1	PRMT7	PRMT7_23394	m1_negative	rep1	51.4326
NM_152998.2	EZH2	EZH2_26862	m2_positive	rep2	51.5197
NM_001136239.1	PRDM6	PRDM6_23234	m1_positive	rep1	51.697
NM_005652.3	TERF2	TERF2_14222	m2_negative	rep1	51.7279
NM_012237.3	SIRT2	SIRT2_24390	m1_negative	rep1	51.9674
NM_003797.3	EED	EED_19566	m2_positive	rep2	51.989
NM_016111.3	TELO2	TELO2_25546	m2_negative	rep2	52.075
NM_016111.3	TELO2	TELO2_25546	m2_positive	rep2	52.2076
NM_014663.2	KDM4A	KDM4A_21238	plasmid	rep1	52.3722
NM_014663.2	KDM4A	KDM4A_21238	plasmid	rep2	52.3722
NM_001379.2	DNMT1	DNMT1_19466	m1_negative	rep1	52.5717
NM_152293.2	TADA2B	TADA2B_25278	m1_negative	rep1	52.6754
NM_014109.3	ATAD2	ATAD2_18188	m1_negative	rep1	52.9072
NM_177438.2	DICER1	DICER1_26444	m1_negative	rep1	52.9677
NR_049736.1	ASH2L	ASH2L_18124	m1_negative	rep1	53.0271
NM_014663.2	KDM4A	KDM4A_21238	m2_negative	rep1	53.2127
NM_014671.2	UBE3C	UBE3C_26802	m2_positive	rep2	53.3559
NM_014109.3	ATAD2	ATAD2_18190	m2_positive	rep1	53.4882
NM_014671.2	UBE3C	UBE3C_26802	m1_positive	rep2	53.5167
NM_005243.3	EWSR1	EWSR1_19694	m2_positive	rep2	53.6317
NM_003489.3	NRIP1	NRIP1_14918	input	rep2	53.9756
XR_017086.3	Luc	Luc_262002	m1_negative	rep1	54.2622
NM_003298.3	NR2C2	NR2C2_25338	m1_negative	rep1	54.2649
NM_020771.3	HACE1	HACE1_26522	m1_negative	rep1	54.4802
NM_003922.3	HERC1	HERC1_26604	m1_negative	rep1	54.5317
NM_016587.3	CBX3	CBX3_17614	m2_positive	rep2	54.6311
NM_001199155.1	KAT7	KAT7_22150	m1_negative	rep1	54.6368
NM_019852.3	METTL3	METTL3_21774	m1_negative	rep1	54.6676
NM_014140.3	SMARCAL1	SMARCAL1_15718	input	rep1	54.7978
NM_182931.2	MLL5	MLL5_16524	m1_negative	rep1	54.914
NM_015382.2	HECTD1	HECTD1_26525	m2_negative	rep2	54.935
NM_016587.3	CBX3	CBX3_17614	m2_positive	rep1	54.9564
NM_002908.2	REL	REL_15404	m1_negative	rep1	55.0673
NM_006509.3	RELB	RELB_14500	m1_negative	rep1	55.1829
NM_005933.3	MLL	MLL_16846	m2_negative	rep1	55.3023
NM_015382.2	HECTD1	HECTD1_26525	m2_negative	rep1	55.5883
NM_012236.3	SCMH1	SCMH1_24038	m1_negative	rep1	55.7077
NR_040086.1	SETD4	SETD4_24174	input	rep2	55.8401
NR_033717.1	SCML2	SCML2_14874	m2_positive	rep2	56.0234
NM_014140.3	SMARCAL1	SMARCAL1_15718	m2_negative	rep1	56.1851
NM_016587.3	CBX3	CBX3_17614	input	rep1	56.3099
NM_153812.2	PHF13	PHF13_22778	m2_positive	rep1	56.316
NM_001042424.2	WHSC1	WHSC1_26094	m2_negative	rep1	56.3217
NM_004606.3	TAF1	TAF1_25294	m1_negative	rep1	56.4494
NM_003489.3	NRIP1	NRIP1_14918	m1_positive	rep1	56.4662
NM_016120.3	RLIM	RLIM_23756	m2_positive	rep2	56.5797
NM_152998.2	EZH2	EZH2_26862	m1_positive	rep2	56.6022
NM_004426.2	PHC1	PHC1_17639	m1_negative	rep1	56.6508
NM_054034.2	FN1	FN1_19782	m2_positive	rep2	56.6544
NM_003489.3	NRIP1	NRIP1_14918	m2_positive	rep1	56.8386
NM_017824.4	MARCH5	MARCH5_17678	m2_negative	rep2	57.0042
NM_004242.3	HMGN3	HMGN3_20614	m1_positive	rep2	57.0076
NM_005967.3	NAB2	NAB2_22214	m1_positive	rep2	57.036
NM_005933.3	MLL	MLL_16846	m1_positive	rep1	57.0811
NM_005612.4	REST	REST_14518	m2_negative	rep2	57.1483
NM_020889.2	PHF12	PHF12_22772	m2_negative	rep1	57.1734
NM_006186.3	NR4A2	NR4A2_22444	m1_positive	rep1	57.1843
NM_001003652.3	SMAD2	SMAD2_24478	m1_negative	rep1	57.2683
NM_033081.2	DIDO1	DIDO1_19372	m1_positive	rep2	57.2722
NM_015382.2	HECTD1	HECTD1_26525	input	rep1	57.2939
NM_033081.2	DIDO1	DIDO1_19372	input	rep2	57.3148
NM_015048.1	SETD1B	SETD1B_24134	m1_positive	rep1	57.3332
NM_003922.3	HERC1	HERC1_26604	m2_positive	rep1	57.4017
NM_015906.3	TRIM33	TRIM33_15158	m1_positive	rep1	57.529
NM_153812.2	PHF13	PHF13_22778	m2_negative	rep2	57.5905
NM_005933.3	MLL	MLL_16846	m1_positive	rep2	57.6551
NM_016604.3	KDM3B	KDM3B_21220	m2_positive	rep1	57.9927
NM_012241.4	SIRT5	SIRT5_17356	m2_positive	rep2	58.0589
NM_016587.3	CBX3	CBX3_17614	m1_negative	rep1	58.1453
NM_006904.6	PRKDC	PRKDC_26394	m2_positive	rep2	58.2951
NM_003489.3	NRIP1	NRIP1_14918	plasmid	rep1	58.3656
NM_003489.3	NRIP1	NRIP1_14918	plasmid	rep2	58.3656
NM_004242.3	HMGN3	HMGN3_20614	m2_negative	rep2	58.372
NM_001105077.3	MECOM	MECOM_21688	m1_negative	rep1	58.4144
NM_001270449.1	UBE3B	UBE3B_26798	input	rep2	58.5229
NM_006791.3	MORF4L1	MORF4L1_21886	m1_negative	rep1	58.5525
NM_016111.3	TELO2	TELO2_25546	plasmid	rep1	58.5929
NM_016111.3	TELO2	TELO2_25546	plasmid	rep2	58.5929
NM_181725.3	METTL2A	METTL2A_21758	m1_positive	rep1	58.6026
NM_003113.3	SP100	SP100_24974	m1_negative	rep1	58.6718
NM_006186.3	NR4A2	NR4A2_22444	m2_negative	rep2	58.8137
NR_040086.1	SETD4	SETD4_24174	m1_positive	rep1	58.8673
NR_040086.1	SETD4	SETD4_24174	m2_negative	rep2	58.9954
NM_014671.2	UBE3C	UBE3C_26802	m2_positive	rep1	59.0412
NM_015409.4	EP400	EP400_19654	input	rep1	59.0629
NM_001042424.2	WHSC1	WHSC1_26094	input	rep1	59.1057
NM_033081.2	DIDO1	DIDO1_19372	plasmid	rep1	59.3191
NM_033081.2	DIDO1	DIDO1_19372	plasmid	rep2	59.3191
NM_016323.3	HERC5	HERC5_26670	m1_negative	rep1	59.6261
NM_033081.2	DIDO1	DIDO1_19372	m2_positive	rep2	59.6382
NM_033081.2	DIDO1	DIDO1_19374	m1_negative	rep1	59.6781
NM_004412.5	TRDMT1	TRDMT1_25830	m1_positive	rep1	59.6809
NM_012241.4	SIRT5	SIRT5_17356	m1_positive	rep1	59.6909
NM_015651.1	PHF19	PHF19_22846	m1_positive	rep1	59.7224
NM_004217.3	AURKB	AURKB_18286	m2_negative	rep1	59.7591
NM_005483.2	CHAF1A	CHAF1A_15678	m1_positive	rep1	59.7598
NM_003073.3	SMARCB1	SMARCB1_17086	m2_negative	rep2	60.0052
NM_001145260.1	NCOA4	NCOA4_22262	m1_positive	rep1	60.2421
NM_033081.2	DIDO1	DIDO1_19372	m2_negative	rep1	60.4309
NM_175709.3	CBX7	CBX7_18798	m1_negative	rep1	60.4652
NM_004217.3	AURKB	AURKB_18286	m1_positive	rep2	60.9165
NM_001144965.1	NEDD4L	NEDD4L_14062	m2_negative	rep1	60.9176
NM_015651.1	PHF19	PHF19_22846	m2_negative	rep1	60.9899
NM_014140.3	SMARCAL1	SMARCAL1_15718	m2_positive	rep2	61.1207
NM_001001520.1	HDGFRP2	HDGFRP2_20262	m1_positive	rep1	61.1211
NM_003852.3	TRIM24	TRIM24_25834	m2_positive	rep1	61.2359
NM_000937.4	POLR2A	POLR2A_15052	m1_positive	rep2	61.4218
NM_015866.4	PRDM2	PRDM2_23178	m1_positive	rep1	61.4296
NM_015153.2	PHF3	PHF3_14818	m1_negative	rep1	61.5433
NM_014663.2	KDM4A	KDM4A_21238	input	rep2	61.5517
NM_003380.3	VIM	VIM_26046	m1_negative	rep1	61.5653
NR_037947.1	NSUN2	NSUN2_22502	m1_negative	rep1	61.7585
NM_031413.3	CECR2	CECR2_18990	m1_positive	rep1	61.8025
NM_033081.2	DIDO1	DIDO1_19372	input	rep1	61.8183
NM_001003931.2	PARP3	PARP3_22574	m1_positive	rep2	61.8832
NM_001167681.2	FLI1	FLI1_14270	m2_positive	rep2	62.1325
NM_015048.1	SETD1B	SETD1B_24134	m2_positive	rep1	62.1756
NM_019606.5	MEPCE	MEPCE_21702	input	rep1	62.2643
NM_033222.3	PSIP1	PSIP1_17038	m1_positive	rep1	62.2922
NM_177438.2	DICER1	DICER1_26438	m1_positive	rep1	62.4446
NR_040086.1	SETD4	SETD4_24174	m2_positive	rep2	62.4839
NM_001184993.1	RNF17	RNF17_23776	m2_positive	rep2	62.638
NM_004217.3	AURKB	AURKB_18286	m1_positive	rep1	62.7193
NM_014663.2	KDM4A	KDM4A_21238	m2_positive	rep1	62.721
NM_004154.3	P2RY6	P2RY6_14478	m2_negative	rep2	62.7273
NM_001003694.1	BRPF1	BRPF1_18620	m1_negative	rep1	62.8366
NM_024644.2	C14orf169	C14orf169_18702	m1_positive	rep1	62.8776
NM_004217.3	AURKB	AURKB_18286	m2_positive	rep2	62.9031
NM_015906.3	TRIM33	TRIM33_15158	input	rep1	62.9559
NM_015048.1	SETD1B	SETD1B_24134	m2_negative	rep1	63.0485
NM_181725.3	METTL2A	METTL2A_21758	input	rep2	63.1996
NM_001379.2	DNMT1	DNMT1_19462	input	rep2	63.2125
NM_013393.1	FTSJ2	FTSJ2_19846	m2_negative	rep2	63.2152
NM_002051.2	GATA3	GATA3_16966	m2_positive	rep2	63.2177
NM_031407.5	HUWE1	HUWE1_26702	m2_positive	rep2	63.2962
NM_004606.3	TAF1	TAF1_25294	plasmid	rep1	63.3126
NM_004606.3	TAF1	TAF1_25294	plasmid	rep2	63.3126
NR_026590.1	CDYL	CDYL_18916	m1_negative	rep1	63.5527
NM_003489.3	NRIP1	NRIP1_14918	m2_positive	rep2	63.6455
NM_001145357.1	SIN3A	SIN3A_24366	m2_positive	rep2	63.7163
NM_032701.3	SUV420H2	SUV420H2_16006	m1_negative	rep1	63.8559
NM_015048.1	SETD1B	SETD1B_24134	m1_positive	rep2	63.8875
NM_032329.4	ING5	ING5_14950	m2_positive	rep2	63.9454
NM_012238.4	SIRT1	SIRT1_14796	m2_positive	rep1	63.9576
NM_007144.2	PCGF2	PCGF2_15164	m2_positive	rep1	64.0207
NM_001003801.1	SMARCD3	SMARCD3_16372	m1_negative	rep1	64.0573
NM_003079.4	SMARCE1	SMARCE1_24742	m2_positive	rep2	64.1316
NM_020889.2	PHF12	PHF12_22772	input	rep2	64.1538
NM_032482.2	DOT1L	DOT1L_19526	m2_positive	rep1	64.2689
NM_005483.2	CHAF1A	CHAF1A_15678	m2_positive	rep1	64.3936
NM_015409.4	EP400	EP400_19654	m1_positive	rep2	64.4456
NM_007212.3	RNF2	RNF2_15236	m1_negative	rep1	64.4988
NM_016587.3	CBX3	CBX3_17614	m2_negative	rep2	64.5182
NM_033081.2	DIDO1	DIDO1_19372	m1_positive	rep1	64.6271
NM_001270449.1	UBE3B	UBE3B_26798	m2_negative	rep2	64.7418
NM_014140.3	SMARCAL1	SMARCAL1_15718	plasmid	rep1	64.7455
NM_014140.3	SMARCAL1	SMARCAL1_15718	plasmid	rep2	64.7455
NM_014663.2	KDM4A	KDM4A_21238	input	rep1	64.7461
NM_024644.2	C14orf169	C14orf169_18702	m2_negative	rep2	64.8883
NM_015050.2	FTSJD2	FTSJD2_19874	m1_negative	rep1	65.1015
NM_003601.3	SMARCA5	SMARCA5_24620	m1_negative	rep1	65.1846
NM_001006944.1	RPS6KA4	RPS6KA4_16174	m2_negative	rep2	65.2002
NM_003086.2	SNAPC4	SNAPC4_24906	m1_negative	rep1	65.2258
NM_001379.2	DNMT1	DNMT1_19462	m2_negative	rep1	65.4406
NM_017824.4	MARCH5	MARCH5_17674	m1_positive	rep1	65.6003
NM_030632.1	ASXL3	ASXL3_18186	m2_negative	rep2	65.7186
NM_001991.3	EZH1	EZH1_19710	m1_negative	rep1	65.7453
NM_022874.2	SMN1	SMN1_24748	m1_positive	rep2	65.7641
NM_032482.2	DOT1L	DOT1L_19518	m2_negative	rep1	65.781
NM_014663.2	KDM4A	KDM4A_21238	m1_positive	rep2	65.822
NM_001042424.2	WHSC1	WHSC1_26094	m2_positive	rep2	65.8454
NM_015409.4	EP400	EP400_19654	plasmid	rep1	65.9394
NM_015409.4	EP400	EP400_19654	plasmid	rep2	65.9394
NM_015559.2	SETBP1	SETBP1_24110	m1_negative	rep1	65.9568
NM_015906.3	TRIM33	TRIM33_15158	plasmid	rep1	66.0001
NM_015906.3	TRIM33	TRIM33_15158	plasmid	rep2	66.0001
NM_014390.2	SND1	SND1_15458	m2_positive	rep1	66.0007
NM_024644.2	C14orf169	C14orf169_18702	m2_positive	rep1	66.0384
NM_024644.2	C14orf169	C14orf169_18702	m2_positive	rep2	66.1041
NM_000937.4	POLR2A	POLR2A_15052	m1_positive	rep1	66.1071
NM_001144965.1	NEDD4L	NEDD4L_14062	m2_positive	rep2	66.1371
NM_001042424.2	WHSC1	WHSC1_26094	m1_positive	rep2	66.146
NM_015052.3	HECW1	HECW1_26574	m1_negative	rep1	66.1676
NM_019606.5	MEPCE	MEPCE_21702	m2_positive	rep1	66.1954
NM_015906.3	TRIM33	TRIM33_15158	m2_negative	rep2	66.3374
NM_001328.2	CTBP1	CTBP1_14466	m1_positive	rep2	66.3379
NM_001270.2	CHD1	CHD1_15055	m1_negative	rep1	66.3905
NM_005933.3	MLL	MLL_16846	m2_positive	rep1	66.4607
NM_003922.3	HERC1	HERC1_26604	m2_negative	rep1	66.4916
NM_033081.2	DIDO1	DIDO1_19374	m2_positive	rep1	66.4939
NM_020327.3	ACVR1B	ACVR1B_17806	m1_negative	rep1	66.5223
NM_153812.2	PHF13	PHF13_22778	input	rep2	66.5406
NM_004755.2	RPS6KA5	RPS6KA5_23918	m1_positive	rep1	66.5695
NM_015050.2	FTSJD2	FTSJD2_19874	m1_positive	rep2	66.7339
NM_001379.2	DNMT1	DNMT1_19462	m1_positive	rep1	66.7879
NM_016111.3	TELO2	TELO2_25546	m1_positive	rep2	66.7972
NM_001199155.1	KAT7	KAT7_22150	m2_positive	rep2	66.7987
NM_014071.3	NCOA6	NCOA6_22282	m2_negative	rep2	66.879
NM_030625.2	TET1	TET1_25606	m2_negative	rep1	66.9045
NM_001145357.1	SIN3A	SIN3A_24366	m1_negative	rep1	67.015
NM_005967.3	NAB2	NAB2_22214	m1_negative	rep1	67.0153
NM_139135.2	ARID1A	ARID1A_17950	m1_negative	rep1	67.0454
NM_001256536.1	PRMT8	PRMT8_23406	m2_positive	rep1	67.068
NM_018975.3	TERF2IP	TERF2IP_25580	m1_positive	rep1	67.1203
NM_001127217.2	SMAD9	SMAD9_24574	m1_negative	rep1	67.1349
NM_153812.2	PHF13	PHF13_22778	input	rep1	67.1834
NM_015409.4	EP400	EP400_19654	m1_negative	rep1	67.1922
NM_004667.5	HERC2	HERC2_26622	m1_negative	rep1	67.2317
NM_012240.2	SIRT4	SIRT4_14780	m1_negative	rep1	67.4266
NM_170723.1	CDY1	CDY1_17628	m1_negative	rep1	67.4803
NM_030794.2	TDRD3	TDRD3_15662	m1_positive	rep2	67.5927
NM_198795.1	TDRD1	TDRD1_25422	m1_negative	rep1	67.6754
NM_006904.6	PRKDC	PRKDC_26394	m1_positive	rep1	67.7603
NM_004426.2	PHC1	PHC1_17646	m1_positive	rep1	67.7937
NM_004755.2	RPS6KA5	RPS6KA5_23918	m2_negative	rep1	67.8975
NM_030632.1	ASXL3	ASXL3_18186	m2_positive	rep1	68.0718
NM_017824.4	MARCH5	MARCH5_17678	m2_negative	rep1	68.1142
NM_014071.3	NCOA6	NCOA6_22282	m1_negative	rep1	68.1209
NM_001003931.2	PARP3	PARP3_22574	input	rep1	68.1657
NM_024947.3	PHC3	PHC3_22716	m1_positive	rep2	68.1736
NM_004606.3	TAF1	TAF1_25294	input	rep1	68.2775
NM_002524.4	NRAS	NRAS_26350	m2_negative	rep1	68.301
NM_016578.3	RSF1	RSF1_15942	input	rep1	68.3116
NM_012074.3	DPF3	DPF3_19558	m1_positive	rep1	68.3171
NM_004217.3	AURKB	AURKB_18286	m2_positive	rep1	68.3485
NM_012074.3	DPF3	DPF3_19558	m2_negative	rep2	68.3743
NM_001127217.2	SMAD9	SMAD9_24574	m2_positive	rep1	68.4664
NM_001270449.1	UBE3B	UBE3B_26798	m1_positive	rep2	68.5272
NM_012406.3	PRDM4	PRDM4_23202	m2_negative	rep2	68.5793
NM_018263.4	ASXL2	ASXL2_18170	m1_positive	rep1	68.6224
NM_015052.3	HECW1	HECW1_26574	input	rep2	68.7536
NM_030794.2	TDRD3	TDRD3_15662	m2_negative	rep2	68.7756
NM_001184993.1	RNF17	RNF17_23776	m1_positive	rep2	68.8267
NM_001328.2	CTBP1	CTBP1_14466	m1_negative	rep1	68.8411
NM_002908.2	REL	REL_15404	m1_positive	rep2	69.1465
NM_014314.3	DDX58	DDX58_16522	m1_positive	rep2	69.1525
NM_014140.3	SMARCAL1	SMARCAL1_15718	m1_negative	rep1	69.2687
NM_003073.3	SMARCB1	SMARCB1_17086	m2_positive	rep1	69.2738
NM_001198719.1	RBBP7	RBBP7_23602	m1_positive	rep2	69.3496
NM_030632.1	ASXL3	ASXL3_18186	m2_negative	rep1	69.4689
NM_001144965.1	NEDD4L	NEDD4L_14062	m1_positive	rep1	69.5499
NM_014671.2	UBE3C	UBE3C_26802	m1_negative	rep1	69.6077
NM_012238.4	SIRT1	SIRT1_14796	m2_positive	rep2	69.7093
NM_001256536.1	PRMT8	PRMT8_23406	m1_positive	rep1	69.788
NM_001042533.2	MINA	MINA_21786	m2_positive	rep1	69.872
NM_138609.2	H2AFY	H2AFY_20012	m2_positive	rep2	69.9255
NM_020901.2	PHRF1	PHRF1_17348	m2_positive	rep1	69.9297
NM_014671.2	UBE3C	UBE3C_26802	m2_negative	rep2	69.947
NM_000489.3	ATRX	ATRX_18270	m1_positive	rep1	69.9516
NM_001003931.2	PARP3	PARP3_22574	m2_positive	rep2	69.9644
NM_005224.2	ARID3A	ARID3A_16830	m1_negative	rep1	70.0781
NM_177438.2	DICER1	DICER1_26438	m2_positive	rep2	70.0921
NM_001273.2	CHD4	CHD4_19110	m2_positive	rep1	70.1866
NM_005693.3	NR1H3	NR1H3_22414	m1_negative	rep1	70.2019
NM_015052.3	HECW1	HECW1_17518	m2_negative	rep2	70.3169
NM_003146.2	SSRP1	SSRP1_25078	m2_positive	rep2	70.3242
NM_022899.4	ACTR8	ACTR8_17789	m1_negative	rep1	70.3245
NM_005746.2	NAMPT	NAMPT_26285	m2_positive	rep2	70.3502
NM_015651.1	PHF19	PHF19_22846	input	rep1	70.394
NM_177438.2	DICER1	DICER1_26438	m2_positive	rep1	70.4056
NM_021620.3	PRDM13	PRDM13_14732	m1_negative	rep1	70.4369
NM_003489.3	NRIP1	NRIP1_14918	input	rep1	70.4834
NM_015409.4	EP400	EP400_19654	m2_positive	rep2	70.5199
NM_006509.3	RELB	RELB_23695	m1_negative	rep1	70.5851
NM_001135155.1	DPF1	DPF1_19530	m1_positive	rep2	70.6047
NM_024947.3	PHC3	PHC3_22714	m1_positive	rep2	70.6472
NM_001244580.1	TRRAP	TRRAP_25898	m1_negative	rep1	70.649
NM_014290.2	TDRD7	TDRD7_25502	m1_negative	rep1	70.7093
NM_013369.3	DNMT3L	DNMT3L_19502	m2_negative	rep1	70.7567
NM_002051.2	GATA3	GATA3_16966	input	rep1	70.757
NM_054034.2	FN1	FN1_19788	m1_negative	rep1	70.7618
NM_015906.3	TRIM33	TRIM33_15158	m2_negative	rep1	70.7636
NM_000660.4	TGFB1	TGFB1_14126	m1_negative	rep1	70.8887
NM_032199.2	ARID5B	ARID5B_18078	m1_positive	rep1	70.8953
NM_001003694.1	BRPF1	BRPF1_18630	m1_negative	rep1	70.9859
NM_003146.2	SSRP1	SSRP1_25076	m2_positive	rep1	70.9979
NM_030665.3	RAI1	RAI1_23550	m2_positive	rep1	71.0515
NM_031407.5	HUWE1	HUWE1_26702	m2_positive	rep1	71.1482
NM_001184993.1	RNF17	RNF17_23776	input	rep2	71.1829
NM_032569.3	GLYR1	GLYR1_19948	m1_positive	rep1	71.2963
NR_033717.1	SCML2	SCML2_14874	m1_positive	rep2	71.3401
NM_020889.2	PHF12	PHF12_22772	m2_positive	rep2	71.4451
NM_015651.1	PHF19	PHF19_22846	m2_positive	rep1	71.5346
NR_037947.1	NSUN2	NSUN2_22502	m1_positive	rep1	71.6717
NM_015651.1	PHF19	PHF19_22846	m1_negative	rep1	71.7091
NM_001003931.2	PARP3	PARP3_22574	m2_negative	rep2	71.747
NM_004154.3	P2RY6	P2RY6_14478	m1_positive	rep2	71.7487
NM_001135155.1	DPF1	DPF1_19534	m2_positive	rep2	71.8704
NM_138609.2	H2AFY	H2AFY_20012	m2_positive	rep1	71.9564
NM_003601.3	SMARCA5	SMARCA5_24626	m2_positive	rep2	71.9727
NM_004606.3	TAF1	TAF1_25294	m2_positive	rep2	71.9916
NM_012237.3	SIRT2	SIRT2_24382	m1_negative	rep1	72.0567
NM_015052.3	HECW1	HECW1_17518	m2_negative	rep1	72.1367
NM_003079.4	SMARCE1	SMARCE1_24742	m1_positive	rep2	72.1926
NM_004755.2	RPS6KA5	RPS6KA5_14082	m1_negative	rep1	72.2528
NM_001144965.1	NEDD4L	NEDD4L_14062	m2_positive	rep1	72.4772
NR_038123.1	PSMA3	PSMA3_23442	m1_positive	rep2	72.5508
NM_001042424.2	WHSC1	WHSC1_26094	input	rep2	72.5882
NM_030648.2	SETD7	SETD7_15710	m1_negative	rep1	72.7713
NM_004825.2	CDY2A	CDY2A_18910	m2_positive	rep1	72.9324
NM_001079526.1	IKZF2	IKZF2_20734	m1_negative	rep1	72.9329
NM_006892.3	DNMT3B	DNMT3B_19490	m2_positive	rep1	72.9426
NM_005243.3	EWSR1	EWSR1_19698	m2_positive	rep1	73.0889
NM_006981.3	NR4A3	NR4A3_14894	m2_negative	rep1	73.2875
NM_004242.3	HMGN3	HMGN3_20614	input	rep2	73.4878
NM_001242902.1	AKAP1	AKAP1_17922	m2_negative	rep2	73.5278
NM_030625.2	TET1	TET1_25604	m1_negative	rep1	73.557
NR_037947.1	NSUN2	NSUN2_22502	m2_positive	rep1	73.6209
NM_173464.3	L3MBTL4	L3MBTL4_21450	m1_positive	rep1	73.7248
NM_152998.2	EZH2	EZH2_26862	m2_positive	rep1	73.7443
NM_004217.3	AURKB	AURKB_18286	m2_negative	rep2	73.7666
NM_019606.5	MEPCE	MEPCE_21702	m1_negative	rep1	73.7865
NM_015409.4	EP400	EP400_19654	m2_negative	rep1	73.8421
NM_004426.2	PHC1	PHC1_17646	m1_positive	rep2	73.911
NM_001003931.2	PARP3	PARP3_22574	plasmid	rep1	73.9626
NM_001003931.2	PARP3	PARP3_22574	plasmid	rep2	73.9626
NM_016587.3	CBX3	CBX3_15138	m1_negative	rep1	73.9795
NM_014390.2	SND1	SND1_15458	m1_positive	rep1	74.0727
NM_153812.2	PHF13	PHF13_22778	plasmid	rep1	74.1516
NM_153812.2	PHF13	PHF13_22778	plasmid	rep2	74.1516
NM_001085487.2	MYSM1	MYSM1_16718	m2_negative	rep2	74.1629
NM_024947.3	PHC3	PHC3_22716	m1_negative	rep1	74.3885
NM_001145260.1	NCOA4	NCOA4_22262	m1_positive	rep2	74.4324
NM_153042.3	KDM1B	KDM1B_21186	input	rep2	74.4774
NM_006339.2	HMG20B	HMG20B_14566	m2_negative	rep2	74.4915
NM_019606.5	MEPCE	MEPCE_21702	plasmid	rep1	74.4939
NM_019606.5	MEPCE	MEPCE_21702	plasmid	rep2	74.4939
NM_020889.2	PHF12	PHF12_22772	input	rep1	74.5624
NM_007144.2	PCGF2	PCGF2_15164	input	rep1	74.6027
NM_003799.1	RNMT	RNMT_23846	m1_negative	rep1	74.6286
NM_005788.3	PRMT3	PRMT3_23348	plasmid	rep1	74.6397
NM_005788.3	PRMT3	PRMT3_23348	plasmid	rep2	74.6397
NM_016578.3	RSF1	RSF1_15942	m1_positive	rep2	74.6518
NM_018196.3	TMLHE	TMLHE_25718	m1_negative	rep1	74.6685
NM_005243.3	EWSR1	EWSR1_19694	m2_negative	rep1	74.6817
NM_006037.3	HDAC4	HDAC4_20158	m2_negative	rep1	74.7431
NM_024831.6	TGS1	TGS1_15590	input	rep1	74.8533
NM_005392.3	PHF2	PHF2_22862	m1_positive	rep1	74.8747
NM_001130688.1	HMGB2	HMGB2_20524	m1_negative	rep1	74.9368
NM_004606.3	TAF1	TAF1_25294	input	rep2	74.9974
NM_019592.5	RNF20	RNF20_23790	m2_positive	rep1	75.0574
NM_024644.2	C14orf169	C14orf169_18702	plasmid	rep1	75.0695
NM_024644.2	C14orf169	C14orf169_18702	plasmid	rep2	75.0695
NR_033717.1	SCML2	SCML2_14874	m1_negative	rep1	75.1436
NM_012406.3	PRDM4	PRDM4_23202	input	rep1	75.1878
NM_005903.5	SMAD5	SMAD5_24522	m2_negative	rep1	75.1996
NM_012406.3	PRDM4	PRDM4_23202	m2_negative	rep1	75.3399
NM_003601.3	SMARCA5	SMARCA5_24621	m2_positive	rep2	75.4253
NM_032569.3	GLYR1	GLYR1_19948	m1_negative	rep1	75.6151
NM_181725.3	METTL2A	METTL2A_21758	m1_positive	rep2	75.6508
NM_001003931.2	PARP3	PARP3_22574	m1_positive	rep1	75.7177
NM_001127217.2	SMAD9	SMAD9_24574	m2_negative	rep1	75.7363
NM_031407.5	HUWE1	HUWE1_26702	plasmid	rep1	75.7613
NM_031407.5	HUWE1	HUWE1_26702	plasmid	rep2	75.7613
NR_040086.1	SETD4	SETD4_24174	plasmid	rep1	75.8713
NR_040086.1	SETD4	SETD4_24174	plasmid	rep2	75.8713
NM_006186.3	NR4A2	NR4A2_22444	m1_positive	rep2	75.9072
NM_007371.3	BRD3	BRD3_18510	m2_positive	rep1	75.9311
NM_015651.1	PHF19	PHF19_22846	input	rep2	76.0042
NM_012074.3	DPF3	DPF3_19558	input	rep2	76.0235
NM_153046.2	TDRD9	TDRD9_25514	m1_positive	rep1	76.1304
NR_040086.1	SETD4	SETD4_24174	m1_negative	rep1	76.1724
NM_001184993.1	RNF17	RNF17_23776	m1_positive	rep1	76.211
NM_016587.3	CBX3	CBX3_17614	plasmid	rep1	76.2231
NM_016587.3	CBX3	CBX3_17614	plasmid	rep2	76.2231
NM_003068.4	SNAI2	SNAI2_24894	m1_negative	rep1	76.3752
NM_032329.4	ING5	ING5_14950	m2_negative	rep2	76.3786
NM_012074.3	DPF3	DPF3_19558	m1_positive	rep2	76.4229
NM_015409.4	EP400	EP400_17570	input	rep1	76.5777
NM_003927.4	MBD2	MBD2_21554	m1_positive	rep1	76.5843
NM_000314.4	PTEN	PTEN_23450	m2_positive	rep2	76.6092
NM_014071.3	NCOA6	NCOA6_22282	m1_positive	rep1	76.841
NM_012241.4	SIRT5	SIRT5_17356	m2_positive	rep1	76.8858
NM_001010870.2	TDRD6	TDRD6_25498	m1_negative	rep1	76.9122
NM_004755.2	RPS6KA5	RPS6KA5_23918	input	rep2	77.0119
NM_001144965.1	NEDD4L	NEDD4L_14062	input	rep2	77.1087
NM_014671.2	UBE3C	UBE3C_26802	input	rep2	77.175
NM_006037.3	HDAC4	HDAC4_20158	m2_positive	rep2	77.2648
NM_024947.3	PHC3	PHC3_22716	plasmid	rep1	77.3442
NM_024947.3	PHC3	PHC3_22716	plasmid	rep2	77.3442
NM_017824.4	MARCH5	MARCH5_17674	m2_negative	rep1	77.4524
NM_003298.3	NR2C2	NR2C2_25330	m1_positive	rep2	77.5049
NM_182641.3	BPTF	BPTF_14666	m2_positive	rep1	77.6897
NM_012241.4	SIRT5	SIRT5_17356	input	rep1	77.7064
NM_001005271.2	CHD3	CHD3_19094	input	rep2	77.7289
NM_004412.5	TRDMT1	TRDMT1_25830	m1_positive	rep2	77.8139
NM_002931.3	RING1	RING1_23714	m2_positive	rep1	77.8736
NM_015866.4	PRDM2	PRDM2_23178	m2_positive	rep1	78.0055
NM_001203.2	BMPR1B	BMPR1B_18438	m1_negative	rep1	78.0561
NM_017635.3	SUV420H1	SUV420H1_25222	input	rep1	78.1318
NM_005392.3	PHF2	PHF2_22862	m2_positive	rep1	78.163
NM_000660.4	TGFB1	TGFB1_25676	m1_negative	rep1	78.1709
NM_003380.3	VIM	VIM_26046	m2_positive	rep1	78.1781
NM_170723.1	CDY1	CDY1_17628	m2_positive	rep2	78.1794
NM_015048.1	SETD1B	SETD1B_24134	m1_negative	rep1	78.2127
NR_037947.1	NSUN2	NSUN2_22508	m1_negative	rep1	78.2323
NM_021078.2	KAT2A	KAT2A_17070	m1_positive	rep1	78.2665
NM_001792.3	CDH2	CDH2_17470	m1_negative	rep1	78.2946
NM_001203258.1	MTA1	MTA1_14430	m1_positive	rep1	78.3151
NM_014663.2	KDM4A	KDM4A_21230	m2_negative	rep1	78.3644
NM_020395.3	INTS12	INTS12_20902	m1_positive	rep1	78.367
NM_033222.3	PSIP1	PSIP1_17038	m1_positive	rep2	78.3912
NM_031407.5	HUWE1	HUWE1_15666	m1_negative	rep1	78.5053
NM_175709.3	CBX7	CBX7_18798	m2_positive	rep2	78.5226
NM_016578.3	RSF1	RSF1_15942	input	rep2	78.6196
NM_004187.3	KDM5C	KDM5C_21302	m1_negative	rep1	78.6395
NM_032569.3	GLYR1	GLYR1_19948	m2_negative	rep1	78.6548
NM_024610.5	HSPBAP1	HSPBAP1_20661	m2_positive	rep2	78.7081
NM_003380.3	VIM	VIM_26046	m2_positive	rep2	78.9562
NM_032482.2	DOT1L	DOT1L_19518	m2_negative	rep2	78.959
NM_020889.2	PHF12	PHF12_22772	plasmid	rep1	79.0326
NM_020889.2	PHF12	PHF12_22772	plasmid	rep2	79.0326
NM_005746.2	NAMPT	NAMPT_26285	plasmid	rep1	79.0847
NM_005746.2	NAMPT	NAMPT_26285	plasmid	rep2	79.0847
NM_020395.3	INTS12	INTS12_20902	m2_positive	rep1	79.0883
NM_001042424.2	WHSC1	WHSC1_26094	m2_positive	rep1	79.0884
NM_001003931.2	PARP3	PARP3_22574	m1_negative	rep1	79.111
NM_013393.1	FTSJ2	FTSJ2_19846	m2_negative	rep1	79.126
NM_007144.2	PCGF2	PCGF2_15164	m2_negative	rep2	79.1298
NM_004217.3	AURKB	AURKB_18286	input	rep2	79.1481
NM_012117.2	CBX5	CBX5_18762	m1_negative	rep1	79.4825
NR_024549.1	DMTF1	DMTF1_19422	m1_positive	rep1	79.5469
NM_001145260.1	NCOA4	NCOA4_22262	m2_negative	rep1	79.6162
NM_003797.3	EED	EED_19566	m1_positive	rep2	79.6959
NM_000536.3	RAG2	RAG2_23538	m1_negative	rep1	79.7774
NM_003482.3	MLL2	MLL2_21810	m1_negative	rep1	79.8312
NM_001001520.1	HDGFRP2	HDGFRP2_20262	m2_positive	rep1	79.8462
NM_004301.3	ACTL6A	ACTL6A_17714	m2_positive	rep1	79.8651
NM_003812.2	ADAM23	ADAM23_17852	m1_positive	rep1	79.8796
NM_001144965.1	NEDD4L	NEDD4L_14062	m1_positive	rep2	79.9289
NM_032482.2	DOT1L	DOT1L_19526	input	rep2	79.9876
NR_033435.1	PHF14	PHF14_22796	m1_negative	rep1	80.0723
NM_005057.3	RBBP5	RBBP5_23586	input	rep2	80.1208
NM_005483.2	CHAF1A	CHAF1A_15678	m2_negative	rep1	80.2343
NM_001379.2	DNMT1	DNMT1_19462	m2_positive	rep2	80.2485
NM_001006944.1	RPS6KA4	RPS6KA4_16174	input	rep1	80.2534
NM_004667.5	HERC2	HERC2_26622	m2_negative	rep1	80.2875
NM_007144.2	PCGF2	PCGF2_15164	m1_negative	rep1	80.3289
NM_015906.3	TRIM33	TRIM33_25868	m2_negative	rep1	80.3418
NM_001042533.2	MINA	MINA_15834	m2_positive	rep1	80.3941
NM_177438.2	DICER1	DICER1_26444	m1_positive	rep1	80.4599
NM_003073.3	SMARCB1	SMARCB1_17086	m2_negative	rep1	80.4831
NM_004494.2	HDGF	HDGF_20238	m2_positive	rep1	80.5126
NM_001003931.2	PARP3	PARP3_22574	input	rep2	80.5318
NM_003927.4	MBD2	MBD2_21554	m1_positive	rep2	80.5597
NM_001256536.1	PRMT8	PRMT8_23406	m2_negative	rep1	80.6117
NM_004755.2	RPS6KA5	RPS6KA5_14082	m2_negative	rep2	80.6883
NM_138609.2	H2AFY	H2AFY_20012	m1_negative	rep1	80.6955
NM_004154.3	P2RY6	P2RY6_14478	input	rep2	80.7124
NM_012240.2	SIRT4	SIRT4_14780	m2_negative	rep1	80.7748
NM_001273.2	CHD4	CHD4_19110	m2_negative	rep2	80.8161
NM_005392.3	PHF2	PHF2_22862	input	rep1	80.8585
NM_001135155.1	DPF1	DPF1_19534	m2_negative	rep2	80.8634
NM_015651.1	PHF19	PHF19_22846	plasmid	rep1	80.8666
NM_015651.1	PHF19	PHF19_22846	plasmid	rep2	80.8666
NM_001042533.2	MINA	MINA_21786	m2_positive	rep2	80.9907
NM_005788.3	PRMT3	PRMT3_23348	m2_positive	rep2	81.0521
NM_182919.3	TICAM1	TICAM1_25702	m2_negative	rep1	81.0522
NM_022491.2	SUDS3	SUDS3_16630	m2_positive	rep1	81.0573
NM_001786.4	CDK1	CDK1_26310	m1_negative	rep1	81.1615
NM_020889.2	PHF12	PHF12_22772	m1_negative	rep1	81.1728
NM_015052.3	HECW1	HECW1_26574	m2_negative	rep1	81.1912
NM_177438.2	DICER1	DICER1_26438	m1_positive	rep2	81.2503
NM_001242902.1	AKAP1	AKAP1_17934	m2_negative	rep2	81.2925
NM_024644.2	C14orf169	C14orf169_18702	m1_positive	rep2	81.3219
NM_054034.2	FN1	FN1_19790	m1_positive	rep1	81.3311
NM_182641.3	BPTF	BPTF_18470	input	rep2	81.3638
NM_001270.2	CHD1	CHD1_19068	m1_negative	rep1	81.3949
NM_054034.2	FN1	FN1_19788	m1_positive	rep1	81.4069
NM_001270449.1	UBE3B	UBE3B_26798	input	rep1	81.442
NM_017984.4	ZCWPW1	ZCWPW1_26174	m2_negative	rep1	81.5025
NM_004606.3	TAF1	TAF1_25294	m2_negative	rep2	81.6162
NM_001029880.2	SFMBT2	SFMBT2_24312	m1_negative	rep1	81.6299
NM_001273.2	CHD4	CHD4_19110	m1_negative	rep1	81.6385
NM_032482.2	DOT1L	DOT1L_16686	m2_positive	rep1	81.6803
NM_001003694.1	BRPF1	BRPF1_18622	m1_negative	rep1	81.7223
NM_006186.3	NR4A2	NR4A2_22444	m2_negative	rep1	81.7592
NM_153812.2	PHF13	PHF13_22778	m2_negative	rep1	81.7662
NM_002051.2	GATA3	GATA3_16966	plasmid	rep1	81.8089
NM_002051.2	GATA3	GATA3_16966	plasmid	rep2	81.8089
NM_006981.3	NR4A3	NR4A3_14894	input	rep1	81.8708
NM_006530.2	YEATS4	YEATS4_26156	m2_negative	rep2	81.8714
NM_002165.3	ID1	ID1_20686	m2_negative	rep2	81.8839
NM_199454.2	PRDM16	PRDM16_23174	m2_negative	rep2	81.8956
NM_152998.2	EZH2	EZH2_26874	m2_positive	rep1	81.9077
NM_015048.1	SETD1B	SETD1B_24134	plasmid	rep1	82.0162
NM_015048.1	SETD1B	SETD1B_24134	plasmid	rep2	82.0162
NM_017984.4	ZCWPW1	ZCWPW1_26174	m1_positive	rep1	82.117
NM_001203.2	BMPR1B	BMPR1B_18442	m1_positive	rep1	82.1344
NM_024947.3	PHC3	PHC3_22714	m1_positive	rep1	82.15
NM_032329.4	ING5	ING5_14950	m2_positive	rep1	82.1849
NM_025134.4	CHD9	CHD9_19186	m2_negative	rep1	82.2201
NM_001379.2	DNMT1	DNMT1_19462	m2_negative	rep2	82.2698
NM_007144.2	PCGF2	PCGF2_15164	m1_positive	rep2	82.3242
NM_005903.5	SMAD5	SMAD5_24518	m1_negative	rep1	82.3467
NM_177438.2	DICER1	DICER1_26444	m1_positive	rep2	82.3806
NM_001199155.1	KAT7	KAT7_22150	m2_negative	rep2	82.3966
NM_173464.3	L3MBTL4	L3MBTL4_21452	m1_negative	rep1	82.3974
NM_003482.3	MLL2	MLL2_21802	m1_positive	rep1	82.4092
NR_037947.1	NSUN2	NSUN2_22510	m2_negative	rep1	82.4334
NM_006904.6	PRKDC	PRKDC_26394	m2_positive	rep1	82.4896
NM_005483.2	CHAF1A	CHAF1A_15678	m2_positive	rep2	82.4958
NM_021975.3	RELA	RELA_14498	m1_positive	rep1	82.5779
NM_014390.2	SND1	SND1_15458	input	rep1	82.5917
NM_019606.5	MEPCE	MEPCE_21702	m1_positive	rep1	82.6248
NM_014071.3	NCOA6	NCOA6_22282	m1_positive	rep2	82.6618
NM_001178055.1	PARP8	PARP8_15526	m1_negative	rep1	82.662
NM_139135.2	ARID1A	ARID1A_17956	m1_positive	rep1	82.7412
NM_002051.2	GATA3	GATA3_16966	m2_positive	rep1	82.7551
NM_032482.2	DOT1L	DOT1L_19518	m2_positive	rep2	82.8096
NM_032482.2	DOT1L	DOT1L_19526	m1_positive	rep1	82.8911
NM_021620.3	PRDM13	PRDM13_14732	m2_positive	rep1	82.965
NM_014314.3	DDX58	DDX58_16522	m2_positive	rep1	82.9745
NM_004329.2	BMPR1A	BMPR1A_18422	m2_negative	rep1	82.9782
NM_139266.2	STAT1	STAT1_25098	m2_positive	rep2	82.9906
NM_006509.3	RELB	RELB_23695	m2_positive	rep1	83.1708
NM_015651.1	PHF19	PHF19_22858	m2_positive	rep1	83.1831
NM_022491.2	SUDS3	SUDS3_16630	m2_positive	rep2	83.2958
NM_024644.2	C14orf169	C14orf169_18702	input	rep2	83.3495
NM_152896.2	UHRF2	UHRF2_26014	m1_negative	rep1	83.4003
NM_001200.2	BMP2	BMP2_18402	m2_positive	rep1	83.425
NM_015906.3	TRIM33	TRIM33_25866	m2_positive	rep1	83.5079
NM_004606.3	TAF1	TAF1_25294	m2_negative	rep1	83.56
NM_153809.2	TAF1L	TAF1L_16260	m2_positive	rep2	83.5626
NM_001198.3	PRDM1	PRDM1_23070	m1_positive	rep1	83.5642
NM_021140.2	KDM6A	KDM6A_21324	m2_positive	rep1	83.5874
NM_001242902.1	AKAP1	AKAP1_17934	m1_positive	rep2	83.6227
NM_019606.5	MEPCE	MEPCE_21702	m1_positive	rep2	83.6678
NM_020901.2	PHRF1	PHRF1_17348	m1_negative	rep1	83.6817
NM_001135155.1	DPF1	DPF1_19530	m1_negative	rep1	83.8207
NM_003489.3	NRIP1	NRIP1_14918	m2_negative	rep1	83.8823
NM_014671.2	UBE3C	UBE3C_26802	plasmid	rep1	83.8995
NM_014671.2	UBE3C	UBE3C_26802	plasmid	rep2	83.8995
NM_003743.4	NCOA1	NCOA1_22223	m1_positive	rep1	83.9107
NM_015052.3	HECW1	HECW1_26574	m2_positive	rep1	83.9467
NM_005392.3	PHF2	PHF2_22862	m2_negative	rep2	83.9713
NM_001242902.1	AKAP1	AKAP1_17934	m1_positive	rep1	84.0114
NM_001042424.2	WHSC1	WHSC1_26094	m2_negative	rep2	84.0666
NM_003821.5	RIPK2	RIPK2_14322	m2_negative	rep1	84.1587
NM_153046.2	TDRD9	TDRD9_15478	m1_positive	rep1	84.2173
NM_138609.2	H2AFY	H2AFY_20015	m1_negative	rep1	84.2343
NM_013448.2	BAZ1A	BAZ1A_15242	m1_positive	rep2	84.2651
NM_199454.2	PRDM16	PRDM16_23162	m1_negative	rep1	84.3291
NM_152998.2	EZH2	EZH2_26874	m2_negative	rep1	84.4165
NM_001006944.1	RPS6KA4	RPS6KA4_23908	m2_negative	rep2	84.4364
NM_005392.3	PHF2	PHF2_22862	m2_negative	rep1	84.4428
NM_014034.2	ASF1A	ASF1A_18094	m1_positive	rep2	84.6344
NM_138364.2	PRMT10	PRMT10_16334	m1_positive	rep1	84.6487
NM_013351.1	TBX21	TBX21_25340	m1_positive	rep2	84.6775
NM_003852.3	TRIM24	TRIM24_15044	m2_positive	rep1	84.6924
NM_000937.4	POLR2A	POLR2A_15052	m2_positive	rep2	84.824
NM_003079.4	SMARCE1	SMARCE1_24742	input	rep1	84.8409
NM_001001520.1	HDGFRP2	HDGFRP2_20266	m1_positive	rep1	84.9499
NM_032569.3	GLYR1	GLYR1_19948	m1_positive	rep2	84.9797
NM_001145357.1	SIN3A	SIN3A_24366	m1_positive	rep1	84.98
NM_012241.4	SIRT5	SIRT5_17356	m2_negative	rep1	84.9844
NM_019606.5	MEPCE	MEPCE_21702	m2_negative	rep1	84.9971
NM_005360.4	MAF	MAF_21500	m2_positive	rep1	85.0236
NM_005652.3	TERF2	TERF2_14222	m1_negative	rep1	85.1585
NM_031923.2	TAF3	TAF3_14650	m1_positive	rep1	85.1796
NM_006186.3	NR4A2	NR4A2_22444	m1_negative	rep1	85.1915
NM_020227.2	PRDM9	PRDM9_14662	m2_positive	rep2	85.2014
NM_198040.2	PHC2	PHC2_16270	m1_positive	rep1	85.207
NM_001242902.1	AKAP1	AKAP1_17934	m1_negative	rep1	85.4582
NM_016587.3	CBX3	CBX3_17614	m1_positive	rep2	85.544
NM_014671.2	UBE3C	UBE3C_26802	input	rep1	85.5592
NM_001037540.1	SCML1	SCML1_24054	m2_positive	rep2	85.5607
NM_014034.2	ASF1A	ASF1A_18094	m1_positive	rep1	85.5829
NM_032329.4	ING5	ING5_14950	m1_positive	rep1	85.6152
NM_001127217.2	SMAD9	SMAD9_24570	m1_negative	rep1	85.6993
NM_020227.2	PRDM9	PRDM9_14662	input	rep1	85.7017
NM_003797.3	EED	EED_19566	m1_negative	rep1	85.8216
NM_016111.3	TELO2	TELO2_25546	input	rep2	85.8264
NM_019592.5	RNF20	RNF20_23790	m1_positive	rep1	85.8371
NM_001273.2	CHD4	CHD4_19110	m2_negative	rep1	85.8725
NM_001379.2	DNMT1	DNMT1_19462	m1_positive	rep2	85.889
NM_014109.3	ATAD2	ATAD2_18190	m1_negative	rep1	85.9539
NM_015052.3	HECW1	HECW1_17518	m1_positive	rep1	86.0192
NM_015906.3	TRIM33	TRIM33_25868	m2_positive	rep1	86.0317
NM_014314.3	DDX58	DDX58_16522	m1_negative	rep1	86.0615
NM_000536.3	RAG2	RAG2_23538	m1_positive	rep2	86.1089
NM_015906.3	TRIM33	TRIM33_25870	m2_positive	rep1	86.251
NM_024773.2	KDM8	KDM8_21062	m2_negative	rep2	86.2598
NR_037947.1	NSUN2	NSUN2_22502	m2_positive	rep2	86.2994
NM_001535.3	PRMT2	PRMT2_23326	m1_positive	rep1	86.3379
NM_001037540.1	SCML1	SCML1_14702	m1_positive	rep1	86.3428
NM_005441.2	CHAF1B	CHAF1B_15687	m1_negative	rep1	86.3792
NR_040086.1	SETD4	SETD4_24174	m1_positive	rep2	86.5254
NM_032329.4	ING5	ING5_14950	m2_negative	rep1	86.5265
NM_003298.3	NR2C2	NR2C2_25334	m1_negative	rep1	86.5854
NM_005334.2	HCFC1	HCFC1_20078	m2_negative	rep1	86.6258
NM_032482.2	DOT1L	DOT1L_19518	m1_positive	rep1	86.7549
NM_015052.3	HECW1	HECW1_17518	input	rep2	86.7769
NM_001037540.1	SCML1	SCML1_24054	m1_positive	rep2	86.8115
NM_005746.2	NAMPT	NAMPT_26285	m2_positive	rep1	86.891
NM_020746.4	MAVS	MAVS_21510	m2_negative	rep1	86.9209
NM_017780.3	CHD7	CHD7_19150	m1_negative	rep1	86.9277
NM_006981.3	NR4A3	NR4A3_14894	m2_positive	rep1	86.943
NM_002165.3	ID1	ID1_20686	m1_negative	rep1	86.9843
NM_015409.4	EP400	EP400_17570	m1_positive	rep2	86.9897
NM_012241.4	SIRT5	SIRT5_24422	m1_negative	rep1	87.0122
NM_003298.3	NR2C2	NR2C2_25330	m2_negative	rep1	87.02
NM_024947.3	PHC3	PHC3_22716	m2_positive	rep2	87.0246
NM_005243.3	EWSR1	EWSR1_19694	plasmid	rep1	87.1533
NM_005243.3	EWSR1	EWSR1_19694	plasmid	rep2	87.1533
NM_020227.2	PRDM9	PRDM9_14662	input	rep2	87.1544
NM_001114632.1	JMJD7	JMJD7_16998	m1_positive	rep2	87.1615
NM_004958.3	MTOR	MTOR_26306	m1_negative	rep1	87.1793
NM_004242.3	HMGN3	HMGN3_20614	plasmid	rep1	87.2044
NM_004242.3	HMGN3	HMGN3_20614	plasmid	rep2	87.2044
NM_005762.2	TRIM28	TRIM28_25846	m2_negative	rep2	87.2247
NM_007250.4	KLF8	KLF8_21374	m1_positive	rep2	87.2566
NM_004412.5	TRDMT1	TRDMT1_25826	m1_positive	rep2	87.2723
NM_003079.4	SMARCE1	SMARCE1_24742	m1_negative	rep1	87.2796
NM_020746.4	MAVS	MAVS_21518	m2_negative	rep2	87.2933
NM_017984.4	ZCWPW1	ZCWPW1_26174	m2_negative	rep2	87.3529
NM_013282.3	UHRF1	UHRF1_25996	m2_negative	rep1	87.407
NM_003797.3	EED	EED_19566	input	rep2	87.4467
NM_004242.3	HMGN3	HMGN3_20612	m1_negative	rep1	87.475
NM_001199155.1	KAT7	KAT7_22150	m2_negative	rep1	87.5822
NM_006186.3	NR4A2	NR4A2_22444	m2_positive	rep1	87.638
NM_014109.3	ATAD2	ATAD2_18190	m2_negative	rep2	87.6492
NM_021975.3	RELA	RELA_14498	m1_positive	rep2	87.7461
NM_030632.1	ASXL3	ASXL3_18172	m2_positive	rep2	87.7737
NM_006437.3	PARP4	PARP4_22590	m1_negative	rep1	87.8555
NM_006981.3	NR4A3	NR4A3_14894	m1_positive	rep2	87.8694
NM_020395.3	INTS12	INTS12_20902	m2_negative	rep1	87.874
NM_003146.2	SSRP1	SSRP1_25078	input	rep2	88.0058
NM_012406.3	PRDM4	PRDM4_23202	m1_positive	rep1	88.0264
NM_152293.2	TADA2B	TADA2B_25278	m2_positive	rep1	88.0912
NM_002024.5	FMR1	FMR1_19759	m2_positive	rep1	88.1034
NM_177438.2	DICER1	DICER1_26444	m2_positive	rep2	88.2162
NM_015052.3	HECW1	HECW1_17518	m1_positive	rep2	88.2796
NM_000179.2	MSH6	MSH6_21922	m1_negative	rep1	88.2869
NM_024947.3	PHC3	PHC3_22716	m1_positive	rep1	88.2928
NM_001178055.1	PARP8	PARP8_15526	m2_positive	rep2	88.3036
NM_005903.5	SMAD5	SMAD5_24518	m1_positive	rep2	88.3071
NM_004412.5	TRDMT1	TRDMT1_15274	m1_positive	rep1	88.3515
NM_012074.3	DPF3	DPF3_19558	m2_negative	rep1	88.3524
NM_022491.2	SUDS3	SUDS3_25166	m1_negative	rep1	88.3526
NM_024644.2	C14orf169	C14orf169_18702	input	rep1	88.37
NM_005334.2	HCFC1	HCFC1_20076	input	rep2	88.3978
NM_003079.4	SMARCE1	SMARCE1_24742	m2_positive	rep1	88.4498
NM_001144965.1	NEDD4L	NEDD4L_14062	plasmid	rep1	88.4826
NM_001144965.1	NEDD4L	NEDD4L_14062	plasmid	rep2	88.4826
NM_014390.2	SND1	SND1_15458	m1_positive	rep2	88.607
NM_182919.3	TICAM1	TICAM1_25702	m2_positive	rep2	88.6166
NM_145208.2	MBD3L1	MBD3L1_21578	m1_negative	rep1	88.6569
NM_012406.3	PRDM4	PRDM4_23202	m2_positive	rep1	88.6658
NM_032329.4	ING5	ING5_14950	plasmid	rep1	88.7046
NM_032329.4	ING5	ING5_14950	plasmid	rep2	88.7046
NM_001145260.1	NCOA4	NCOA4_22262	m2_positive	rep2	88.7556
NR_024549.1	DMTF1	DMTF1_19422	m2_positive	rep1	88.775
NM_139048.2	HLTF	HLTF_20450	m2_negative	rep1	88.8674
NM_005933.3	MLL	MLL_16846	m1_negative	rep1	88.872
NM_001184993.1	RNF17	RNF17_23776	input	rep1	88.9527
NM_001256536.1	PRMT8	PRMT8_23406	m1_positive	rep2	88.9858
NM_138933.2	A1CF	A1CF_15598	input	rep1	89.0036
NM_016188.4	ACTL6B	ACTL6B_17734	m1_positive	rep1	89.1196
NM_004755.2	RPS6KA5	RPS6KA5_14082	m1_positive	rep2	89.1777
NM_016329.3	SFMBT1	SFMBT1_24310	m1_positive	rep1	89.1852
NM_014390.2	SND1	SND1_15458	m2_negative	rep1	89.188
NM_001042533.2	MINA	MINA_15834	m2_positive	rep2	89.2764
NM_031407.5	HUWE1	HUWE1_26702	input	rep1	89.329
NM_015866.4	PRDM2	PRDM2_23178	input	rep2	89.3608
NM_001184993.1	RNF17	RNF17_23776	plasmid	rep1	89.3808
NM_001184993.1	RNF17	RNF17_23776	plasmid	rep2	89.3808
NM_005788.3	PRMT3	PRMT3_23348	input	rep1	89.4127
NM_001135155.1	DPF1	DPF1_19530	m2_negative	rep2	89.4137
NM_031407.5	HUWE1	HUWE1_26702	input	rep2	89.4488
NM_003380.3	VIM	VIM_26046	m2_negative	rep1	89.473
NM_002648.3	PIM1	PIM1_17606	m2_negative	rep2	89.4823
NM_003072.3	SMARCA4	SMARCA4_24610	m2_negative	rep1	89.5721
NM_030632.1	ASXL3	ASXL3_18186	plasmid	rep1	89.6289
NM_030632.1	ASXL3	ASXL3_18186	plasmid	rep2	89.6289
NM_016587.3	CBX3	CBX3_17614	input	rep2	89.7186
NM_021078.2	KAT2A	KAT2A_17068	m1_positive	rep2	89.7521
NM_012241.4	SIRT5	SIRT5_17356	input	rep2	89.761
NM_005997.2	VPS72	VPS72_14278	m1_positive	rep2	89.7872
NM_002908.2	REL	REL_15404	m1_positive	rep1	89.8714
NM_013448.2	BAZ1A	BAZ1A_15242	m2_positive	rep2	89.9962
NM_025133.4	FBXO11	FBXO11_19724	m2_positive	rep2	90.0527
NM_001328.2	CTBP1	CTBP1_14466	input	rep2	90.0737
NM_001135155.1	DPF1	DPF1_19530	plasmid	rep1	90.2053
NM_001135155.1	DPF1	DPF1_19530	plasmid	rep2	90.2053
NM_015651.1	PHF19	PHF19_22846	m2_positive	rep2	90.245
NM_001270449.1	UBE3B	UBE3B_26798	m2_negative	rep1	90.3048
NM_014109.3	ATAD2	ATAD2_16398	m1_positive	rep2	90.3077
NM_004973.3	JARID2	JARID2_15770	m2_positive	rep2	90.329
NM_001145357.1	SIN3A	SIN3A_24366	m2_negative	rep1	90.3364
NM_175709.3	CBX7	CBX7_18798	m1_positive	rep2	90.3477
NM_031923.2	TAF3	TAF3_14650	input	rep2	90.4164
NR_038123.1	PSMA3	PSMA3_23444	m2_positive	rep1	90.4195
NM_001184993.1	RNF17	RNF17_23776	m2_negative	rep2	90.4257
NM_001128128.2	ZEB1	ZEB1_17478	m1_positive	rep1	90.4462
NM_152998.2	EZH2	EZH2_26874	m1_negative	rep1	90.4587
NM_181725.3	METTL2A	METTL2A_21758	m2_negative	rep1	90.4904
NM_006037.3	HDAC4	HDAC4_14238	m1_negative	rep1	90.4936
NM_003146.2	SSRP1	SSRP1_25078	input	rep1	90.5356
NM_014034.2	ASF1A	ASF1A_18086	m1_positive	rep2	90.5369
NM_014109.3	ATAD2	ATAD2_18190	m2_positive	rep2	90.5595
NM_181725.3	METTL2A	METTL2A_21758	m2_positive	rep1	90.5746
NM_005334.2	HCFC1	HCFC1_20078	m1_positive	rep1	90.5922
NM_022455.4	NSD1	NSD1_16746	m2_positive	rep1	90.6003
NM_016587.3	CBX3	CBX3_17614	m2_negative	rep1	90.6463
NM_005243.3	EWSR1	EWSR1_19694	input	rep2	90.6833
NM_006037.3	HDAC4	HDAC4_20158	plasmid	rep1	90.6841
NM_006037.3	HDAC4	HDAC4_20158	plasmid	rep2	90.6841
NM_001001520.1	HDGFRP2	HDGFRP2_20262	m2_positive	rep2	90.6913
NM_003743.4	NCOA1	NCOA1_14182	m1_positive	rep1	90.7325
NR_037947.1	NSUN2	NSUN2_22508	m1_positive	rep2	90.7987
NM_001136239.1	PRDM6	PRDM6_23234	m1_negative	rep1	90.8343
NM_016578.3	RSF1	RSF1_15942	plasmid	rep1	90.8706
NM_016578.3	RSF1	RSF1_15942	plasmid	rep2	90.8706
NM_005334.2	HCFC1	HCFC1_20078	plasmid	rep1	90.8746
NM_005334.2	HCFC1	HCFC1_20078	plasmid	rep2	90.8746
NM_001145357.1	SIN3A	SIN3A_16494	m1_positive	rep1	90.8857
NR_037947.1	NSUN2	NSUN2_22502	m2_negative	rep2	90.9077
NM_007121.5	NR1H2	NR1H2_22406	input	rep1	90.9721
NM_001079539.1	XBP1	XBP1_26146	m2_positive	rep1	91.0203
NM_012238.4	SIRT1	SIRT1_24380	m2_negative	rep2	91.076
NM_003146.2	SSRP1	SSRP1_25078	m2_negative	rep1	91.1038
NM_182919.3	TICAM1	TICAM1_25702	m2_negative	rep2	91.1592
NM_030632.1	ASXL3	ASXL3_18186	input	rep1	91.1706
NM_020889.2	PHF12	PHF12_22772	m1_positive	rep1	91.1955
NM_153046.2	TDRD9	TDRD9_25514	m2_negative	rep2	91.2666
NM_013235.4	DROSHA	DROSHA_26466	m1_negative	rep1	91.2859
NM_002524.4	NRAS	NRAS_26350	m2_positive	rep1	91.3553
NM_024831.6	TGS1	TGS1_15590	m2_negative	rep1	91.4179
NM_001135155.1	DPF1	DPF1_19534	input	rep1	91.4505
NM_001042533.2	MINA	MINA_15834	m1_positive	rep1	91.6482
NM_199454.2	PRDM16	PRDM16_23174	m1_positive	rep2	91.7265
NM_020227.2	PRDM9	PRDM9_14662	plasmid	rep1	91.7316
NM_020227.2	PRDM9	PRDM9_14662	plasmid	rep2	91.7316
NM_018263.4	ASXL2	ASXL2_18170	m1_negative	rep1	91.7664
NM_006530.2	YEATS4	YEATS4_26158	m1_negative	rep1	91.7798
NM_007144.2	PCGF2	PCGF2_15164	m2_negative	rep1	91.7924
NM_018091.5	ELP3	ELP3_19628	m2_positive	rep1	91.8334
NM_152998.2	EZH2	EZH2_26862	m1_positive	rep1	91.8623
NM_020227.2	PRDM9	PRDM9_14662	m1_positive	rep1	91.9402
NM_017824.4	MARCH5	MARCH5_17678	input	rep2	91.9773
NM_030665.3	RAI1	RAI1_23550	m2_positive	rep2	92.0416
NM_032482.2	DOT1L	DOT1L_19518	input	rep2	92.1308
NM_015052.3	HECW1	HECW1_17518	plasmid	rep1	92.1386
NM_015052.3	HECW1	HECW1_17518	plasmid	rep2	92.1386
NM_004360.3	CDH1	CDH1_15378	input	rep2	92.1394
NM_032569.3	GLYR1	GLYR1_19948	m2_positive	rep1	92.1595
NM_001256536.1	PRMT8	PRMT8_23406	m2_negative	rep2	92.2043
NM_182641.3	BPTF	BPTF_18470	m1_positive	rep1	92.2176
NM_024947.3	PHC3	PHC3_22716	input	rep1	92.3367
NM_139048.2	HLTF	HLTF_20450	m2_negative	rep2	92.6176
NM_030632.1	ASXL3	ASXL3_18186	m1_positive	rep2	92.6497
NR_037947.1	NSUN2	NSUN2_22502	input	rep1	92.6614
NM_012238.4	SIRT1	SIRT1_14796	m2_negative	rep1	92.6927
NM_014071.3	NCOA6	NCOA6_22282	input	rep1	92.7313
NM_004364.3	CEBPA	CEBPA_14350	m2_negative	rep1	92.8808
NM_001136239.1	PRDM6	PRDM6_23234	input	rep1	92.8926
NM_006981.3	NR4A3	NR4A3_22470	input	rep2	92.9525
NM_012406.3	PRDM4	PRDM4_23202	plasmid	rep1	92.9868
NM_012406.3	PRDM4	PRDM4_23202	plasmid	rep2	92.9868
NM_016323.3	HERC5	HERC5_26670	m2_positive	rep2	93.001
NM_014109.3	ATAD2	ATAD2_18190	plasmid	rep1	93.0409
NM_014109.3	ATAD2	ATAD2_18190	plasmid	rep2	93.0409
NM_032569.3	GLYR1	GLYR1_19948	m2_negative	rep2	93.0538
NM_004739.3	MTA2	MTA2_21958	m1_negative	rep1	93.0861
NM_002524.4	NRAS	NRAS_26350	m2_positive	rep2	93.107
NM_006509.3	RELB	RELB_23695	m2_negative	rep1	93.1205
NM_003852.3	TRIM24	TRIM24_15044	m1_negative	rep1	93.1605
NM_013448.2	BAZ1A	BAZ1A_15242	m2_positive	rep1	93.1876
NM_012238.4	SIRT1	SIRT1_14796	m1_positive	rep2	93.1898
NM_030794.2	TDRD3	TDRD3_15662	input	rep1	93.2451
NM_002524.4	NRAS	NRAS_26350	m1_negative	rep1	93.2769
NM_020889.2	PHF12	PHF12_22772	m2_negative	rep2	93.347
NR_037947.1	NSUN2	NSUN2_22510	m2_negative	rep2	93.468
NM_032482.2	DOT1L	DOT1L_19518	plasmid	rep1	93.4753
NM_032482.2	DOT1L	DOT1L_19518	plasmid	rep2	93.4753
NM_022743.2	SMYD3	SMYD3_24846	m2_negative	rep1	93.4874
NM_017635.3	SUV420H1	SUV420H1_25222	m2_negative	rep2	93.6053
NM_182641.3	BPTF	BPTF_14666	m1_positive	rep2	93.6472
NM_138933.2	A1CF	A1CF_15598	m2_positive	rep2	93.6669
NM_031915.2	SETDB2	SETDB2_24270	m1_negative	rep1	93.6984
NR_037947.1	NSUN2	NSUN2_22502	m2_negative	rep1	93.7337
NM_014314.3	DDX58	DDX58_16522	m2_positive	rep2	93.7525
NM_002524.4	NRAS	NRAS_26350	m1_positive	rep2	93.7535
NM_182641.3	BPTF	BPTF_18470	m2_positive	rep2	93.82
NM_014771.3	RNF40	RNF40_14214	m1_negative	rep1	93.82
NM_016323.3	HERC5	HERC5_26670	m2_positive	rep1	93.8582
NM_016120.3	RLIM	RLIM_14190	m1_negative	rep1	93.9069
NM_001184993.1	RNF17	RNF17_23776	m2_negative	rep1	93.9071
NM_005243.3	EWSR1	EWSR1_19694	input	rep1	93.9508
NM_199454.2	PRDM16	PRDM16_23174	input	rep1	93.9986
NM_004426.2	PHC1	PHC1_17639	m2_positive	rep2	94.0823
NM_032482.2	DOT1L	DOT1L_19518	input	rep1	94.0992
NM_001101802.1	PHF21A	PHF21A_22918	m1_positive	rep2	94.1582
NM_005788.3	PRMT3	PRMT3_23348	m2_negative	rep2	94.1851
NM_199454.2	PRDM16	PRDM16_23164	m2_positive	rep1	94.2925
NM_013282.3	UHRF1	UHRF1_25996	m1_positive	rep2	94.3087
NM_001200.2	BMP2	BMP2_18402	m2_positive	rep2	94.3218
NM_001003652.3	SMAD2	SMAD2_24484	m2_negative	rep1	94.3226
NM_182641.3	BPTF	BPTF_18470	m1_positive	rep2	94.3505
NM_016587.3	CBX3	CBX3_15138	m1_positive	rep1	94.3859
XR_017086.3	Luc	Luc_262002	m2_positive	rep1	94.4162
NM_002931.3	RING1	RING1_15154	m1_positive	rep1	94.4199
NM_020998.3	MST1	MST1_17422	m1_positive	rep1	94.46
NM_004364.3	CEBPA	CEBPA_18958	m2_positive	rep1	94.4636
NM_001135155.1	DPF1	DPF1_19534	m1_positive	rep1	94.4672
NM_015048.1	SETD1B	SETD1B_24134	input	rep1	94.5189
NM_018091.5	ELP3	ELP3_19628	m2_positive	rep2	94.5516
NM_001242902.1	AKAP1	AKAP1_17926	m1_positive	rep2	94.5847
NM_005788.3	PRMT3	PRMT3_23348	input	rep2	94.5872
NM_022743.2	SMYD3	SMYD3_24846	m1_positive	rep1	94.7028
NM_030794.2	TDRD3	TDRD3_15662	plasmid	rep1	94.7119
NM_030794.2	TDRD3	TDRD3_15662	plasmid	rep2	94.7119
NM_198795.1	TDRD1	TDRD1_25422	m2_positive	rep1	94.9479
NM_001145357.1	SIN3A	SIN3A_16494	m2_positive	rep2	94.9875
NM_004154.3	P2RY6	P2RY6_14478	m2_positive	rep2	94.9928
NM_030632.1	ASXL3	ASXL3_18172	m2_positive	rep1	95.0756
NM_003380.3	VIM	VIM_26046	m1_positive	rep2	95.2354
NM_013351.1	TBX21	TBX21_25342	m1_negative	rep1	95.2643
NM_001242902.1	AKAP1	AKAP1_17926	m2_negative	rep2	95.2672
NM_001127217.2	SMAD9	SMAD9_24574	m2_positive	rep2	95.3549
NM_000937.4	POLR2A	POLR2A_15052	m2_negative	rep1	95.4152
NM_001130173.1	MYB	MYB_22022	m2_negative	rep2	95.4523
NM_005251.2	FOXC2	FOXC2_14546	m1_positive	rep1	95.4729
NM_015153.2	PHF3	PHF3_14818	m1_positive	rep1	95.4735
NM_003489.3	NRIP1	NRIP1_14918	m1_negative	rep1	95.5052
NM_003298.3	NR2C2	NR2C2_25330	m2_positive	rep2	95.5151
NM_006892.3	DNMT3B	DNMT3B_19490	m2_positive	rep2	95.5332
NM_004755.2	RPS6KA5	RPS6KA5_14082	m1_positive	rep1	95.5343
NM_005243.3	EWSR1	EWSR1_19698	m2_positive	rep2	95.5664
NM_001379.2	DNMT1	DNMT1_19462	plasmid	rep1	95.5939
NM_001379.2	DNMT1	DNMT1_19462	plasmid	rep2	95.5939
NM_004242.3	HMGN3	HMGN3_20614	m1_positive	rep1	95.6071
NM_003482.3	MLL2	MLL2_21802	m2_positive	rep1	95.6567
NM_003601.3	SMARCA5	SMARCA5_24626	m1_positive	rep2	95.6893
NM_005762.2	TRIM28	TRIM28_25846	input	rep2	95.6946
NM_018699.2	PRDM5	PRDM5_14540	m2_positive	rep1	95.7368
NM_012406.3	PRDM4	PRDM4_23202	m2_positive	rep2	95.8424
NM_005322.2	HIST1H1B	HIST1H1B_15750	m1_negative	rep1	95.8712
NM_001080424.1	KDM6B	KDM6B_21350	m2_positive	rep1	95.8801
NM_020327.3	ACVR1B	ACVR1B_17806	input	rep2	95.8873
NM_024773.2	KDM8	KDM8_21062	m1_negative	rep1	95.9737
NR_033717.1	SCML2	SCML2_14874	m1_positive	rep1	96.0494
NM_003852.3	TRIM24	TRIM24_25834	m2_positive	rep2	96.082
NM_005788.3	PRMT3	PRMT3_23348	m2_positive	rep1	96.1073
NM_080424.2	SP110	SP110_24990	m2_negative	rep1	96.1605
NM_001110822.1	TDRD12	TDRD12_25454	m1_negative	rep1	96.1711
NM_021619.2	PRDM12	PRDM12_23116	m1_positive	rep1	96.239
NM_002908.2	REL	REL_15406	m1_positive	rep1	96.4885
NM_004412.5	TRDMT1	TRDMT1_15274	m2_positive	rep2	96.5299
NM_003073.3	SMARCB1	SMARCB1_17086	input	rep1	96.5743
NM_006437.3	PARP4	PARP4_22590	m1_positive	rep2	96.6547
NM_199454.2	PRDM16	PRDM16_23174	input	rep2	96.7066
NM_004825.2	CDY2A	CDY2A_18910	m2_positive	rep2	96.7326
NM_005903.5	SMAD5	SMAD5_24518	input	rep1	96.7682
NM_017824.4	MARCH5	MARCH5_17674	m2_negative	rep2	96.8035
NM_003922.3	HERC1	HERC1_26604	m2_positive	rep2	96.872
NM_006530.2	YEATS4	YEATS4_26158	m1_positive	rep2	96.8762
NM_001273.2	CHD4	CHD4_19110	m1_positive	rep2	96.9303
NM_002106.3	H2AFZ	H2AFZ_20052	m1_negative	rep1	96.9558
NM_031407.5	HUWE1	HUWE1_26702	m2_negative	rep2	96.9788
NM_032701.3	SUV420H2	SUV420H2_16006	m2_negative	rep2	96.9811
NM_000660.4	TGFB1	TGFB1_25676	m2_positive	rep1	97.0919
NM_001991.3	EZH1	EZH1_19710	m2_positive	rep1	97.103
NM_054034.2	FN1	FN1_19788	m2_negative	rep1	97.1287
NM_001128128.2	ZEB1	ZEB1_17478	m2_negative	rep1	97.1623
NM_016604.3	KDM3B	KDM3B_21220	m2_positive	rep2	97.2116
NM_014034.2	ASF1A	ASF1A_18086	m2_positive	rep2	97.4042
NM_014390.2	SND1	SND1_15458	input	rep2	97.4736
NM_024504.3	PRDM14	PRDM14_14764	m1_positive	rep1	97.6342
NR_033717.1	SCML2	SCML2_14874	m2_positive	rep1	97.6625
NR_024549.1	DMTF1	DMTF1_19422	input	rep2	97.6979
NM_018263.4	ASXL2	ASXL2_18170	m2_positive	rep1	97.7125
NM_002451.3	MTAP	MTAP_14282	m2_negative	rep2	97.8016
NM_001379.2	DNMT1	DNMT1_19462	input	rep1	97.9024
NM_014034.2	ASF1A	ASF1A_18094	m2_negative	rep1	97.9111
NM_002460.3	IRF4	IRF4_20934	m1_negative	rep1	97.9184
NM_014071.3	NCOA6	NCOA6_22282	m2_negative	rep1	97.9658
NM_003797.3	EED	EED_19566	input	rep1	97.9999
NM_004494.2	HDGF	HDGF_20238	m1_positive	rep2	98.026
NM_005322.2	HIST1H1B	HIST1H1B_15750	m2_negative	rep2	98.0275
NM_138609.2	H2AFY	H2AFY_20015	m2_positive	rep1	98.0482
NM_004755.2	RPS6KA5	RPS6KA5_14082	m2_positive	rep2	98.1192
NM_005342.2	HMGB3	HMGB3_20540	m2_negative	rep2	98.1462
NM_001328.2	CTBP1	CTBP1_14466	m2_positive	rep2	98.1662
NM_030625.2	TET1	TET1_25606	m1_positive	rep1	98.1739
NM_021975.3	RELA	RELA_14498	m2_negative	rep1	98.2233
NM_022365.3	DNAJC1	DNAJC1_19428	m1_negative	rep1	98.2653
NM_153812.2	PHF13	PHF13_22778	m2_positive	rep2	98.2735
NM_015559.2	SETBP1	SETBP1_24110	m1_positive	rep1	98.3723
NM_003482.3	MLL2	MLL2_21802	input	rep2	98.3914
NM_004412.5	TRDMT1	TRDMT1_25830	m2_positive	rep2	98.3945
NM_015557.2	CHD5	CHD5_19134	m1_positive	rep1	98.4721
NM_001135155.1	DPF1	DPF1_19530	m2_positive	rep2	98.4952
NM_001003931.2	PARP3	PARP3_22574	m2_negative	rep1	98.517
NM_000536.3	RAG2	RAG2_23538	m1_positive	rep1	98.5404
NM_000020.2	ACVRL1	ACVRL1_17836	m1_negative	rep1	98.5504
NM_014771.3	RNF40	RNF40_14214	m2_negative	rep1	98.5569
NM_004364.3	CEBPA	CEBPA_14350	m2_positive	rep1	98.6316
NM_001379.2	DNMT1	DNMT1_19462	m2_positive	rep1	98.7775
NM_020327.3	ACVR1B	ACVR1B_17806	m1_positive	rep1	98.8019
NM_194281.3	INO80C	INO80C_20862	m1_negative	rep1	98.8184
NM_018699.2	PRDM5	PRDM5_23218	m2_positive	rep1	98.8868
NM_002165.3	ID1	ID1_20686	input	rep2	98.992
NM_017769.3	G2E3	G2E3_19902	m1_negative	rep1	99.0425
NM_001146705.1	KDM5D	KDM5D_21310	m2_negative	rep1	99.1337
NM_004364.3	CEBPA	CEBPA_18954	m2_positive	rep2	99.1388
NR_038123.1	PSMA3	PSMA3_23442	m1_positive	rep1	99.1763
NM_001270449.1	UBE3B	UBE3B_26798	plasmid	rep1	99.196
NM_001270449.1	UBE3B	UBE3B_26798	plasmid	rep2	99.196
NM_173587.3	RCOR2	RCOR2_23630	m1_negative	rep1	99.2016
NM_181725.3	METTL2A	METTL2A_21758	m2_negative	rep2	99.2185
NM_015001.2	SPEN	SPEN_25038	m2_negative	rep2	99.2202
NM_032758.3	PHF5A	PHF5A_22959	m2_positive	rep1	99.2856
NM_182919.3	TICAM1	TICAM1_25702	m2_positive	rep1	99.2861
NM_016018.4	PHF20L1	PHF20L1_15902	m2_positive	rep1	99.3037
NM_139135.2	ARID1A	ARID1A_17956	m1_positive	rep2	99.3217
NM_016578.3	RSF1	RSF1_15942	m2_positive	rep1	99.3404
NM_001128430.1	SMARCAD1	SMARCAD1_15462	m1_negative	rep1	99.3983
NM_020746.4	MAVS	MAVS_21518	input	rep1	99.425
NM_001126115.1	TP53	TP53_25774	m1_negative	rep1	99.4389
NM_003922.3	HERC1	HERC1_26604	input	rep1	99.5208
NM_006437.3	PARP4	PARP4_22594	m1_negative	rep1	99.564
NM_005903.5	SMAD5	SMAD5_24518	m2_positive	rep1	99.5702
NM_032758.3	PHF5A	PHF5A_22959	m2_positive	rep2	99.5871
NM_003925.1	MBD4	MBD4_21630	m1_positive	rep2	99.7103
NM_001001520.1	HDGFRP2	HDGFRP2_20266	input	rep1	99.7777
NM_182641.3	BPTF	BPTF_18470	m2_negative	rep1	99.8503
NM_004494.2	HDGF	HDGF_20238	m1_positive	rep1	99.9068
NM_003069.3	SMARCA1	SMARCA1_24582	m2_positive	rep2	99.914
NM_003743.4	NCOA1	NCOA1_14182	m2_negative	rep1	99.9313
NM_007371.3	BRD3	BRD3_18510	m1_negative	rep1	99.9408
NM_003925.1	MBD4	MBD4_21630	m2_negative	rep1	100.053
NM_017824.4	MARCH5	MARCH5_17674	m1_positive	rep2	100.071
NM_024947.3	PHC3	PHC3_22716	m2_positive	rep1	100.099
NM_004412.5	TRDMT1	TRDMT1_25826	m2_positive	rep2	100.122
NM_002165.3	ID1	ID1_20686	m1_positive	rep2	100.203
NM_007250.4	KLF8	KLF8_21374	m2_negative	rep2	100.216
NM_001618.3	PARP1	PARP1_22542	m2_negative	rep2	100.221
NM_199454.2	PRDM16	PRDM16_23174	m2_negative	rep1	100.229
NM_005322.2	HIST1H1B	HIST1H1B_15750	m2_positive	rep1	100.243
NM_003079.4	SMARCE1	SMARCE1_24742	m2_negative	rep2	100.25
NM_019606.5	MEPCE	MEPCE_21710	m1_negative	rep1	100.252
NM_002931.3	RING1	RING1_23714	m2_positive	rep2	100.276
NM_139048.2	HLTF	HLTF_20450	m1_negative	rep1	100.285
NM_015052.3	HECW1	HECW1_26574	m2_positive	rep2	100.325
NM_005762.2	TRIM28	TRIM28_25846	plasmid	rep1	100.344
NM_005762.2	TRIM28	TRIM28_25846	plasmid	rep2	100.344
NM_001198.3	PRDM1	PRDM1_23070	plasmid	rep1	100.362
NM_001198.3	PRDM1	PRDM1_23070	plasmid	rep2	100.362
NM_004412.5	TRDMT1	TRDMT1_25826	m1_negative	rep1	100.377
NM_001101802.1	PHF21A	PHF21A_22916	m2_positive	rep1	100.399
NM_031407.5	HUWE1	HUWE1_26702	m1_positive	rep2	100.404
NM_005762.2	TRIM28	TRIM28_17246	m1_negative	rep1	100.425
NM_012241.4	SIRT5	SIRT5_17356	plasmid	rep1	100.427
NM_012241.4	SIRT5	SIRT5_17356	plasmid	rep2	100.427
NM_153809.2	TAF1L	TAF1L_16260	m2_positive	rep1	100.447
NM_001005366.1	KDM2B	KDM2B_21198	m1_negative	rep1	100.467
NM_001200.2	BMP2	BMP2_18402	m1_positive	rep2	100.476
NM_024947.3	PHC3	PHC3_22714	m2_positive	rep1	100.479
NM_019606.5	MEPCE	MEPCE_21702	input	rep2	100.534
NM_182931.2	MLL5	MLL5_16526	m2_positive	rep1	100.568
NM_016578.3	RSF1	RSF1_15942	m2_positive	rep2	100.593
NM_001203.2	BMPR1B	BMPR1B_18442	m1_negative	rep1	100.611
NM_021078.2	KAT2A	KAT2A_17070	m2_positive	rep1	100.68
NM_014712.1	SETD1A	SETD1A_16142	m1_positive	rep2	100.684
NM_016323.3	HERC5	HERC5_26670	m1_positive	rep2	100.83
NM_030665.3	RAI1	RAI1_23550	m2_negative	rep1	100.836
NM_003132.2	SRM	SRM_25062	m2_negative	rep1	100.859
NM_012237.3	SIRT2	SIRT2_24382	m2_positive	rep2	100.881
NM_014390.2	SND1	SND1_15458	plasmid	rep1	100.887
NM_014390.2	SND1	SND1_15458	plasmid	rep2	100.887
NM_005342.2	HMGB3	HMGB3_20552	m2_positive	rep1	101.003
NM_002051.2	GATA3	GATA3_16966	input	rep2	101.013
NM_020327.3	ACVR1B	ACVR1B_17806	m2_negative	rep2	101.076
NM_173464.3	L3MBTL4	L3MBTL4_21450	m2_positive	rep2	101.083
NM_015409.4	EP400	EP400_17570	plasmid	rep1	101.123
NM_015409.4	EP400	EP400_17570	plasmid	rep2	101.123
NM_014671.2	UBE3C	UBE3C_26802	m2_negative	rep1	101.146
NR_024549.1	DMTF1	DMTF1_19422	m2_positive	rep2	101.154
NM_020227.2	PRDM9	PRDM9_14662	m2_positive	rep1	101.192
NM_004217.3	AURKB	AURKB_18286	m1_negative	rep1	101.205
NM_016578.3	RSF1	RSF1_15942	m1_positive	rep1	101.211
NM_001105.4	ACVR1	ACVR1_14018	m1_negative	rep1	101.268
NM_006037.3	HDAC4	HDAC4_17102	m2_negative	rep1	101.312
NM_004217.3	AURKB	AURKB_18286	input	rep1	101.328
NM_152998.2	EZH2	EZH2_26874	m1_positive	rep1	101.331
NM_005322.2	HIST1H1B	HIST1H1B_15750	m1_positive	rep2	101.351
NM_005243.3	EWSR1	EWSR1_19698	m1_negative	rep1	101.36
NM_018091.5	ELP3	ELP3_19628	input	rep2	101.366
NM_001105.4	ACVR1	ACVR1_14018	m2_negative	rep1	101.371
NM_001135155.1	DPF1	DPF1_19534	m1_positive	rep2	101.39
NM_001242902.1	AKAP1	AKAP1_17934	m2_negative	rep1	101.399
NM_020649.2	CBX8	CBX8_17258	m1_negative	rep1	101.403
NM_002908.2	REL	REL_15406	m2_negative	rep1	101.476
NM_015557.2	CHD5	CHD5_19134	m1_positive	rep2	101.488
NM_019592.5	RNF20	RNF20_23794	m1_positive	rep1	101.492
NM_018489.2	ASH1L	ASH1L_18122	m1_positive	rep1	101.503
NM_017824.4	MARCH5	MARCH5_17674	m1_negative	rep1	101.517
NM_005903.5	SMAD5	SMAD5_24518	m2_negative	rep2	101.524
NM_006534.3	NCOA3	NCOA3_22250	m2_negative	rep1	101.531
NM_012074.3	DPF3	DPF3_19558	input	rep1	101.536
NM_001008541.1	MXI1	MXI1_22010	m1_negative	rep1	101.613
NM_025134.4	CHD9	CHD9_19186	m1_positive	rep2	101.648
NM_201282.1	EGFR	EGFR_15876	m1_negative	rep1	101.667
NM_003079.4	SMARCE1	SMARCE1_24742	input	rep2	101.698
NM_001792.3	CDH2	CDH2_17470	m2_negative	rep1	101.739
NM_001256536.1	PRMT8	PRMT8_23406	m2_positive	rep2	101.768
NM_020920.3	CHD8	CHD8_19170	m2_positive	rep2	101.788
NM_004364.3	CEBPA	CEBPA_18954	m2_negative	rep1	101.81
NM_003073.3	SMARCB1	SMARCB1_17086	m1_positive	rep1	101.856
NM_015695.2	BRPF3	BRPF3_18638	m1_negative	rep1	101.886
NM_001127217.2	SMAD9	SMAD9_24574	input	rep1	101.893
NM_015559.2	SETBP1	SETBP1_24110	m2_positive	rep1	101.922
NM_005392.3	PHF2	PHF2_22862	input	rep2	101.939
NM_014034.2	ASF1A	ASF1A_18086	m2_positive	rep1	101.963
NM_001273.2	CHD4	CHD4_19118	m1_positive	rep2	101.969
NM_020889.2	PHF12	PHF12_22770	m1_negative	rep1	102.04
NM_020998.3	MST1	MST1_17422	m1_positive	rep2	102.048
NM_003927.4	MBD2	MBD2_21554	m2_negative	rep1	102.057
NM_005802.4	TOPORS	TOPORS_16954	m2_positive	rep1	102.057
NM_001042683.2	SHPRH	SHPRH_14572	m1_negative	rep1	102.058
NM_003852.3	TRIM24	TRIM24_25834	m1_positive	rep1	102.091
NM_032199.2	ARID5B	ARID5B_18078	m1_positive	rep2	102.116
NM_024773.2	KDM8	KDM8_21062	input	rep1	102.166
NM_000536.3	RAG2	RAG2_23538	m2_positive	rep1	102.212
NM_001207042.2	PRMT1	PRMT1_15292	m2_negative	rep2	102.231
NM_002024.5	FMR1	FMR1_19759	m1_positive	rep1	102.264
NM_031407.5	HUWE1	HUWE1_26702	m2_negative	rep1	102.311
NM_014109.3	ATAD2	ATAD2_18190	m2_negative	rep1	102.333
NM_001128128.2	ZEB1	ZEB1_17478	m2_positive	rep2	102.355
NM_024504.3	PRDM14	PRDM14_14764	m2_negative	rep2	102.39
NM_004412.5	TRDMT1	TRDMT1_15276	input	rep2	102.393
NM_001166448.1	HDAC8	HDAC8_20202	m2_positive	rep1	102.411
NR_024549.1	DMTF1	DMTF1_19422	input	rep1	102.415
NM_024297.2	PHF23	PHF23_17004	m1_negative	rep1	102.441
NM_182641.3	BPTF	BPTF_18470	m2_positive	rep1	102.539
NM_138609.2	H2AFY	H2AFY_20007	m1_negative	rep1	102.566
NM_014712.1	SETD1A	SETD1A_16142	m2_negative	rep1	102.584
NM_054034.2	FN1	FN1_19788	m2_positive	rep1	102.619
NM_001198.3	PRDM1	PRDM1_23070	m2_positive	rep2	102.79
NM_001136041.2	HDAC11	HDAC11_20110	m2_negative	rep1	102.797
NM_003601.3	SMARCA5	SMARCA5_24626	m1_negative	rep1	102.828
NM_016329.3	SFMBT1	SFMBT1_24310	m2_negative	rep1	102.876
NM_001145104.1	SMAD3	SMAD3_24490	input	rep1	102.887
NM_138933.2	A1CF	A1CF_15598	m2_negative	rep2	102.889
NM_006892.3	DNMT3B	DNMT3B_19490	m1_positive	rep2	102.918
NM_139048.2	HLTF	HLTF_20450	m2_positive	rep1	102.925
NM_001005920.2	JMJD8	JMJD8_17262	m1_negative	rep1	102.943
NM_005243.3	EWSR1	EWSR1_19694	m2_negative	rep2	102.948
NM_002024.5	FMR1	FMR1_19766	input	rep2	102.968
NM_020382.3	SETD8	SETD8_24242	m2_positive	rep1	103.019
NM_138933.2	A1CF	A1CF_15598	plasmid	rep1	103.024
NM_138933.2	A1CF	A1CF_15598	plasmid	rep2	103.024
NM_003799.1	RNMT	RNMT_23844	m1_negative	rep1	103.054
NM_001144965.1	NEDD4L	NEDD4L_14062	m2_negative	rep2	103.089
NM_016323.3	HERC5	HERC5_26670	m1_positive	rep1	103.114
NM_001991.3	EZH1	EZH1_19710	m1_positive	rep1	103.114
NM_015557.2	CHD5	CHD5_15110	m1_negative	rep1	103.157
XR_017086.3	Luc	Luc_262002	m1_positive	rep2	103.215
NM_001199155.1	KAT7	KAT7_22150	m2_positive	rep1	103.32
NM_020228.2	PRDM10	PRDM10_23084	m2_positive	rep1	103.322
NM_003146.2	SSRP1	SSRP1_25078	plasmid	rep1	103.401
NM_003146.2	SSRP1	SSRP1_25078	plasmid	rep2	103.401
NM_138364.2	PRMT10	PRMT10_16334	m2_negative	rep1	103.416
NM_001256536.1	PRMT8	PRMT8_23406	plasmid	rep1	103.463
NM_001256536.1	PRMT8	PRMT8_23406	plasmid	rep2	103.463
NM_005612.4	REST	REST_14518	m1_positive	rep2	103.466
NM_004329.2	BMPR1A	BMPR1A_18422	m2_negative	rep2	103.491
NM_001110822.1	TDRD12	TDRD12_25450	m2_negative	rep1	103.582
NM_001270.2	CHD1	CHD1_15055	m2_negative	rep1	103.583
NM_001145357.1	SIN3A	SIN3A_24366	m2_positive	rep1	103.586
NM_001244580.1	TRRAP	TRRAP_25898	m2_positive	rep2	103.601
NM_020920.3	CHD8	CHD8_19170	m2_negative	rep1	103.609
NM_001146705.1	KDM5D	KDM5D_21314	m1_negative	rep1	103.618
NM_024947.3	PHC3	PHC3_22716	m2_negative	rep2	103.632
NM_016436.4	PHF20	PHF20_22874	m2_negative	rep2	103.635
NM_012237.3	SIRT2	SIRT2_24382	m1_positive	rep2	103.649
NM_004667.5	HERC2	HERC2_26622	input	rep1	103.659
NM_004412.5	TRDMT1	TRDMT1_15274	m2_positive	rep1	103.735
NM_182641.3	BPTF	BPTF_14666	m1_positive	rep1	103.742
NM_001005271.2	CHD3	CHD3_19094	m1_negative	rep1	103.763
NM_021078.2	KAT2A	KAT2A_17070	m2_positive	rep2	103.798
NM_005967.3	NAB2	NAB2_22214	m1_positive	rep1	103.83
NM_003743.4	NCOA1	NCOA1_14182	m2_positive	rep1	103.854
NM_024947.3	PHC3	PHC3_22716	input	rep2	103.856
NM_005746.2	NAMPT	NAMPT_26285	m1_positive	rep1	103.925
NM_012074.3	DPF3	DPF3_19558	plasmid	rep1	103.939
NM_012074.3	DPF3	DPF3_19558	plasmid	rep2	103.939
NM_002051.2	GATA3	GATA3_16966	m1_positive	rep1	103.953
NM_003884.4	KAT2B	KAT2B_14766	m2_positive	rep2	103.962
NM_001144965.1	NEDD4L	NEDD4L_14062	input	rep1	104.002
NM_032701.3	SUV420H2	SUV420H2_16006	input	rep2	104.007
NM_138364.2	PRMT10	PRMT10_16334	input	rep2	104.014
NM_001006944.1	RPS6KA4	RPS6KA4_16174	m2_positive	rep2	104.065
NM_013393.1	FTSJ2	FTSJ2_19846	input	rep1	104.079
NM_001105.4	ACVR1	ACVR1_14018	m1_positive	rep1	104.082
NM_018263.4	ASXL2	ASXL2_18170	m2_negative	rep2	104.127
NM_001079539.1	XBP1	XBP1_26146	m1_negative	rep1	104.129
NM_005903.5	SMAD5	SMAD5_24518	plasmid	rep1	104.134
NM_005903.5	SMAD5	SMAD5_24518	plasmid	rep2	104.134
NM_015052.3	HECW1	HECW1_26574	m2_negative	rep2	104.192
NM_199454.2	PRDM16	PRDM16_23174	m1_negative	rep1	104.222
NM_015559.2	SETBP1	SETBP1_24110	m2_positive	rep2	104.225
NM_001136239.1	PRDM6	PRDM6_23234	m2_positive	rep2	104.305
NM_017635.3	SUV420H1	SUV420H1_25222	input	rep2	104.314
NM_006981.3	NR4A3	NR4A3_14894	plasmid	rep1	104.325
NM_006981.3	NR4A3	NR4A3_14894	plasmid	rep2	104.325
NM_001135155.1	DPF1	DPF1_19534	input	rep2	104.365
NR_037947.1	NSUN2	NSUN2_22510	m1_positive	rep1	104.385
NM_031923.2	TAF3	TAF3_14650	m2_negative	rep1	104.397
NM_005537.4	ING1	ING1_20766	m2_negative	rep2	104.423
NM_003601.3	SMARCA5	SMARCA5_24621	m2_positive	rep1	104.423
NM_007121.5	NR1H2	NR1H2_22406	m1_positive	rep1	104.428
NM_001005366.1	KDM2B	KDM2B_21198	m2_negative	rep1	104.512
NR_037607.1	UCHL5	UCHL5_25994	m2_positive	rep1	104.549
NM_001164425.1	MBD3L3	MBD3L3_21607	m1_negative	rep1	104.595
NM_003079.4	SMARCE1	SMARCE1_24742	m1_positive	rep1	104.607
NM_006282.2	STK4	STK4_25156	m2_negative	rep2	104.661
NM_016436.4	PHF20	PHF20_22874	m1_positive	rep1	104.667
NM_006186.3	NR4A2	NR4A2_22446	m1_negative	rep1	104.762
NM_015906.3	TRIM33	TRIM33_25868	m2_negative	rep2	104.765
NM_022079.2	HERC4	HERC4_26662	m1_negative	rep1	104.778
NM_003079.4	SMARCE1	SMARCE1_24742	plasmid	rep1	104.778
NM_003079.4	SMARCE1	SMARCE1_24742	plasmid	rep2	104.778
NM_153046.2	TDRD9	TDRD9_15478	m2_positive	rep1	104.781
NM_018137.2	PRMT6	PRMT6_15254	input	rep2	104.786
NM_014712.1	SETD1A	SETD1A_24118	m1_negative	rep1	104.928
NM_005342.2	HMGB3	HMGB3_14759	m2_negative	rep1	104.957
NM_020920.3	CHD8	CHD8_19170	m2_positive	rep1	104.97
NM_001042533.2	MINA	MINA_15834	m2_negative	rep1	104.988
NM_001006944.1	RPS6KA4	RPS6KA4_16174	input	rep2	105.015
NM_138609.2	H2AFY	H2AFY_20012	m1_positive	rep1	105.043
NM_014034.2	ASF1A	ASF1A_18094	m2_positive	rep1	105.061
NM_001006944.1	RPS6KA4	RPS6KA4_16174	plasmid	rep1	105.076
NM_001006944.1	RPS6KA4	RPS6KA4_16174	plasmid	rep2	105.076
NM_001991.3	EZH1	EZH1_19710	m2_positive	rep2	105.214
NM_004241.2	JMJD1C	JMJD1C_21028	m2_positive	rep2	105.257
NM_004217.3	AURKB	AURKB_18286	plasmid	rep1	105.259
NM_004217.3	AURKB	AURKB_18286	plasmid	rep2	105.259
NM_001178055.1	PARP8	PARP8_22598	m2_positive	rep2	105.274
NM_005334.2	HCFC1	HCFC1_20078	m1_positive	rep2	105.344
NM_012330.3	KAT6B	KAT6B_22188	m1_negative	rep1	105.399
NM_001904.3	CTNNB1	CTNNB1_19334	m2_negative	rep1	105.4
NM_012117.2	CBX5	CBX5_18762	input	rep2	105.412
NM_014390.2	SND1	SND1_15458	m2_positive	rep2	105.455
NM_005066.2	SFPQ	SFPQ_24332	m2_positive	rep1	105.463
NM_021078.2	KAT2A	KAT2A_17070	m2_negative	rep1	105.492
NM_016188.4	ACTL6B	ACTL6B_17742	m2_positive	rep1	105.497
NM_144584.2	HENMT1	HENMT1_20314	m1_negative	rep1	105.513
NM_004412.5	TRDMT1	TRDMT1_25830	m1_negative	rep1	105.519
NM_004360.3	CDH1	CDH1_15378	m2_positive	rep1	105.52
NM_001136505.1	CCDC79	CCDC79_18830	m2_negative	rep1	105.535
NM_175709.3	CBX7	CBX7_18798	input	rep1	105.538
NM_001273.2	CHD4	CHD4_19110	input	rep2	105.575
NM_005933.3	MLL	MLL_16846	input	rep2	105.596
NM_003113.3	SP100	SP100_24974	m1_positive	rep2	105.616
NM_031923.2	TAF3	TAF3_14650	m1_positive	rep2	105.622
NM_003072.3	SMARCA4	SMARCA4_24610	m2_negative	rep2	105.631
NM_005746.2	NAMPT	NAMPT_26286	m1_negative	rep1	105.678
NM_006530.2	YEATS4	YEATS4_26158	m2_negative	rep1	105.691
NM_004755.2	RPS6KA5	RPS6KA5_14082	input	rep2	105.698
NM_006109.3	PRMT5	PRMT5_23366	m1_negative	rep1	105.775
NM_003922.3	HERC1	HERC1_26610	m1_negative	rep1	105.778
NM_030794.2	TDRD3	TDRD3_15662	m1_negative	rep1	105.823
NM_013393.1	FTSJ2	FTSJ2_19846	plasmid	rep1	105.837
NM_013393.1	FTSJ2	FTSJ2_19846	plasmid	rep2	105.837
NM_152998.2	EZH2	EZH2_26862	m2_negative	rep2	105.888
NM_020746.4	MAVS	MAVS_21518	m1_positive	rep1	105.889
NM_005997.2	VPS72	VPS72_14278	m2_negative	rep1	105.912
NM_000314.4	PTEN	PTEN_16486	m2_negative	rep2	105.936
NM_153042.3	KDM1B	KDM1B_21186	m1_positive	rep2	105.945
NM_012238.4	SIRT1	SIRT1_14796	m1_positive	rep1	106.022
NM_152998.2	EZH2	EZH2_26860	m2_negative	rep1	106.029
NM_001017363.1	ARID3C	ARID3C_18014	m1_negative	rep1	106.042
NM_024831.6	TGS1	TGS1_15590	m2_positive	rep2	106.045
NM_006530.2	YEATS4	YEATS4_14406	m2_positive	rep1	106.051
NM_001429.3	EP300	EP300_19642	m2_positive	rep1	106.071
NM_182931.2	MLL5	MLL5_16524	m1_positive	rep1	106.074
NM_002908.2	REL	REL_15406	m2_negative	rep2	106.09
NM_005871.3	SMNDC1	SMNDC1_24767	m1_negative	rep1	106.096
NM_021620.3	PRDM13	PRDM13_14732	m2_positive	rep2	106.106
NM_002165.3	ID1	ID1_20686	m2_negative	rep1	106.118
NM_001136239.1	PRDM6	PRDM6_23234	m1_positive	rep2	106.169
NM_001146705.1	KDM5D	KDM5D_21314	input	rep1	106.174
NM_003146.2	SSRP1	SSRP1_25078	m2_negative	rep2	106.175
NM_152998.2	EZH2	EZH2_26874	input	rep2	106.283
NM_003922.3	HERC1	HERC1_26604	plasmid	rep1	106.311
NM_003922.3	HERC1	HERC1_26604	plasmid	rep2	106.311
NM_001328.2	CTBP1	CTBP1_14466	m2_positive	rep1	106.391
NM_020746.4	MAVS	MAVS_21518	m2_negative	rep1	106.391
NM_003789.3	TRADD	TRADD_25806	m1_negative	rep1	106.473
NM_003852.3	TRIM24	TRIM24_25836	m2_negative	rep2	106.504
NM_005663.4	WHSC2	WHSC2_26120	m2_positive	rep2	106.507
NM_001184993.1	RNF17	RNF17_23774	input	rep2	106.558
NM_032199.2	ARID5B	ARID5B_18078	m1_negative	rep1	106.572
NM_005788.3	PRMT3	PRMT3_23348	m1_positive	rep1	106.581
NM_006981.3	NR4A3	NR4A3_22470	m2_negative	rep1	106.581
NM_005903.5	SMAD5	SMAD5_24526	m2_negative	rep1	106.586
NM_005762.2	TRIM28	TRIM28_25846	m1_positive	rep2	106.597
NM_014109.3	ATAD2	ATAD2_16398	m2_positive	rep2	106.601
NM_015906.3	TRIM33	TRIM33_25868	input	rep1	106.606
NM_003132.2	SRM	SRM_25066	input	rep2	106.683
NR_037947.1	NSUN2	NSUN2_22510	input	rep2	106.717
NM_005788.3	PRMT3	PRMT3_23346	m2_negative	rep1	106.732
NM_012406.3	PRDM4	PRDM4_23202	input	rep2	106.739
NM_003922.3	HERC1	HERC1_26606	m1_positive	rep2	106.741
NM_014712.1	SETD1A	SETD1A_24118	input	rep2	106.744
NM_001184.3	ATR	ATR_15370	m1_positive	rep2	106.746
NM_198795.1	TDRD1	TDRD1_25422	m1_positive	rep1	106.751
NM_001203258.1	MTA1	MTA1_14428	m2_negative	rep1	106.751
XR_017086.3	Luc	Luc_262002	plasmid	rep1	106.785
XR_017086.3	Luc	Luc_262002	plasmid	rep2	106.785
NM_020771.3	HACE1	HACE1_26510	m1_negative	rep1	106.802
NM_006904.6	PRKDC	PRKDC_26394	m1_positive	rep2	106.823
NM_005967.3	NAB2	NAB2_22214	plasmid	rep1	106.848
NM_005967.3	NAB2	NAB2_22214	plasmid	rep2	106.848
NM_004973.3	JARID2	JARID2_15770	m2_positive	rep1	106.864
NM_005243.3	EWSR1	EWSR1_19686	m1_negative	rep1	106.928
NM_001145104.1	SMAD3	SMAD3_24490	m2_negative	rep1	106.952
NM_007144.2	PCGF2	PCGF2_15164	m2_positive	rep2	106.98
NM_138609.2	H2AFY	H2AFY_20007	m2_positive	rep2	107.002
NM_017999.4	RNF31	RNF31_23818	m1_positive	rep2	107.019
NM_025209.2	EPC1	EPC1_15654	m1_positive	rep1	107.058
NM_024831.6	TGS1	TGS1_15590	m1_positive	rep1	107.117
NM_021140.2	KDM6A	KDM6A_21324	m2_positive	rep2	107.134
NM_024947.3	PHC3	PHC3_22714	input	rep2	107.163
NM_001040443.1	PHF11	PHF11_22758	m2_negative	rep1	107.205
NM_138402.4	SP140L	SP140L_25022	m1_negative	rep1	107.208
NM_177438.2	DICER1	DICER1_26444	m2_negative	rep1	107.258
NM_001145357.1	SIN3A	SIN3A_24366	plasmid	rep1	107.266
NM_001145357.1	SIN3A	SIN3A_24366	plasmid	rep2	107.266
NM_001202.3	BMP4	BMP4_15570	m2_positive	rep1	107.28
NM_013448.2	BAZ1A	BAZ1A_15246	input	rep2	107.293
NM_014663.2	KDM4A	KDM4A_14444	input	rep2	107.334
NM_012204.2	GTF3C4	GTF3C4_19998	m1_negative	rep1	107.354
NM_015559.2	SETBP1	SETBP1_24110	input	rep2	107.376
NM_018263.4	ASXL2	ASXL2_18170	m2_positive	rep2	107.381
NM_198040.2	PHC2	PHC2_22710	m2_negative	rep2	107.386
NM_032482.2	DOT1L	DOT1L_19526	input	rep1	107.392
NM_004242.3	HMGN3	HMGN3_20614	m2_positive	rep2	107.405
NM_013393.1	FTSJ2	FTSJ2_19846	m1_negative	rep1	107.418
NM_002105.2	H2AFX	H2AFX_20030	m2_negative	rep1	107.46
NM_001003931.2	PARP3	PARP3_22575	m1_positive	rep1	107.494
NM_005224.2	ARID3A	ARID3A_16830	m2_negative	rep2	107.495
NM_005746.2	NAMPT	NAMPT_26285	m2_negative	rep2	107.518
NM_024602.5	HECTD3	HECTD3_26570	m1_negative	rep1	107.55
NM_003884.4	KAT2B	KAT2B_14766	plasmid	rep1	107.559
NM_003884.4	KAT2B	KAT2B_14766	plasmid	rep2	107.559
NM_013393.1	FTSJ2	FTSJ2_19846	m1_positive	rep1	107.613
NM_001198.3	PRDM1	PRDM1_23070	m2_negative	rep2	107.629
NM_021078.2	KAT2A	KAT2A_17070	m1_positive	rep2	107.643
NM_001130173.1	MYB	MYB_22022	input	rep2	107.726
NM_001200.2	BMP2	BMP2_18402	m2_negative	rep1	107.735
NM_001256536.1	PRMT8	PRMT8_23406	input	rep1	107.766
NM_001184993.1	RNF17	RNF17_23774	m2_positive	rep1	107.773
NM_020901.2	PHRF1	PHRF1_17348	m1_positive	rep2	107.792
NM_017635.3	SUV420H1	SUV420H1_25210	m1_negative	rep1	107.805
NM_014034.2	ASF1A	ASF1A_18086	m1_positive	rep1	107.819
NM_003925.1	MBD4	MBD4_21630	m1_positive	rep1	107.841
NM_004612.2	TGFBR1	TGFBR1_25678	m1_negative	rep1	107.849
NM_003341.4	UBE2E1	UBE2E1_25954	m2_negative	rep1	107.852
NM_005392.3	PHF2	PHF2_22862	plasmid	rep1	107.866
NM_005392.3	PHF2	PHF2_22862	plasmid	rep2	107.866
NM_001242902.1	AKAP1	AKAP1_17926	m2_negative	rep1	107.909
NM_002051.2	GATA3	GATA3_16966	m1_positive	rep2	107.91
NM_139266.2	STAT1	STAT1_25098	m1_negative	rep1	107.937
NM_021619.2	PRDM12	PRDM12_23116	m2_positive	rep1	107.973
NM_001242805.1	BRDT	BRDT_18590	m1_negative	rep1	107.996
NM_020746.4	MAVS	MAVS_21518	m2_positive	rep2	107.996
NM_001085487.2	MYSM1	MYSM1_16718	m1_positive	rep1	108.055
NM_013282.3	UHRF1	UHRF1_26002	m1_negative	rep1	108.07
NM_001003694.1	BRPF1	BRPF1_18630	m2_negative	rep2	108.076
NM_005334.2	HCFC1	HCFC1_20078	input	rep1	108.083
NM_022899.4	ACTR8	ACTR8_17790	m1_negative	rep1	108.086
NM_018699.2	PRDM5	PRDM5_23218	input	rep2	108.112
NM_024773.2	KDM8	KDM8_21062	m2_positive	rep1	108.127
NM_020920.3	CHD8	CHD8_19170	m1_positive	rep2	108.137
NM_005441.2	CHAF1B	CHAF1B_15687	m2_negative	rep2	108.137
NM_007121.5	NR1H2	NR1H2_22406	plasmid	rep1	108.18
NM_007121.5	NR1H2	NR1H2_22406	plasmid	rep2	108.18
NM_015001.2	SPEN	SPEN_25030	m2_negative	rep1	108.212
NM_198795.1	TDRD1	TDRD1_25422	input	rep2	108.219
NM_003069.3	SMARCA1	SMARCA1_24582	m1_positive	rep1	108.241
NM_004973.3	JARID2	JARID2_20998	m2_positive	rep1	108.255
NM_199141.1	CARM1	CARM1_18722	m2_negative	rep1	108.259
NM_004154.3	P2RY6	P2RY6_22534	m1_negative	rep1	108.269
NM_005762.2	TRIM28	TRIM28_25846	m2_negative	rep1	108.301
NM_006530.2	YEATS4	YEATS4_14406	m1_negative	rep1	108.331
NM_020920.3	CHD8	CHD8_19170	m1_positive	rep1	108.341
NM_012074.3	DPF3	DPF3_19558	m2_positive	rep2	108.39
NM_018263.4	ASXL2	ASXL2_18170	plasmid	rep1	108.436
NM_018263.4	ASXL2	ASXL2_18170	plasmid	rep2	108.436
NM_031923.2	TAF3	TAF3_14650	m2_positive	rep1	108.463
NM_013369.3	DNMT3L	DNMT3L_19502	input	rep2	108.506
NM_021619.2	PRDM12	PRDM12_23116	m2_positive	rep2	108.587
NR_026590.1	CDYL	CDYL_18918	m2_positive	rep2	108.619
NM_003068.4	SNAI2	SNAI2_24894	m2_negative	rep1	108.69
NM_005663.4	WHSC2	WHSC2_26118	m2_negative	rep2	108.71
NM_001135155.1	DPF1	DPF1_19530	m2_positive	rep1	108.729
NM_139276.2	STAT3	STAT3_15004	m1_negative	rep1	108.737
NM_017635.3	SUV420H1	SUV420H1_25222	plasmid	rep1	108.789
NM_017635.3	SUV420H1	SUV420H1_25222	plasmid	rep2	108.789
NM_003797.3	EED	EED_16934	m1_negative	rep1	108.841
NM_025133.4	FBXO11	FBXO11_19724	m1_positive	rep2	108.88
NM_012238.4	SIRT1	SIRT1_24380	m2_negative	rep1	108.89
NM_004329.2	BMPR1A	BMPR1A_18422	m1_positive	rep1	108.922
NM_182641.3	BPTF	BPTF_14666	m2_positive	rep2	108.973
NM_021975.3	RELA	RELA_14498	m2_positive	rep2	109.021
NM_030625.2	TET1	TET1_25604	m1_positive	rep1	109.034
NM_001105.4	ACVR1	ACVR1_14018	input	rep1	109.086
NM_138609.2	H2AFY	H2AFY_20015	m2_positive	rep2	109.125
NM_007371.3	BRD3	BRD3_18510	input	rep2	109.139
NM_001080432.2	FTO	FTO_19838	m2_positive	rep1	109.146
NM_001136239.1	PRDM6	PRDM6_23234	m2_positive	rep1	109.202
NR_024549.1	DMTF1	DMTF1_19422	plasmid	rep1	109.225
NR_024549.1	DMTF1	DMTF1_19422	plasmid	rep2	109.225
NM_003298.3	NR2C2	NR2C2_16782	m2_negative	rep1	109.239
NM_030665.3	RAI1	RAI1_23550	m1_positive	rep2	109.24
NM_030794.2	TDRD3	TDRD3_15662	input	rep2	109.273
NM_005788.3	PRMT3	PRMT3_23346	m1_negative	rep1	109.304
NM_006037.3	HDAC4	HDAC4_20158	m1_negative	rep1	109.347
NM_001001520.1	HDGFRP2	HDGFRP2_20262	m1_negative	rep1	109.391
NM_003922.3	HERC1	HERC1_26614	m2_positive	rep2	109.434
NM_138933.2	A1CF	A1CF_15598	m2_negative	rep1	109.441
NM_018263.4	ASXL2	ASXL2_18156	m1_negative	rep1	109.445
NM_003852.3	TRIM24	TRIM24_25836	plasmid	rep1	109.481
NM_003852.3	TRIM24	TRIM24_25836	plasmid	rep2	109.481
NM_001242902.1	AKAP1	AKAP1_17934	input	rep2	109.487
NM_031413.3	CECR2	CECR2_18990	m1_positive	rep2	109.56
NM_004154.3	P2RY6	P2RY6_14478	plasmid	rep1	109.579
NM_004154.3	P2RY6	P2RY6_14478	plasmid	rep2	109.579
NM_015906.3	TRIM33	TRIM33_25868	m1_positive	rep1	109.586
NM_004364.3	CEBPA	CEBPA_18958	m1_negative	rep1	109.591
NM_017635.3	SUV420H1	SUV420H1_25222	m2_negative	rep1	109.625
NM_018699.2	PRDM5	PRDM5_14540	m2_positive	rep2	109.632
NM_005251.2	FOXC2	FOXC2_14546	input	rep2	109.652
NM_012238.4	SIRT1	SIRT1_14796	m2_negative	rep2	109.775
NM_015052.3	HECW1	HECW1_17518	m1_negative	rep1	109.804
NM_001037540.1	SCML1	SCML1_14702	m2_negative	rep1	109.832
NM_145208.2	MBD3L1	MBD3L1_14686	input	rep2	109.859
NM_030625.2	TET1	TET1_25606	m2_negative	rep2	109.884
NM_014712.1	SETD1A	SETD1A_24118	m2_negative	rep1	109.886
NM_006037.3	HDAC4	HDAC4_20158	m1_positive	rep1	109.902
NM_138933.2	A1CF	A1CF_15598	m1_positive	rep2	109.979
NM_002051.2	GATA3	GATA3_16966	m2_negative	rep2	110.068
NM_012240.2	SIRT4	SIRT4_24420	m1_negative	rep1	110.077
NM_003743.4	NCOA1	NCOA1_14182	input	rep2	110.077
NM_005194.3	CEBPB	CEBPB_14358	m1_negative	rep1	110.188
NM_001003652.3	SMAD2	SMAD2_24484	m1_positive	rep2	110.215
NM_005788.3	PRMT3	PRMT3_23348	m1_positive	rep2	110.226
NM_018263.4	ASXL2	ASXL2_18170	m2_negative	rep1	110.236
NM_000536.3	RAG2	RAG2_23538	m2_positive	rep2	110.237
NM_015409.4	EP400	EP400_17570	m2_positive	rep2	110.24
NR_024549.1	DMTF1	DMTF1_19422	m1_positive	rep2	110.255
NM_001184993.1	RNF17	RNF17_23774	m2_negative	rep1	110.278
NM_002931.3	RING1	RING1_23714	m1_positive	rep1	110.328
NM_054034.2	FN1	FN1_19790	m2_positive	rep2	110.333
NM_032569.3	GLYR1	GLYR1_19948	input	rep1	110.38
NM_017635.3	SUV420H1	SUV420H1_25222	m1_positive	rep1	110.38
NR_026590.1	CDYL	CDYL_18918	m1_negative	rep1	110.437
NM_004360.3	CDH1	CDH1_15378	plasmid	rep1	110.444
NM_004360.3	CDH1	CDH1_15378	plasmid	rep2	110.444
NM_022491.2	SUDS3	SUDS3_16630	m1_positive	rep1	110.445
NM_005392.3	PHF2	PHF2_22862	m1_positive	rep2	110.456
NM_014712.1	SETD1A	SETD1A_24118	m1_positive	rep2	110.472
NM_001130173.1	MYB	MYB_22022	m2_negative	rep1	110.485
NM_016604.3	KDM3B	KDM3B_21220	m2_negative	rep2	110.488
NM_004241.2	JMJD1C	JMJD1C_21028	m1_positive	rep1	110.507
NM_001127228.1	CBX1	CBX1_18726	plasmid	rep1	110.508
NM_001127228.1	CBX1	CBX1_18726	plasmid	rep2	110.508
NM_024610.5	HSPBAP1	HSPBAP1_20661	m2_positive	rep1	110.588
NM_030632.1	ASXL3	ASXL3_18186	m2_positive	rep2	110.599
NM_006062.2	SMYD5	SMYD5_24866	m1_negative	rep1	110.62
NM_003073.3	SMARCB1	SMARCB1_17086	input	rep2	110.65
NR_040712.1	CHRAC1	CHRAC1_19194	m1_positive	rep1	110.655
NM_001199155.1	KAT7	KAT7_22162	m1_negative	rep1	110.676
NM_003797.3	EED	EED_19566	m2_positive	rep1	110.718
NR_037947.1	NSUN2	NSUN2_22502	m1_positive	rep2	110.742
NM_021078.2	KAT2A	KAT2A_17068	m1_negative	rep1	110.745
NM_001199155.1	KAT7	KAT7_22150	input	rep2	110.768
NM_000536.3	RAG2	RAG2_23538	m2_negative	rep1	110.773
NM_001008541.1	MXI1	MXI1_22002	m1_negative	rep1	110.829
NM_004426.2	PHC1	PHC1_17646	m2_negative	rep1	110.88
NM_138933.2	A1CF	A1CF_15598	input	rep2	110.886
NM_021620.3	PRDM13	PRDM13_14732	m1_positive	rep2	110.907
NR_038123.1	PSMA3	PSMA3_23444	m2_positive	rep2	110.921
NM_001184.3	ATR	ATR_15370	m1_positive	rep1	111.019
NM_001242902.1	AKAP1	AKAP1_17926	m1_positive	rep1	111.038
NM_004242.3	HMGN3	HMGN3_20614	m2_positive	rep1	111.052
NM_031488.4	L3MBTL2	L3MBTL2_21414	m2_negative	rep1	111.086
NM_001904.3	CTNNB1	CTNNB1_19334	m2_negative	rep2	111.086
NM_006339.2	HMG20B	HMG20B_14566	m1_positive	rep2	111.091
NM_020998.3	MST1	MST1_17422	m1_negative	rep1	111.114
NM_001145104.1	SMAD3	SMAD3_24490	m1_positive	rep2	111.133
NM_004364.3	CEBPA	CEBPA_18950	m2_negative	rep1	111.212
NM_175709.3	CBX7	CBX7_18798	m1_positive	rep1	111.259
NM_001145260.1	NCOA4	NCOA4_22262	m2_positive	rep1	111.265
NM_004412.5	TRDMT1	TRDMT1_25826	m2_positive	rep1	111.279
NR_037625.1	BRD2	BRD2_18502	m1_positive	rep2	111.291
NM_020901.2	PHRF1	PHRF1_23038	m1_negative	rep1	111.3
NM_001202.3	BMP4	BMP4_15570	m1_negative	rep1	111.334
NM_003922.3	HERC1	HERC1_26604	m2_negative	rep2	111.346
NM_001968.3	EIF4E	EIF4E_26428	input	rep2	111.432
NM_013369.3	DNMT3L	DNMT3L_19516	m2_negative	rep1	111.436
NM_000660.4	TGFB1	TGFB1_25662	m2_negative	rep1	111.437
NR_040712.1	CHRAC1	CHRAC1_19204	m1_negative	rep1	111.46
NM_001080432.2	FTO	FTO_19838	input	rep2	111.488
NM_003922.3	HERC1	HERC1_26604	input	rep2	111.514
NM_003797.3	EED	EED_19578	m2_positive	rep1	111.522
NM_001127228.1	CBX1	CBX1_18726	m2_positive	rep1	111.544
NM_022465.3	IKZF4	IKZF4_20750	plasmid	rep1	111.546
NM_022465.3	IKZF4	IKZF4_20750	plasmid	rep2	111.546
NM_001136505.1	CCDC79	CCDC79_18826	m1_negative	rep1	111.549
NM_016578.3	RSF1	RSF1_23934	m2_positive	rep1	111.573
NM_032482.2	DOT1L	DOT1L_19526	m1_positive	rep2	111.579
NM_014663.2	KDM4A	KDM4A_21234	m2_positive	rep2	111.591
NM_020327.3	ACVR1B	ACVR1B_17806	m2_negative	rep1	111.603
NM_020746.4	MAVS	MAVS_21518	input	rep2	111.603
NM_003799.1	RNMT	RNMT_23846	m2_positive	rep1	111.622
NM_014109.3	ATAD2	ATAD2_18190	input	rep1	111.639
NM_001809.3	CENPA	CENPA_19006	m1_positive	rep1	111.692
NM_030625.2	TET1	TET1_25606	m1_positive	rep2	111.724
NM_006044.2	HDAC6	HDAC6_17126	m1_negative	rep1	111.727
NM_003146.2	SSRP1	SSRP1_25078	m2_positive	rep1	111.739
NM_005997.2	VPS72	VPS72_14278	m2_positive	rep2	111.757
NM_018137.2	PRMT6	PRMT6_23374	m2_negative	rep1	111.829
NM_014109.3	ATAD2	ATAD2_18190	input	rep2	111.833
NM_005251.2	FOXC2	FOXC2_14546	plasmid	rep1	111.835
NM_005251.2	FOXC2	FOXC2_14546	plasmid	rep2	111.835
NM_001203.2	BMPR1B	BMPR1B_16238	m1_positive	rep2	111.845
NM_001991.3	EZH1	EZH1_19710	m2_negative	rep1	111.855
NM_182641.3	BPTF	BPTF_18470	m2_negative	rep2	111.876
NM_006534.3	NCOA3	NCOA3_22242	m1_negative	rep1	111.93
NM_001200.2	BMP2	BMP2_18402	m1_positive	rep1	112.003
NM_002105.2	H2AFX	H2AFX_20030	m2_negative	rep2	112.015
NM_014109.3	ATAD2	ATAD2_18190	m1_positive	rep1	112.072
NM_019592.5	RNF20	RNF20_23794	m1_negative	rep1	112.117
NM_004667.5	HERC2	HERC2_26622	m1_positive	rep1	112.122
NM_138609.2	H2AFY	H2AFY_20012	m1_positive	rep2	112.123
NR_037947.1	NSUN2	NSUN2_22510	input	rep1	112.143
NR_072975.1	CTCFL	CTCFL_19326	m2_negative	rep1	112.167
NM_020327.3	ACVR1B	ACVR1B_17806	plasmid	rep1	112.191
NM_020327.3	ACVR1B	ACVR1B_17806	plasmid	rep2	112.191
NM_177438.2	DICER1	DICER1_26444	m2_positive	rep1	112.194
NM_054034.2	FN1	FN1_19790	m2_negative	rep2	112.199
NM_024860.2	SETD6	SETD6_24206	m1_positive	rep2	112.253
NM_001167681.2	FLI1	FLI1_14270	m2_positive	rep1	112.29
NM_003927.4	MBD2	MBD2_21554	input	rep1	112.302
NM_007212.3	RNF2	RNF2_23738	m2_positive	rep1	112.306
NM_015866.4	PRDM2	PRDM2_23178	m2_negative	rep2	112.34
NM_001128128.2	ZEB1	ZEB1_17478	m1_positive	rep2	112.356
NM_001198719.1	RBBP7	RBBP7_23602	m2_positive	rep2	112.384
NM_001270.2	CHD1	CHD1_19068	input	rep2	112.39
NM_002524.4	NRAS	NRAS_26346	m2_positive	rep1	112.39
NM_014473.2	DIMT1	DIMT1_19396	m1_negative	rep1	112.428
NM_020746.4	MAVS	MAVS_21518	plasmid	rep1	112.434
NM_020746.4	MAVS	MAVS_21518	plasmid	rep2	112.434
NM_173849.2	GSC	GSC_19974	m2_negative	rep1	112.459
NM_001379.2	DNMT1	DNMT1_19462	m1_negative	rep1	112.474
NM_005903.5	SMAD5	SMAD5_24518	m2_positive	rep2	112.477
NM_001080432.2	FTO	FTO_19838	m1_positive	rep1	112.508
NM_199454.2	PRDM16	PRDM16_23174	m2_positive	rep2	112.513
NM_001203258.1	MTA1	MTA1_14430	m2_positive	rep1	112.533
NM_198040.2	PHC2	PHC2_22710	m1_negative	rep1	112.54
NM_024947.3	PHC3	PHC3_22716	m2_negative	rep1	112.566
NM_016587.3	CBX3	CBX3_15138	m1_positive	rep2	112.58
NM_003482.3	MLL2	MLL2_21802	m1_positive	rep2	112.607
NM_017984.4	ZCWPW1	ZCWPW1_26174	plasmid	rep1	112.62
NM_017984.4	ZCWPW1	ZCWPW1_26174	plasmid	rep2	112.62
NM_001037540.1	SCML1	SCML1_24054	m1_negative	rep1	112.621
NM_006037.3	HDAC4	HDAC4_20158	input	rep1	112.646
NM_001145260.1	NCOA4	NCOA4_22262	m2_negative	rep2	112.658
NM_003821.5	RIPK2	RIPK2_14322	input	rep1	112.667
NM_004154.3	P2RY6	P2RY6_14478	m2_negative	rep1	112.674
NM_001429.3	EP300	EP300_19642	m2_positive	rep2	112.699
NM_002451.3	MTAP	MTAP_14282	m2_negative	rep1	112.706
NM_005342.2	HMGB3	HMGB3_20542	m1_negative	rep1	112.711
NM_032352.3	BRMS1L	BRMS1L_18606	m2_positive	rep1	112.725
NM_007144.2	PCGF2	PCGF2_15164	plasmid	rep1	112.727
NM_007144.2	PCGF2	PCGF2_15164	plasmid	rep2	112.727
NM_015052.3	HECW1	HECW1_26574	plasmid	rep1	112.729
NM_015052.3	HECW1	HECW1_26574	plasmid	rep2	112.729
NM_003884.4	KAT2B	KAT2B_14766	input	rep2	112.76
NM_000660.4	TGFB1	TGFB1_25676	m2_negative	rep2	112.762
NM_058243.2	BRD4	BRD4_18534	m1_positive	rep2	112.767
NM_007250.4	KLF8	KLF8_21374	m1_negative	rep1	112.839
NM_014703.2	VPRBP	VPRBP_15996	m1_positive	rep2	112.903
NM_024831.6	TGS1	TGS1_15590	m2_positive	rep1	112.915
NM_015048.1	SETD1B	SETD1B_24134	m2_positive	rep2	112.985
NM_015153.2	PHF3	PHF3_14818	m2_negative	rep2	113.059
NM_021975.3	RELA	RELA_17204	m1_positive	rep1	113.069
NM_006037.3	HDAC4	HDAC4_20158	m2_positive	rep1	113.086
NM_004360.3	CDH1	CDH1_15378	m2_negative	rep1	113.124
NM_138364.2	PRMT10	PRMT10_16334	m2_positive	rep1	113.132
NM_000536.3	RAG2	RAG2_23538	input	rep2	113.136
NM_024860.2	SETD6	SETD6_24206	m2_negative	rep1	113.14
NM_198795.1	TDRD1	TDRD1_25422	m2_positive	rep2	113.234
NM_016587.3	CBX3	CBX3_15138	m2_positive	rep1	113.263
NM_015409.4	EP400	EP400_17570	m1_positive	rep1	113.29
NM_005762.2	TRIM28	TRIM28_25846	input	rep1	113.307
NM_006044.2	HDAC6	HDAC6_14246	m1_positive	rep2	113.332
NM_000937.4	POLR2A	POLR2A_15052	m2_negative	rep2	113.335
NM_003852.3	TRIM24	TRIM24_25836	m1_negative	rep1	113.375
NM_007250.4	KLF8	KLF8_21374	input	rep2	113.382
NM_181725.3	METTL2A	METTL2A_21758	plasmid	rep1	113.386
NM_181725.3	METTL2A	METTL2A_21758	plasmid	rep2	113.386
NM_003922.3	HERC1	HERC1_26604	m1_positive	rep2	113.406
NM_003922.3	HERC1	HERC1_26606	input	rep2	113.436
NM_003884.4	KAT2B	KAT2B_14766	m2_negative	rep1	113.496
NM_015409.4	EP400	EP400_17570	input	rep2	113.508
NM_001127228.1	CBX1	CBX1_18726	m2_negative	rep2	113.512
NM_015401.3	HDAC7	HDAC7_20190	input	rep2	113.518
NM_017984.4	ZCWPW1	ZCWPW1_26174	m1_positive	rep2	113.526
NM_003341.4	UBE2E1	UBE2E1_25950	m1_positive	rep1	113.531
NR_037947.1	NSUN2	NSUN2_22508	input	rep2	113.532
NM_005663.4	WHSC2	WHSC2_26120	m2_negative	rep2	113.537
NM_014712.1	SETD1A	SETD1A_24118	input	rep1	113.552
NM_138933.2	A1CF	A1CF_15598	m1_positive	rep1	113.554
NM_003079.4	SMARCE1	SMARCE1_16974	m2_positive	rep1	113.579
XR_017086.3	Luc	Luc_262002	input	rep2	113.637
NM_001203.2	BMPR1B	BMPR1B_16238	m2_positive	rep1	113.64
NM_003884.4	KAT2B	KAT2B_14766	m2_negative	rep2	113.653
NM_006540.2	NCOA2	NCOA2_14908	m2_negative	rep1	113.654
NM_001145260.1	NCOA4	NCOA4_22262	m1_negative	rep1	113.72
NM_005243.3	EWSR1	EWSR1_19698	m1_positive	rep1	113.76
NM_005903.5	SMAD5	SMAD5_24518	m1_positive	rep1	113.804
NM_001535.3	PRMT2	PRMT2_23326	m2_positive	rep1	113.857
NM_003074.3	SMARCC1	SMARCC1_24670	input	rep1	113.877
NM_004426.2	PHC1	PHC1_17646	plasmid	rep1	113.877
NM_004426.2	PHC1	PHC1_17646	plasmid	rep2	113.877
NM_001005920.2	JMJD8	JMJD8_17262	m2_positive	rep1	113.884
NM_007250.4	KLF8	KLF8_21374	m1_positive	rep1	113.906
NM_014314.3	DDX58	DDX58_19362	m1_positive	rep1	113.909
NM_006311.3	NCOR1	NCOR1_22330	m2_positive	rep1	113.913
NM_001083113.1	ZGPAT	ZGPAT_16694	m1_positive	rep1	113.919
NM_003146.2	SSRP1	SSRP1_25076	m2_positive	rep2	113.935
NM_003113.3	SP100	SP100_24974	m2_negative	rep2	113.944
NM_004364.3	CEBPA	CEBPA_18958	m1_positive	rep2	113.962
NM_001203258.1	MTA1	MTA1_14428	m1_positive	rep1	113.963
NM_004364.3	CEBPA	CEBPA_18954	m2_positive	rep1	113.969
NM_001079526.1	IKZF2	IKZF2_20730	m1_negative	rep1	113.974
NM_013393.1	FTSJ2	FTSJ2_19846	m2_positive	rep2	114.002
NM_003601.3	SMARCA5	SMARCA5_24621	m1_positive	rep2	114.018
NM_004412.5	TRDMT1	TRDMT1_25830	m2_positive	rep1	114.022
NM_005746.2	NAMPT	NAMPT_26285	input	rep1	114.023
NM_182931.2	MLL5	MLL5_16526	m2_negative	rep1	114.034
NM_005663.4	WHSC2	WHSC2_26120	m2_positive	rep1	114.042
NM_130839.2	UBE3A	UBE3A_26766	m2_positive	rep2	114.12
NM_015559.2	SETBP1	SETBP1_24110	m2_negative	rep1	114.121
NM_014034.2	ASF1A	ASF1A_18090	m2_positive	rep1	114.149
NM_001199155.1	KAT7	KAT7_22158	m1_negative	rep1	114.165
NM_014663.2	KDM4A	KDM4A_16638	m1_negative	rep1	114.182
NM_153042.3	KDM1B	KDM1B_21186	m1_negative	rep1	114.238
NM_002524.4	NRAS	NRAS_26350	input	rep1	114.249
NM_031923.2	TAF3	TAF3_25318	m1_negative	rep1	114.293
NM_004241.2	JMJD1C	JMJD1C_21028	m2_positive	rep1	114.316
NM_014159.6	SETD2	SETD2_24142	m1_negative	rep1	114.326
NM_001127228.1	CBX1	CBX1_18724	m1_negative	rep1	114.392
NM_003482.3	MLL2	MLL2_21810	m2_positive	rep1	114.403
NM_139135.2	ARID1A	ARID1A_17950	m2_negative	rep1	114.461
NM_003489.3	NRIP1	NRIP1_22478	m1_negative	rep1	114.479
NM_020395.3	INTS12	INTS12_20902	m2_positive	rep2	114.515
NM_014727.1	MLL4	MLL4_21838	input	rep2	114.516
NM_020998.3	MST1	MST1_21926	m1_negative	rep1	114.544
NM_003741.2	CHRD	CHRD_15566	m1_negative	rep1	114.544
NM_015052.3	HECW1	HECW1_17518	m2_positive	rep1	114.545
NM_002908.2	REL	REL_15404	m2_positive	rep1	114.584
NM_057179.2	TWIST2	TWIST2_25926	m1_negative	rep1	114.599
NM_017984.4	ZCWPW1	ZCWPW1_26174	m2_positive	rep1	114.618
NM_015167.2	JMJD6	JMJD6_15614	input	rep1	114.638
NM_001127217.2	SMAD9	SMAD9_24574	m2_negative	rep2	114.64
NM_001105.4	ACVR1	ACVR1_14018	m2_positive	rep1	114.675
NM_018137.2	PRMT6	PRMT6_23374	input	rep2	114.675
NM_001564.2	ING2	ING2_20774	m1_negative	rep1	114.678
NM_013369.3	DNMT3L	DNMT3L_19502	input	rep1	114.694
NM_021078.2	KAT2A	KAT2A_21122	m1_positive	rep1	114.704
NM_001184993.1	RNF17	RNF17_23774	m1_positive	rep1	114.722
NM_001005271.2	CHD3	CHD3_19106	m2_positive	rep2	114.722
NM_001203258.1	MTA1	MTA1_21946	m1_positive	rep1	114.729
NM_003601.3	SMARCA5	SMARCA5_24620	m2_negative	rep1	114.758
NR_027862.1	HAT1	HAT1_20070	m2_positive	rep1	114.768
NM_173464.3	L3MBTL4	L3MBTL4_21446	m2_negative	rep1	114.802
NM_152998.2	EZH2	EZH2_26878	m1_negative	rep1	114.815
NM_014712.1	SETD1A	SETD1A_16142	m1_positive	rep1	114.841
NM_005663.4	WHSC2	WHSC2_26122	m1_positive	rep1	114.926
NR_024549.1	DMTF1	DMTF1_17486	m1_positive	rep1	114.934
NR_026590.1	CDYL	CDYL_18918	m2_positive	rep1	114.948
NM_022739.3	SMURF2	SMURF2_16950	m2_positive	rep1	114.972
NM_001101802.1	PHF21A	PHF21A_22916	input	rep1	114.979
NM_006268.4	DPF2	DPF2_14506	m2_positive	rep1	115.072
NR_027862.1	HAT1	HAT1_20070	m2_positive	rep2	115.094
NR_072975.1	CTCFL	CTCFL_19326	m1_positive	rep1	115.097
NM_001037540.1	SCML1	SCML1_14702	m1_positive	rep2	115.106
NM_013448.2	BAZ1A	BAZ1A_15242	input	rep1	115.148
NM_001006944.1	RPS6KA4	RPS6KA4_16174	m1_positive	rep2	115.159
NM_017999.4	RNF31	RNF31_23814	m1_negative	rep1	115.164
NM_002648.3	PIM1	PIM1_23050	m1_negative	rep1	115.217
NM_006037.3	HDAC4	HDAC4_20154	m1_negative	rep1	115.26
NM_006981.3	NR4A3	NR4A3_22470	m1_positive	rep2	115.263
NM_012237.3	SIRT2	SIRT2_24382	m2_positive	rep1	115.294
NM_014663.2	KDM4A	KDM4A_21230	m2_positive	rep2	115.344
NM_005903.5	SMAD5	SMAD5_24526	m2_negative	rep2	115.377
NM_001270.2	CHD1	CHD1_15058	m1_positive	rep1	115.404
NM_015409.4	EP400	EP400_17570	m2_negative	rep1	115.405
NM_013369.3	DNMT3L	DNMT3L_19502	plasmid	rep1	115.41
NM_013369.3	DNMT3L	DNMT3L_19502	plasmid	rep2	115.41
NM_017934.5	PHIP	PHIP_23018	m2_positive	rep1	115.47
NR_037947.1	NSUN2	NSUN2_22506	m2_positive	rep1	115.505
NM_152998.2	EZH2	EZH2_26862	m2_negative	rep1	115.507
NM_015050.2	FTSJD2	FTSJD2_19874	m2_positive	rep2	115.533
NM_016073.3	HDGFRP3	HDGFRP3_20278	m2_negative	rep1	115.55
NM_003601.3	SMARCA5	SMARCA5_24621	m2_negative	rep2	115.556
NM_004426.2	PHC1	PHC1_17646	m2_negative	rep2	115.559
NM_012236.3	SCMH1	SCMH1_24044	m1_negative	rep1	115.596
NM_012240.2	SIRT4	SIRT4_14780	m1_positive	rep2	115.653
NM_144993.1	TET3	TET3_16838	m1_positive	rep2	115.704
NM_182931.2	MLL5	MLL5_16526	m1_positive	rep1	115.705
NM_006981.3	NR4A3	NR4A3_14894	m1_positive	rep1	115.709
NM_005342.2	HMGB3	HMGB3_14759	m1_negative	rep1	115.755
NM_020901.2	PHRF1	PHRF1_17348	m1_positive	rep1	115.769
NR_033435.1	PHF14	PHF14_22798	m2_negative	rep2	115.825
NM_024504.3	PRDM14	PRDM14_14764	plasmid	rep1	115.84
NM_024504.3	PRDM14	PRDM14_14764	plasmid	rep2	115.84
NR_072975.1	CTCFL	CTCFL_19324	m1_positive	rep2	115.856
NM_001203258.1	MTA1	MTA1_14428	input	rep2	115.866
NM_002024.5	FMR1	FMR1_19759	input	rep1	115.869
NM_014818.1	TRIM66	TRIM66_16766	input	rep1	115.905
NM_012237.3	SIRT2	SIRT2_24390	m2_positive	rep2	115.928
NM_054034.2	FN1	FN1_19788	m1_positive	rep2	115.928
NM_005788.3	PRMT3	PRMT3_23346	input	rep2	115.944
NM_006530.2	YEATS4	YEATS4_26158	m2_negative	rep2	115.969
NM_003074.3	SMARCC1	SMARCC1_24670	input	rep2	115.981
NM_003072.3	SMARCA4	SMARCA4_16558	m2_positive	rep1	116.016
NM_015048.1	SETD1B	SETD1B_24134	input	rep2	116.073
NM_003132.2	SRM	SRM_25062	m2_positive	rep1	116.088
NM_014663.2	KDM4A	KDM4A_21230	plasmid	rep1	116.098
NM_014663.2	KDM4A	KDM4A_21230	plasmid	rep2	116.098
NM_000314.4	PTEN	PTEN_23450	m1_positive	rep1	116.136
NM_005788.3	PRMT3	PRMT3_23346	m2_positive	rep2	116.144
NM_013448.2	BAZ1A	BAZ1A_15246	m2_negative	rep1	116.169
NM_001136139.2	TCF3	TCF3_25387	m1_positive	rep2	116.185
NM_001040443.1	PHF11	PHF11_22758	m2_negative	rep2	116.318
NM_032329.4	ING5	ING5_14950	m1_positive	rep2	116.357
NM_004898.3	CLOCK	CLOCK_14790	m2_positive	rep2	116.372
NM_138933.2	A1CF	A1CF_15598	m2_positive	rep1	116.425
NM_003922.3	HERC1	HERC1_26604	m1_positive	rep1	116.448
NM_018137.2	PRMT6	PRMT6_15254	input	rep1	116.467
NM_181672.2	OGT	OGT_22518	m2_positive	rep1	116.471
NM_001077261.3	NCOR2	NCOR2_22334	m2_negative	rep1	116.475
NM_020746.4	MAVS	MAVS_16870	m2_positive	rep2	116.482
NM_005788.3	PRMT3	PRMT3_23346	m2_negative	rep2	116.537
NM_013369.3	DNMT3L	DNMT3L_19516	m1_positive	rep2	116.555
NM_014703.2	VPRBP	VPRBP_26486	m1_negative	rep1	116.601
NM_003072.3	SMARCA4	SMARCA4_24606	m1_negative	rep1	116.636
NM_014703.2	VPRBP	VPRBP_15996	input	rep2	116.654
NM_031923.2	TAF3	TAF3_14650	m2_positive	rep2	116.673
NM_001101802.1	PHF21A	PHF21A_22906	m1_negative	rep1	116.717
NR_072975.1	CTCFL	CTCFL_19326	m2_negative	rep2	116.777
NM_001146705.1	KDM5D	KDM5D_21318	m1_negative	rep1	116.796
NM_004412.5	TRDMT1	TRDMT1_15276	m2_positive	rep2	116.915
NM_017984.4	ZCWPW1	ZCWPW1_26174	input	rep1	116.94
NM_005746.2	NAMPT	NAMPT_26285	m1_positive	rep2	116.949
NM_001328.2	CTBP1	CTBP1_14466	m2_negative	rep1	116.999
NM_003812.2	ADAM23	ADAM23_17852	m1_positive	rep2	117.043
NM_001198719.1	RBBP7	RBBP7_23602	input	rep2	117.046
NM_003925.1	MBD4	MBD4_21630	input	rep1	117.111
NM_014314.3	DDX58	DDX58_16522	m2_negative	rep2	117.139
NM_000660.4	TGFB1	TGFB1_25676	m2_negative	rep1	117.152
NM_152998.2	EZH2	EZH2_26874	m2_negative	rep2	117.153
NM_015052.3	HECW1	HECW1_26574	m1_positive	rep2	117.165
NM_002105.2	H2AFX	H2AFX_20030	input	rep2	117.246
NM_032329.4	ING5	ING5_14950	m1_negative	rep1	117.256
NM_031923.2	TAF3	TAF3_14650	input	rep1	117.295
NM_181725.3	METTL2A	METTL2A_21758	m2_positive	rep2	117.328
NM_001101802.1	PHF21A	PHF21A_22918	m1_negative	rep1	117.397
NM_001005271.2	CHD3	CHD3_19094	m1_positive	rep2	117.404
NM_014109.3	ATAD2	ATAD2_18190	m1_positive	rep2	117.458
NM_001145260.1	NCOA4	NCOA4_22262	plasmid	rep1	117.484
NM_001145260.1	NCOA4	NCOA4_22262	plasmid	rep2	117.484
NM_003072.3	SMARCA4	SMARCA4_24610	m2_positive	rep1	117.5
NM_015153.2	PHF3	PHF3_14818	input	rep1	117.515
NM_013342.3	TFPT	TFPT_25646	m1_negative	rep1	117.558
NM_001273.2	CHD4	CHD4_19110	plasmid	rep1	117.588
NM_001273.2	CHD4	CHD4_19110	plasmid	rep2	117.588
NM_015906.3	TRIM33	TRIM33_25866	m2_positive	rep2	117.67
NM_007144.2	PCGF2	PCGF2_22636	m1_negative	rep1	117.722
NM_001042533.2	MINA	MINA_15834	m1_negative	rep1	117.731
NM_173618.1	INO80E	INO80E_16380	m2_negative	rep2	117.76
NM_001178055.1	PARP8	PARP8_15526	m2_positive	rep1	117.801
NM_001040443.1	PHF11	PHF11_22758	input	rep2	117.802
NR_024022.1	SETMAR	SETMAR_24282	m1_negative	rep1	117.829
NM_003852.3	TRIM24	TRIM24_25836	input	rep2	117.832
NM_003298.3	NR2C2	NR2C2_16782	m2_negative	rep2	117.856
NM_006534.3	NCOA3	NCOA3_22250	m1_negative	rep1	117.857
NM_022874.2	SMN1	SMN1_24748	m2_positive	rep1	117.902
NM_003146.2	SSRP1	SSRP1_25078	m1_positive	rep2	117.905
NM_004360.3	CDH1	CDH1_15378	m2_positive	rep2	117.917
NM_198400.2	NEDD4	NEDD4_26726	m2_negative	rep1	117.936
NM_007121.5	NR1H2	NR1H2_22406	m2_negative	rep1	117.951
NM_006534.3	NCOA3	NCOA3_22250	m1_positive	rep1	117.951
NM_003482.3	MLL2	MLL2_21802	m2_negative	rep2	117.96
NM_001001520.1	HDGFRP2	HDGFRP2_20266	m1_positive	rep2	117.975
NM_006437.3	PARP4	PARP4_22590	m2_negative	rep1	117.984
NM_001136239.1	PRDM6	PRDM6_23234	m2_negative	rep1	117.998
NM_018196.3	TMLHE	TMLHE_25726	m2_negative	rep1	118.005
NM_012074.3	DPF3	DPF3_19558	m2_positive	rep1	118.026
NM_003797.3	EED	EED_19578	m2_negative	rep1	118.089
NM_001202.3	BMP4	BMP4_15570	m1_positive	rep1	118.131
NM_005903.5	SMAD5	SMAD5_24526	m1_negative	rep1	118.134
NM_001085487.2	MYSM1	MYSM1_16718	input	rep1	118.173
NM_139266.2	STAT1	STAT1_25098	m2_positive	rep1	118.18
NM_005937.3	MLLT6	MLLT6_21874	input	rep2	118.2
NM_003797.3	EED	EED_19566	m2_negative	rep2	118.2
NM_133325.2	PHF10	PHF10_22734	m2_negative	rep1	118.249
NM_004329.2	BMPR1A	BMPR1A_18422	m1_negative	rep1	118.256
NM_031407.5	HUWE1	HUWE1_17190	m1_negative	rep1	118.263
NM_001005271.2	CHD3	CHD3_19094	m2_positive	rep2	118.264
NM_003073.3	SMARCB1	SMARCB1_17086	plasmid	rep1	118.294
NM_003073.3	SMARCB1	SMARCB1_17086	plasmid	rep2	118.294
NM_001146705.1	KDM5D	KDM5D_21318	m1_positive	rep1	118.298
NM_153046.2	TDRD9	TDRD9_15478	m2_negative	rep2	118.327
NM_031413.3	CECR2	CECR2_18990	m2_negative	rep2	118.385
NM_139135.2	ARID1A	ARID1A_17954	m2_positive	rep1	118.387
NM_022874.2	SMN1	SMN1_24748	m2_negative	rep2	118.4
NM_032701.3	SUV420H2	SUV420H2_16006	input	rep1	118.447
NM_173618.1	INO80E	INO80E_16380	m1_negative	rep1	118.457
NM_000660.4	TGFB1	TGFB1_14126	m2_positive	rep1	118.508
NM_001991.3	EZH1	EZH1_19710	m1_positive	rep2	118.524
NM_004329.2	BMPR1A	BMPR1A_18422	input	rep1	118.545
NM_001809.3	CENPA	CENPA_19014	m2_negative	rep1	118.556
NM_006339.2	HMG20B	HMG20B_14566	m2_positive	rep1	118.566
NM_001429.3	EP300	EP300_19642	m2_negative	rep1	118.575
NM_030632.1	ASXL3	ASXL3_18186	input	rep2	118.592
NM_006534.3	NCOA3	NCOA3_22250	input	rep2	118.598
NM_017824.4	MARCH5	MARCH5_17678	m1_positive	rep1	118.604
NM_004241.2	JMJD1C	JMJD1C_21028	m2_negative	rep1	118.641
NM_007250.4	KLF8	KLF8_21374	m2_negative	rep1	118.653
NM_001203.2	BMPR1B	BMPR1B_16238	m2_positive	rep2	118.661
NM_001200.2	BMP2	BMP2_18402	plasmid	rep1	118.699
NM_001200.2	BMP2	BMP2_18402	plasmid	rep2	118.699
NM_005450.4	NOG	NOG_22394	m2_positive	rep2	118.765
NM_001101802.1	PHF21A	PHF21A_22916	m1_negative	rep1	118.805
NM_032482.2	DOT1L	DOT1L_19518	m1_positive	rep2	118.806
NM_181708.2	BCDIN3D	BCDIN3D_18358	m2_positive	rep1	118.844
NM_001273.2	CHD4	CHD4_19110	input	rep1	118.87
NM_001101802.1	PHF21A	PHF21A_22916	input	rep2	118.875
NM_000937.4	POLR2A	POLR2A_15052	m2_positive	rep1	118.881
NM_003151.3	STAT4	STAT4_25122	m1_negative	rep1	118.894
NM_004242.3	HMGN3	HMGN3_20614	input	rep1	118.902
NM_031407.5	HUWE1	HUWE1_26702	m1_positive	rep1	118.919
NM_005320.2	HIST1H1D	HIST1H1D_15746	m2_negative	rep1	118.921
NM_002524.4	NRAS	NRAS_26346	m2_negative	rep2	118.949
NM_003927.4	MBD2	MBD2_21554	m1_negative	rep1	118.966
NM_015906.3	TRIM33	TRIM33_15158	input	rep2	118.971
NM_001244580.1	TRRAP	TRRAP_25898	input	rep1	118.981
NM_138609.2	H2AFY	H2AFY_20015	m1_positive	rep1	118.994
NM_016073.3	HDGFRP3	HDGFRP3_20278	m2_negative	rep2	119
NM_005612.4	REST	REST_14518	input	rep1	119.013
NM_014034.2	ASF1A	ASF1A_18086	m2_negative	rep2	119.077
NM_021140.2	KDM6A	KDM6A_17350	m1_negative	rep1	119.08
NM_025134.4	CHD9	CHD9_19186	m2_positive	rep1	119.084
NM_006981.3	NR4A3	NR4A3_22470	m2_positive	rep2	119.088
NM_001203258.1	MTA1	MTA1_14428	m2_negative	rep2	119.101
NR_072975.1	CTCFL	CTCFL_19326	m1_negative	rep1	119.103
NM_003601.3	SMARCA5	SMARCA5_24626	plasmid	rep1	119.107
NM_003601.3	SMARCA5	SMARCA5_24626	plasmid	rep2	119.107
NM_016018.4	PHF20L1	PHF20L1_15902	m2_positive	rep2	119.203
NM_005967.3	NAB2	NAB2_22214	input	rep1	119.234
NM_015048.1	SETD1B	SETD1B_16734	m1_negative	rep1	119.251
NM_199454.2	PRDM16	PRDM16_23174	plasmid	rep1	119.26
NM_199454.2	PRDM16	PRDM16_23174	plasmid	rep2	119.26
NM_005243.3	EWSR1	EWSR1_19694	m1_positive	rep2	119.295
NM_001135155.1	DPF1	DPF1_19534	plasmid	rep1	119.322
[truncated: 140,979 more rows]
