# Supplementary material for: Multidimensional pooled shRNA screens in human THP-1 cells identify candidate modulators of macrophage polarization
Source: PLoS One. 2017 Aug 24;12(8):e0183679. doi: 10.1371/journal.pone.0183679 (PMC5570424; doi:10.1371/journal.pone.0183679)
Supplement: S3 Table — (XLSX) [file pone.0183679.s006.xlsx]

## Sheet: v5
S5 Table. Overview of the top 10 hits in the different contrasts and modes.
	M1 suppressors			M2 mediators			M1 mediators			M2 suppressors
gene	M1+ vs M1-	M1+ vs input	M1+ vs M2+	M2+ vs M2-	M2+ vs input	M2+ vs M1+	M1+ vs M1-	M1+ vs input	M1+ vs M2+	M2+ vs M2-	M2+ vs input	M2+ vs M1+
BRD4			+	+	+	+
EP300			+	+	+	+													•
HDAC5			+	+	+	+
KDM3B			+	+	+	+
TICAM1	+	+	+			+
CARM1									+	+	+	+
HCFC1									+	+	+	+
CDC42							+	+	+			+
RELA*							+	+	+			+
PSMA3				+	+		+	+
OGT			+	+		+
SMARCA4			+	+		+
NFKB2		+	+			+
BRD2*				+	+		+
RBBP7									+	+		+
REL*								+	+			+
MYC	+									+	+
TNFRSF1A		+								+	+
NSD1			+			+
ZEB2			+			+
SIN3A				+	+
ARID3A										+	+
ATF2									+			+
KAT6A									+			+
MYD88*									+			+
TDRD12									+			+
ATAT1	+
CTBP1	+
HACE1	+
NRAS	+
PWWP2A	+
SCML1	+
SMAD2	+
TDRD7	+
FOXC2		+
IDH1		+
JADE1		+
MTOR		+
PRDM4		+
RUNX1		+
SMARCB1		+
TRRAP				+
CHD4					+
STK4					+
TET2					+
CECR2							+
JMJD6							+
PRDM2							+
RUVBL2							+
SUV420H1							+
TAF1							+
ARID1A								+
HIST1H1E								+
JMJD1C								+
PRKDC								+
TRADD								+
UBE2E1								+
PRDM11										+
SETD3										+
SETD5										+
SMYD3										+
BAZ1B											+
EGFR											+
EIF4E											+
PHF1											+
PHF12											+
*known mediator of M1 polarization based on genetic data in mouse model
