# Supplementary material for: Multidimensional pooled shRNA screens in human THP-1 cells identify candidate modulators of macrophage polarization
Source: PLoS One. 2017 Aug 24;12(8):e0183679. doi: 10.1371/journal.pone.0183679 (PMC5570424; doi:10.1371/journal.pone.0183679)
Supplement: S4 Table — (XLSX) [file pone.0183679.s007.xlsx]

## Sheet: data
readout category	guide RNA	reporter	Ct values (rep1)	Ct values (rep2)	Ct values (rep3)	Ct average (rep1-3)	ΔCt_rep1 (Ct avg HGK - Ct avg sample)	ΔCt_rep2 (Ct avg HGK - Ct avg sample)	ΔCt_rep3 (Ct avg HGK - Ct avg sample)	2^(ΔCt_rep1)	2^(ΔCt_rep2)	2^(ΔCt_rep3)
tested gene	sgOGT_v1	IL13	37.004	39.576	39.453	38.6777	-20.5213	-21.3589	-21.2723	6.64482e-07	3.71818e-07	3.94821e-07
tested gene	sgOGT_v1	CSF2	38.482	37.915	39.158	38.5183	-20.3619	-19.6979	-20.9773	7.42074e-07	1.17582e-06	4.84399e-07
tested gene	sgOGT_v2	IL22	38.276	36.744	36.647	37.2223	-19.0659	-18.5269	-18.4663	1.82214e-06	2.64757e-06	2.76115e-06
tested gene	sgOGT_v1	TNFRSF11B	35	37.709	37.725	36.8113	-18.6549	-19.4919	-19.5443	2.42273e-06	1.35629e-06	1.30792e-06
tested gene	sgOGT_v1	IL22	34.818	38.382	37.173	36.791	-18.6346	-20.1649	-18.9923	2.45712e-06	8.50668e-07	1.91756e-06
tested gene	sgCTRL	IL17F	39.132	35	35	36.3773	-18.2209	-16.7829	-16.8193	3.27305e-06	8.86837e-06	8.64741e-06
tested gene	sgOGT_v2	CSF2	35	35	38.69	36.23	-18.0736	-16.7829	-20.5093	3.62497e-06	8.86837e-06	6.70017e-07
tested gene	sgCTRL	CCL8	35	35	38.447	36.149	-17.9926	-16.7829	-20.2663	3.83432e-06	8.86837e-06	7.92932e-07
tested gene	sgCTRL	IL22	37.415	36.28	34.732	36.1423	-17.9859	-18.0629	-16.5513	3.85207e-06	3.65196e-06	1.04127e-05
tested gene	sgOGT_v1	CXCL9	33.011	39.245	36.151	36.1357	-17.9793	-21.0279	-17.9703	3.86991e-06	4.67705e-07	3.89404e-06
tested gene	sgOGT_v2	THPO	38.292	35	35	36.0973	-17.9409	-16.7829	-16.8193	3.97412e-06	8.86837e-06	8.64741e-06
tested gene	sgCTRL	IL12B	38.193	35	35	36.0643	-17.9079	-16.7829	-16.8193	4.06607e-06	8.86837e-06	8.64741e-06
tested gene	sgOGT_v2	IL13	34.267	39.058	34.499	35.9413	-17.7849	-20.8409	-16.3183	4.42794e-06	5.32432e-07	1.22378e-05
tested gene	sgOGT_v2	CCL11	35	37.757	35	35.919	-17.7626	-19.5399	-16.8193	4.49702e-06	1.31191e-06	8.64741e-06
tested gene	sgCTRL	IL13	37.947	35	33.937	35.628	-17.4716	-16.7829	-15.7563	5.50205e-06	8.86837e-06	1.80668e-05
tested gene	sgOGT_v2	IL13	35	35	36.786	35.5953	-17.4389	-16.7829	-18.6053	5.62805e-06	8.86837e-06	2.50753e-06
tested gene	sgOGT_v2	CSF3	36.352	34.528	35.799	35.5597	-17.4033	-16.3109	-17.6183	5.76892e-06	1.23007e-05	4.97008e-06
tested gene	sgOGT_v1	MSTN	33.913	37.518	34.77	35.4003	-17.2439	-19.3009	-16.5893	6.44256e-06	1.54828e-06	1.0142e-05
tested gene	sgOGT_v2	IL4	35	35	36.139	35.3797	-17.2233	-16.7829	-17.9583	6.53552e-06	8.86837e-06	3.92657e-06
tested gene	sgOGT_v2	TNFRSF11B	37.234	35	33.598	35.2773	-17.1209	-16.7829	-15.4173	7.01593e-06	8.86837e-06	2.28523e-05
tested gene	sgCTRL	CCL11	35	35.774	35	35.258	-17.1016	-17.5569	-16.8193	7.11059e-06	5.18617e-06	8.64741e-06
tested gene	sgCTRL	CSF2	35	35	35	35	-16.8436	-16.7829	-16.8193	8.50298e-06	8.86837e-06	8.64741e-06
tested gene	sgCTRL	IFNA2	35	35	35	35	-16.8436	-16.7829	-16.8193	8.50298e-06	8.86837e-06	8.64741e-06
tested gene	sgCTRL	IFNG	35	35	35	35	-16.8436	-16.7829	-16.8193	8.50298e-06	8.86837e-06	8.64741e-06
tested gene	sgCTRL	IL17A	35	35	35	35	-16.8436	-16.7829	-16.8193	8.50298e-06	8.86837e-06	8.64741e-06
tested gene	sgCTRL	IL2	35	35	35	35	-16.8436	-16.7829	-16.8193	8.50298e-06	8.86837e-06	8.64741e-06
tested gene	sgCTRL	IL21	35	35	35	35	-16.8436	-16.7829	-16.8193	8.50298e-06	8.86837e-06	8.64741e-06
tested gene	sgCTRL	IL3	35	35	35	35	-16.8436	-16.7829	-16.8193	8.50298e-06	8.86837e-06	8.64741e-06
tested gene	sgCTRL	IL4	35	35	35	35	-16.8436	-16.7829	-16.8193	8.50298e-06	8.86837e-06	8.64741e-06
tested gene	sgCTRL	IL7	35	35	35	35	-16.8436	-16.7829	-16.8193	8.50298e-06	8.86837e-06	8.64741e-06
tested gene	sgCTRL	IL9	35	35	35	35	-16.8436	-16.7829	-16.8193	8.50298e-06	8.86837e-06	8.64741e-06
tested gene	sgCTRL	TNFRSF11B	35	35	35	35	-16.8436	-16.7829	-16.8193	8.50298e-06	8.86837e-06	8.64741e-06
tested gene	sgCTRL	XCL1	35	35	35	35	-16.8436	-16.7829	-16.8193	8.50298e-06	8.86837e-06	8.64741e-06
tested gene	sgOGT_v1	ADIPOQ	35	35	35	35	-16.8436	-16.7829	-16.8193	8.50298e-06	8.86837e-06	8.64741e-06
tested gene	sgOGT_v1	CCL11	35	35	35	35	-16.8436	-16.7829	-16.8193	8.50298e-06	8.86837e-06	8.64741e-06
tested gene	sgOGT_v1	CCL8	35	35	35	35	-16.8436	-16.7829	-16.8193	8.50298e-06	8.86837e-06	8.64741e-06
tested gene	sgOGT_v1	FASLG	35	35	35	35	-16.8436	-16.7829	-16.8193	8.50298e-06	8.86837e-06	8.64741e-06
tested gene	sgOGT_v1	IFNA2	35	35	35	35	-16.8436	-16.7829	-16.8193	8.50298e-06	8.86837e-06	8.64741e-06
tested gene	sgOGT_v1	IFNG	35	35	35	35	-16.8436	-16.7829	-16.8193	8.50298e-06	8.86837e-06	8.64741e-06
tested gene	sgOGT_v1	IL11	35	35	35	35	-16.8436	-16.7829	-16.8193	8.50298e-06	8.86837e-06	8.64741e-06
tested gene	sgOGT_v1	IL12B	35	35	35	35	-16.8436	-16.7829	-16.8193	8.50298e-06	8.86837e-06	8.64741e-06
tested gene	sgOGT_v1	IL17A	35	35	35	35	-16.8436	-16.7829	-16.8193	8.50298e-06	8.86837e-06	8.64741e-06
tested gene	sgOGT_v1	IL17F	35	35	35	35	-16.8436	-16.7829	-16.8193	8.50298e-06	8.86837e-06	8.64741e-06
tested gene	sgOGT_v1	IL2	35	35	35	35	-16.8436	-16.7829	-16.8193	8.50298e-06	8.86837e-06	8.64741e-06
tested gene	sgOGT_v1	IL21	35	35	35	35	-16.8436	-16.7829	-16.8193	8.50298e-06	8.86837e-06	8.64741e-06
tested gene	sgOGT_v1	IL3	35	35	35	35	-16.8436	-16.7829	-16.8193	8.50298e-06	8.86837e-06	8.64741e-06
tested gene	sgOGT_v1	IL4	35	35	35	35	-16.8436	-16.7829	-16.8193	8.50298e-06	8.86837e-06	8.64741e-06
tested gene	sgOGT_v1	IL6	35	35	35	35	-16.8436	-16.7829	-16.8193	8.50298e-06	8.86837e-06	8.64741e-06
tested gene	sgOGT_v1	IL7	35	35	35	35	-16.8436	-16.7829	-16.8193	8.50298e-06	8.86837e-06	8.64741e-06
tested gene	sgOGT_v1	IL9	35	35	35	35	-16.8436	-16.7829	-16.8193	8.50298e-06	8.86837e-06	8.64741e-06
tested gene	sgOGT_v1	TNFRSF11B	35	35	35	35	-16.8436	-16.7829	-16.8193	8.50298e-06	8.86837e-06	8.64741e-06
tested gene	sgOGT_v1	XCL1	35	35	35	35	-16.8436	-16.7829	-16.8193	8.50298e-06	8.86837e-06	8.64741e-06
tested gene	sgOGT_v2	ADIPOQ	35	35	35	35	-16.8436	-16.7829	-16.8193	8.50298e-06	8.86837e-06	8.64741e-06
tested gene	sgOGT_v2	IFNA2	35	35	35	35	-16.8436	-16.7829	-16.8193	8.50298e-06	8.86837e-06	8.64741e-06
tested gene	sgOGT_v2	IFNG	35	35	35	35	-16.8436	-16.7829	-16.8193	8.50298e-06	8.86837e-06	8.64741e-06
tested gene	sgOGT_v2	IL12B	35	35	35	35	-16.8436	-16.7829	-16.8193	8.50298e-06	8.86837e-06	8.64741e-06
tested gene	sgOGT_v2	IL17A	35	35	35	35	-16.8436	-16.7829	-16.8193	8.50298e-06	8.86837e-06	8.64741e-06
tested gene	sgOGT_v2	IL17F	35	35	35	35	-16.8436	-16.7829	-16.8193	8.50298e-06	8.86837e-06	8.64741e-06
tested gene	sgOGT_v2	IL2	35	35	35	35	-16.8436	-16.7829	-16.8193	8.50298e-06	8.86837e-06	8.64741e-06
tested gene	sgOGT_v2	IL21	35	35	35	35	-16.8436	-16.7829	-16.8193	8.50298e-06	8.86837e-06	8.64741e-06
tested gene	sgOGT_v2	IL7	35	35	35	35	-16.8436	-16.7829	-16.8193	8.50298e-06	8.86837e-06	8.64741e-06
tested gene	sgOGT_v2	IL9	35	35	35	35	-16.8436	-16.7829	-16.8193	8.50298e-06	8.86837e-06	8.64741e-06
tested gene	sgOGT_v2	TNFRSF11B	35	35	35	35	-16.8436	-16.7829	-16.8193	8.50298e-06	8.86837e-06	8.64741e-06
tested gene	sgOGT_v2	XCL1	35	35	35	35	-16.8436	-16.7829	-16.8193	8.50298e-06	8.86837e-06	8.64741e-06
tested gene	sgOGT_v1	CSF3	35.283	33.837	35.806	34.9753	-16.8189	-15.6199	-17.6253	8.64961e-06	1.98583e-05	4.94602e-06
tested gene	sgCTRL	FASLG	34.789	35	35	34.9297	-16.7733	-16.7829	-16.8193	8.92778e-06	8.86837e-06	8.64741e-06
tested gene	sgOGT_v2	FASLG	35	35	34.784	34.928	-16.7716	-16.7829	-16.6033	8.9381e-06	8.86837e-06	1.0044e-05
tested gene	sgCTRL	ADIPOQ	35	35	34.74	34.9133	-16.7569	-16.7829	-16.5593	9.02943e-06	8.86837e-06	1.03551e-05
tested gene	sgOGT_v1	CCL21	34.167	35	35.487	34.8847	-16.7283	-16.7829	-17.3063	9.21064e-06	8.86837e-06	6.16999e-06
tested gene	sgCTRL	CXCL12	34.39	35	35	34.7967	-16.6403	-16.7829	-16.8193	9.78995e-06	8.86837e-06	8.64741e-06
tested gene	sgOGT_v2	BMP4	35	35	34.19	34.73	-16.5736	-16.7829	-16.0093	1.0253e-05	8.86837e-06	1.51608e-05
tested gene	sgCTRL	CX3CL1	34.848	34.408	34.725	34.6603	-16.5039	-16.1909	-16.5443	1.07602e-05	1.33676e-05	1.04633e-05
tested gene	sgOGT_v2	CCL8	35	33.959	35	34.653	-16.4966	-15.7419	-16.8193	1.08151e-05	1.8248e-05	8.64741e-06
tested gene	sgOGT_v1	THPO	33.955	35	35	34.6517	-16.4953	-16.7829	-16.8193	1.0825e-05	8.86837e-06	8.64741e-06
tested gene	sgCTRL	CXCL1	33.009	35	35.838	34.6157	-16.4593	-16.7829	-17.6573	1.10986e-05	8.86837e-06	4.83752e-06
tested gene	sgOGT_v1	CD40LG	34.865	34.132	34.772	34.5897	-16.4333	-15.9149	-16.5913	1.13004e-05	1.61859e-05	1.01279e-05
tested gene	sgOGT_v1	CXCL11	33.669	35	35	34.5563	-16.3999	-16.7829	-16.8193	1.15645e-05	8.86837e-06	8.64741e-06
tested gene	sgOGT_v2	CCL19	35	35	33.623	34.541	-16.3846	-16.7829	-15.4423	1.16881e-05	8.86837e-06	2.24597e-05
tested gene	sgOGT_v1	CXCL10	35	33.591	35	34.5303	-16.3739	-15.3739	-16.8193	1.17748e-05	2.35502e-05	8.64741e-06
tested gene	sgCTRL	TNFRSF11B	33.515	36.299	33.738	34.5173	-16.3609	-18.0819	-15.5573	1.18814e-05	3.60417e-06	2.07389e-05
tested gene	sgCTRL	CXCL9	37.333	33.099	33.054	34.4953	-16.3389	-14.8819	-14.8733	1.2064e-05	3.31209e-05	3.33189e-05
tested gene	sgCTRL	IL12A	35	35	33.461	34.487	-16.3306	-16.7829	-15.2803	1.21339e-05	8.86837e-06	2.51288e-05
tested gene	sgOGT_v2	IL11	35	35	33.375	34.4583	-16.3019	-16.7829	-15.1943	1.23774e-05	8.86837e-06	2.66723e-05
tested gene	sgOGT_v1	CCL19	35	33.332	35	34.444	-16.2876	-15.1149	-16.8193	1.2501e-05	2.81813e-05	8.64741e-06
tested gene	sgOGT_v2	CD40LG	34.35	33.923	35	34.4243	-16.2679	-15.7059	-16.8193	1.26726e-05	1.87091e-05	8.64741e-06
tested gene	sgCTRL	CCL19	34.198	35	33.666	34.288	-16.1316	-16.7829	-15.4853	1.39285e-05	8.86837e-06	2.18002e-05
tested gene	sgOGT_v2	CX3CL1	33.415	34.394	34.741	34.1833	-16.0269	-16.1769	-16.5603	1.49766e-05	1.34979e-05	1.03479e-05
tested gene	sgOGT_v2	CXCL12	35	35	32.496	34.1653	-16.0089	-16.7829	-14.3153	1.51646e-05	8.86837e-06	4.9053e-05
tested gene	sgOGT_v2	CCL21	32.191	35	35.241	34.144	-15.9876	-16.7829	-17.0603	1.53905e-05	8.86837e-06	7.31708e-06
tested gene	sgCTRL	IL11	35	35	32.34	34.1133	-15.9569	-16.7829	-14.1593	1.57212e-05	8.86837e-06	5.46545e-05
tested gene	sgCTRL	IL15	35	32.301	35	34.1003	-15.9439	-14.0839	-16.8193	1.58635e-05	5.75869e-05	8.64741e-06
tested gene	sgOGT_v1	IL12A	35	35	31.715	33.905	-15.7486	-16.7829	-13.5343	1.81635e-05	8.86837e-06	8.42888e-05
tested gene	sgCTRL	IL27	33.45	33.86	34.264	33.858	-15.7016	-15.6429	-16.0833	1.87649e-05	1.95442e-05	1.44027e-05
tested gene	sgOGT_v1	CXCL12	35.583	32.188	33.778	33.8497	-15.6933	-13.9709	-15.5973	1.88737e-05	6.22788e-05	2.01718e-05
tested gene	sgCTRL	IL6	35	33.183	33.293	33.8253	-15.6689	-14.9659	-15.1123	1.91947e-05	3.12475e-05	2.82322e-05
tested gene	sgOGT_v2	IL27	33.478	33.558	34.263	33.7663	-15.6099	-15.3409	-16.0823	1.99959e-05	2.40951e-05	1.44127e-05
tested gene	sgOGT_v1	CXCL1	32.84	32.813	35.564	33.739	-15.5826	-14.5959	-17.3833	2.03784e-05	4.03828e-05	5.84932e-06
tested gene	sgCTRL	CCL21	33.581	33.602	33.945	33.7093	-15.5529	-15.3849	-15.7643	2.08018e-05	2.33713e-05	1.79669e-05
tested gene	sgOGT_v1	IL27	34.448	33.099	33.513	33.6867	-15.5303	-14.8819	-15.3323	2.11312e-05	3.31209e-05	2.42392e-05
tested gene	sgCTRL	CXCL10	32.324	33.559	35	33.6277	-15.4713	-15.3419	-16.8193	2.20133e-05	2.40784e-05	8.64741e-06
tested gene	sgOGT_v2	CXCL9	31.858	37.216	31.672	33.582	-15.4256	-18.9989	-13.4913	2.27212e-05	1.9088e-06	8.68388e-05
tested gene	sgCTRL	THPO	32.647	34.429	33.623	33.5663	-15.4099	-16.2119	-15.4423	2.29693e-05	1.31744e-05	2.24597e-05
tested gene	sgCTRL	LTA	33.953	32.925	33.659	33.5123	-15.3559	-14.7079	-15.4783	2.38453e-05	3.73664e-05	2.19062e-05
tested gene	sgOGT_v1	BMP4	31.527	35	33.752	33.4263	-15.2699	-16.7829	-15.5713	2.531e-05	8.86837e-06	2.05387e-05
tested gene	sgOGT_v2	CCL1	33.652	31.533	35	33.395	-15.2386	-13.3159	-16.8193	2.58657e-05	9.80651e-05	8.64741e-06
tested gene	sgCTRL	CSF3	32.198	34.268	33.696	33.3873	-15.2309	-16.0509	-15.5153	2.60035e-05	1.47298e-05	2.13516e-05
tested gene	sgOGT_v2	TGFB2	33.425	33.452	33.153	33.3433	-15.1869	-15.2349	-14.9723	2.68088e-05	2.59321e-05	3.11092e-05
tested gene	sgOGT_v1	LTA	32.674	35	32.314	33.3293	-15.1729	-16.7829	-14.1333	2.70702e-05	8.86837e-06	5.56484e-05
tested gene	sgCTRL	CXCL11	31.917	32.86	35	33.259	-15.1026	-14.6429	-16.8193	2.84226e-05	3.90884e-05	8.64741e-06
tested gene	sgOGT_v2	IL5	32.322	35	32.313	33.2117	-15.0553	-16.7829	-14.1323	2.93706e-05	8.86837e-06	5.5687e-05
tested gene	sgCTRL	CCL1	32.349	32.171	35	33.1733	-15.0169	-13.9539	-16.8193	3.01615e-05	6.30169e-05	8.64741e-06
tested gene	sgCTRL	CXCL5	32.707	33.327	33.203	33.079	-14.9226	-15.1099	-15.0223	3.21995e-05	2.82792e-05	3.00495e-05
tested gene	sgOGT_v2	IL12A	32.499	31.413	35.162	33.0247	-14.8683	-13.1959	-16.9813	3.34353e-05	0.000106571	7.72894e-06
tested gene	sgOGT_v1	CXCL13	32.629	34.194	32.195	33.006	-14.8496	-15.9769	-14.0143	3.38707e-05	1.55051e-05	6.04332e-05
tested gene	sgOGT_v1	IL5	33.33	31.641	33.954	32.975	-14.8186	-13.4239	-15.7733	3.46064e-05	9.0992e-05	1.78552e-05
tested gene	sgOGT_v2	NODAL	32.63	32.81	33.413	32.951	-14.7946	-14.5929	-15.2323	3.51869e-05	4.04668e-05	2.59789e-05
tested gene	sgCTRL	PPBP	32.31	33.419	32.617	32.782	-14.6256	-15.2019	-14.4363	3.95599e-05	2.65322e-05	4.51066e-05
tested gene	sgOGT_v1	NODAL	32.695	32.908	32.483	32.6953	-14.5389	-14.6909	-14.3023	4.20092e-05	3.78093e-05	4.94969e-05
tested gene	sgOGT_v2	CXCL5	32.272	33.418	32.247	32.6457	-14.4893	-15.2009	-14.0663	4.34807e-05	2.65505e-05	5.82937e-05
tested gene	sgOGT_v1	IL15	33.92	31.697	32.263	32.6267	-14.4703	-13.4799	-14.0823	4.40571e-05	8.75277e-05	5.76508e-05
tested gene	sgOGT_v2	MSTN	32.413	32.409	33.045	32.6223	-14.4659	-14.1919	-14.8643	4.41896e-05	5.34333e-05	3.35274e-05
tested gene	sgCTRL	CD40LG	32.63	32.988	31.782	32.4667	-14.3103	-14.7709	-13.6013	4.92244e-05	3.57698e-05	8.04639e-05
tested gene	sgCTRL	BMP4	32.372	32.226	32.677	32.425	-14.2686	-14.0089	-14.4963	5.06668e-05	6.06597e-05	4.32693e-05
tested gene	sgCTRL	OSM	32.797	30.968	33.163	32.3093	-14.1529	-12.7509	-14.9823	5.48962e-05	0.000145076	3.08943e-05
tested gene	sgOGT_v2	CXCL11	30.551	34.927	31.184	32.2207	-14.0643	-16.7099	-13.0033	5.83759e-05	9.32866e-06	0.000121791
tested gene	sgOGT_v2	CCL17	32.377	31.232	33.017	32.2087	-14.0523	-13.0149	-14.8363	5.88635e-05	0.000120816	3.41845e-05
tested gene	sgCTRL	MSTN	31.981	32.55	32.04	32.1903	-14.0339	-14.3329	-13.8593	5.96163e-05	4.84582e-05	6.72875e-05
tested gene	sgOGT_v1	CXCL5	33.099	31.452	31.875	32.142	-13.9856	-13.2349	-13.6943	6.16474e-05	0.000103729	7.54406e-05
tested gene	sgOGT_v2	BMP6	30.98	33.72	31.43	32.0433	-13.8869	-15.5029	-13.2493	6.6011e-05	2.15358e-05	0.000102698
tested gene	sgOGT_v2	CXCL13	32.43	31.746	31.78	31.9853	-13.8289	-13.5289	-13.5993	6.87189e-05	8.46048e-05	8.05754e-05
tested gene	sgOGT_v1	CCL20	31.121	32.617	31.775	31.8377	-13.6813	-14.3999	-13.5943	7.61252e-05	4.62592e-05	8.08552e-05
tested gene	sgCTRL	LIF	31.877	31.787	31.742	31.802	-13.6456	-13.5699	-13.5613	7.80306e-05	8.22343e-05	8.27259e-05
tested gene	sgOGT_v1	LIF	31.432	30.598	32.821	31.617	-13.4606	-12.3809	-14.6403	8.87066e-05	0.00018749	3.91589e-05
tested gene	sgOGT_v1	CX3CL1	32.952	30.531	31.098	31.527	-13.3706	-12.3139	-12.9173	9.44166e-05	0.000196402	0.000129272
tested gene	sgCTRL	TGFB2	31.224	30.641	32.606	31.4903	-13.3339	-12.4239	-14.4253	9.6847e-05	0.000181984	4.54519e-05
tested gene	sgCTRL	IL5	29.935	31.907	32.459	31.4337	-13.2773	-13.6899	-14.2783	0.000100727	7.5671e-05	5.03273e-05
tested gene	sgOGT_v1	TGFB2	31.103	31.711	31.262	31.3587	-13.2023	-13.4939	-13.0813	0.000106102	8.66825e-05	0.000115382
tested gene	sgCTRL	CCL20	31.618	31.408	30.968	31.3313	-13.1749	-13.1909	-12.7873	0.000108131	0.000106941	0.000141462
tested gene	sgOGT_v1	CCL17	31.615	30.402	31.122	31.0463	-12.8899	-12.1849	-12.9413	0.000131748	0.000214773	0.00012714
tested gene	sgOGT_v2	IL15	30.633	30.552	31.736	30.9737	-12.8173	-12.3349	-13.5553	0.000138554	0.000193564	8.30707e-05
tested gene	sgOGT_v1	OSM	30.381	30.942	31.116	30.813	-12.6566	-12.7249	-12.9353	0.000154876	0.000147715	0.000127669
tested gene	sgOGT_v1	CXCL2	30.628	31.173	30.556	30.7857	-12.6293	-12.9559	-12.3753	0.000157838	0.000125859	0.000188219
tested gene	sgCTRL	NODAL	30.102	30.855	31.374	30.777	-12.6206	-12.6379	-13.1933	0.000158789	0.000156896	0.000106763
tested gene	sgOGT_v2	LTA	30.953	30.968	30.214	30.7117	-12.5553	-12.7509	-12.0333	0.000166145	0.000145076	0.00023857
tested gene	sgCTRL	CCL17	31.529	30.458	29.987	30.658	-12.5016	-12.2409	-11.8063	0.000172442	0.000206596	0.000279222
tested gene	sgCTRL	CXCL2	30.871	30.496	30.456	30.6077	-12.4513	-12.2789	-12.2753	0.000178565	0.000201225	0.000201728
tested gene	sgOGT_v2	CXCL1	30.142	31.093	30.452	30.5623	-12.4059	-12.8759	-12.2713	0.000184265	0.000133036	0.000202288
tested gene	sgOGT_v1	CCL1	30.884	30.359	30.135	30.4593	-12.3029	-12.1419	-11.9543	0.000197901	0.000221271	0.000251998
tested gene	sgOGT_v1	CCL13	30.219	30.39	30.318	30.309	-12.1526	-12.1729	-12.1373	0.000219636	0.000216567	0.000221977
tested gene	sgCTRL	BMP6	30.514	29.709	30.117	30.1133	-11.9569	-11.4919	-11.9363	0.000251538	0.000347211	0.000255162
tested gene	sgOGT_v2	OSM	30.273	29.751	29.93	29.9847	-11.8283	-11.5339	-11.7493	0.000275003	0.000337249	0.000290475
tested gene	sgOGT_v1	BMP6	29.733	29.789	29.413	29.645	-11.4886	-11.5719	-11.2323	0.000348006	0.000328482	0.000415662
tested gene	sgOGT_v2	CCL20	29.474	29.837	29.581	29.6307	-11.4743	-11.6199	-11.4003	0.000351481	0.000317732	0.000369971
tested gene	sgCTRL	CXCL13	29.751	29.769	29.289	29.603	-11.4466	-11.5519	-11.1083	0.000358286	0.000333067	0.000452969
tested gene	sgOGT_v2	TNFSF10	29.422	29.26	29.756	29.4793	-11.3229	-11.0429	-11.5753	0.000390353	0.000473975	0.000327708
tested gene	sgCTRL	IL23A	29.655	29.242	29.206	29.3677	-11.2113	-11.0249	-11.0253	0.000421767	0.000479926	0.000479793
tested gene	sgOGT_v2	CCL24	29.243	29.473	29.298	29.338	-11.1816	-11.2559	-11.1173	0.00043053	0.000408918	0.000450152
tested gene	sgOGT_v2	CXCL10	29.199	28.701	29.545	29.1483	-10.9919	-10.4839	-11.3643	0.000491019	0.000698283	0.000379319
tested gene	sgOGT_v2	IL6	28.747	28.844	29.51	29.0337	-10.8773	-10.6269	-11.3293	0.000531639	0.000632389	0.000388634
tested gene	sgCTRL	IL10	28.702	29.26	29.125	29.029	-10.8726	-11.0429	-10.9443	0.000533361	0.000473975	0.000507502
tested gene	sgOGT_v2	CNTF	29.179	28.991	28.911	29.027	-10.8706	-10.7739	-10.7303	0.000534101	0.000571128	0.000588651
tested gene	sgOGT_v2	BMP2	28.694	29.261	29.106	29.0203	-10.8639	-11.0439	-10.9253	0.000536575	0.000473647	0.000514229
tested gene	sgCTRL	IL1A	28.715	28.741	29.445	28.967	-10.8106	-10.5239	-11.2643	0.000556782	0.000679189	0.000406544
tested gene	sgOGT_v1	IL23A	28.571	28.757	29.384	28.904	-10.7476	-10.5399	-11.2033	0.000581634	0.000671698	0.000424102
tested gene	sgOGT_v1	CNTF	28.901	28.906	28.886	28.8977	-10.7413	-10.6889	-10.7053	0.000584193	0.000605788	0.00059894
tested gene	sgOGT_v2	CCL13	28.842	28.383	29.284	28.8363	-10.6799	-10.1659	-11.1033	0.000609565	0.000870481	0.000454541
tested gene	sgOGT_v1	BMP2	28.531	28.597	29.325	28.8177	-10.6613	-10.3799	-11.1443	0.000617503	0.000750479	0.000441806
tested gene	sgCTRL	TNFSF10	28.455	28.945	28.636	28.6787	-10.5223	-10.7279	-10.4553	0.000679958	0.000589631	0.000712264
tested gene	sgOGT_v2	LIF	28.948	28.606	28.302	28.6187	-10.4623	-10.3889	-10.1213	0.000708833	0.000745812	0.000897811
tested gene	sgOGT_v1	IL10	28.691	28.554	28.58	28.6083	-10.4519	-10.3369	-10.3993	0.000713928	0.000773184	0.000740455
tested gene	sgOGT_v2	LTB	28.721	28.702	28.298	28.5737	-10.4173	-10.4849	-10.1173	0.000731291	0.0006978	0.000900304
tested gene	sgOGT_v2	IL23A	28.489	28.544	28.652	28.5617	-10.4053	-10.3269	-10.4713	0.000737399	0.000778562	0.000704408
tested gene	sgCTRL	IL8	28.166	28.96	28.454	28.5267	-10.3703	-10.7429	-10.2733	0.000755507	0.000583533	0.000808032
tested gene	sgCTRL	CCL7	28.448	28.643	28.466	28.519	-10.3626	-10.4259	-10.2853	0.000759533	0.000726928	0.000801339
tested gene	sgCTRL	IL24	28.48	28.255	28.697	28.4773	-10.3209	-10.0379	-10.5163	0.000781789	0.000951242	0.000682776
tested gene	sgOGT_v1	LTB	28.479	28.435	28.301	28.405	-10.2486	-10.2179	-10.1203	0.000821985	0.000839664	0.000898434
tested gene	sgCTRL	LTB	28.513	28.566	27.971	28.35	-10.1936	-10.3489	-9.7903	0.000853926	0.00076678	0.00112934
tested gene	sgOGT_v1	TNFSF13B	28.333	28.145	28.18	28.2193	-10.0629	-9.9279	-9.9993	0.000934878	0.00102661	0.000977036
tested gene	sgCTRL	CNTF	28.165	27.966	28.322	28.151	-9.9946	-9.7489	-10.1413	0.000980224	0.00116222	0.000885451
tested gene	sgCTRL	BMP2	27.903	28.003	28.285	28.0637	-9.90727	-9.7859	-10.1043	0.0010414	0.00113279	0.000908453
tested gene	sgCTRL	TNF	27.753	28.129	27.943	27.9417	-9.78527	-9.9119	-9.7623	0.00113329	0.00103806	0.00115148
tested gene	sgOGT_v2	IL10	27.888	28.29	27.612	27.93	-9.7736	-10.0729	-9.4313	0.00114249	0.000928442	0.00144842
tested gene	sgOGT_v2	CXCL2	27.759	27.974	27.564	27.7657	-9.60927	-9.7569	-9.3833	0.00128033	0.00115579	0.00149743
tested gene	sgOGT_v1	IL1A	27.85	27.299	27.678	27.609	-9.4526	-9.0819	-9.4973	0.0014272	0.00184534	0.00138366
tested gene	sgOGT_v1	CCL18	27.676	27.513	27.538	27.5757	-9.41927	-9.2959	-9.3573	0.00146056	0.00159094	0.00152466
tested gene	sgCTRL	TNFSF13B	27.664	27.566	27.313	27.5143	-9.35793	-9.3489	-9.1323	0.00152399	0.00153356	0.00178198
tested gene	sgOGT_v2	TNFSF13B	27.542	27.625	27.352	27.5063	-9.34993	-9.4079	-9.1713	0.00153246	0.00147211	0.00173446
tested gene	sgOGT_v2	IL24	27.382	27.381	27.386	27.383	-9.2266	-9.1639	-9.2053	0.00166923	0.00174338	0.00169406
tested gene	sgCTRL	C5	27.214	26.902	27.275	27.1303	-8.97393	-8.6849	-9.0943	0.00198873	0.00242988	0.00182954
tested gene	sgOGT_v1	IL24	27.353	26.998	26.972	27.1077	-8.95127	-8.7809	-8.7913	0.00202023	0.00227345	0.00225712
tested gene	sgCTRL	IL1B	26.967	27.21	26.811	26.996	-8.8396	-8.9929	-8.6303	0.00218281	0.00196276	0.0025236
tested gene	sgOGT_v2	IL16	26.888	26.96	26.909	26.919	-8.7626	-8.7429	-8.7283	0.00230247	0.00233413	0.00235787
tested gene	sgCTRL	CCL3	26.645	26.706	26.72	26.6903	-8.53393	-8.4889	-8.5393	0.00269793	0.00278347	0.00268791
tested gene	sgOGT_v1	PPBP	26.459	26.823	26.686	26.656	-8.4996	-8.6059	-8.5053	0.0027629	0.00256665	0.00275201
tested gene	sgOGT_v2	IL1A	26.476	26.946	26.279	26.567	-8.4106	-8.7289	-8.0983	0.00293871	0.00235689	0.00364896
tested gene	sgOGT_v2	CCL18	26.382	26.63	26.529	26.5137	-8.35727	-8.4129	-8.3483	0.00304938	0.00293403	0.0030684
tested gene	sgOGT_v1	TNF	26.367	26.467	26.612	26.482	-8.3256	-8.2499	-8.4313	0.00311706	0.00328498	0.00289685
tested gene	sgOGT_v1	IL1B	26.432	26.402	26.534	26.456	-8.2996	-8.1849	-8.3533	0.00317374	0.00343637	0.00305778
tested gene	sgOGT_v1	TNFSF10	26.532	26.364	26.289	26.395	-8.2386	-8.1469	-8.1083	0.00331081	0.00352808	0.00362375
tested gene	sgOGT_v1	C5	26.574	26.361	26.128	26.3543	-8.19793	-8.1439	-7.9473	0.00340546	0.00353543	0.00405158
tested gene	sgOGT_v2	C5	26.006	26.624	25.913	26.181	-8.0246	-8.4069	-7.7323	0.00384021	0.00294626	0.00470268
tested gene	sgOGT_v1	IL16	26.241	25.902	25.979	26.0407	-7.88427	-7.6849	-7.7983	0.00423252	0.00485976	0.00449239
tested gene	sgOGT_v2	PPBP	25.92	26.122	25.96	26.0007	-7.84427	-7.9049	-7.7793	0.00435152	0.00417242	0.00455195
tested gene	sgOGT_v1	BMP7	26.168	25.871	25.945	25.9947	-7.83827	-7.6539	-7.7643	0.00436965	0.00496531	0.00459952
tested gene	sgCTRL	CCL13	25.884	25.918	25.723	25.8417	-7.68527	-7.7009	-7.5423	0.00485852	0.00480616	0.00536465
tested gene	sgOGT_v1	VEGFA	25.847	25.469	25.814	25.71	-7.5536	-7.2519	-7.6333	0.0053228	0.00656086	0.00503672
tested gene	sgCTRL	BMP7	25.645	25.862	25.589	25.6987	-7.54227	-7.6449	-7.4083	0.00536477	0.00499639	0.0058868
tested gene	sgOGT_v1	CCL24	25.614	25.608	25.584	25.602	-7.4456	-7.3909	-7.4033	0.00573655	0.00595823	0.00590724
tested gene	sgOGT_v1	CCL7	25.652	25.451	25.537	25.5467	-7.39027	-7.2339	-7.3563	0.00596085	0.00664323	0.00610285
tested gene	sgCTRL	CXCL16	25.602	25.337	25.671	25.5367	-7.38027	-7.1199	-7.4903	0.00600231	0.00718946	0.00556154
tested gene	sgOGT_v2	IL1B	25.154	25.624	25.352	25.3767	-7.22027	-7.4069	-7.1713	0.0067063	0.00589252	0.00693783
tested gene	sgOGT_v2	BMP7	25.46	25.393	25.23	25.361	-7.2046	-7.1759	-7.0493	0.00677953	0.00691574	0.00755004
tested gene	sgCTRL	IL16	25.424	25.444	25.196	25.3547	-7.19827	-7.2269	-7.0153	0.00680935	0.00667554	0.00773009
tested gene	sgOGT_v1	IL8	25.479	25.138	25.258	25.2917	-7.13527	-6.9209	-7.0773	0.00711329	0.0082528	0.00740492
tested gene	sgOGT_v1	CCL3	25.43	25.16	25.255	25.2817	-7.12527	-6.9429	-7.0743	0.00716277	0.00812791	0.00742034
tested gene	sgOGT_v2	TNF	24.512	24.857	24.681	24.6833	-6.52693	-6.6399	-6.5003	0.0108442	0.0100275	0.0110462
tested gene	sgOGT_v2	CXCL16	24.666	24.671	24.604	24.647	-6.4906	-6.4539	-6.4233	0.0111208	0.0114073	0.0116518
tested gene	sgCTRL	IL18	24.595	24.583	24.582	24.5867	-6.43027	-6.3659	-6.4013	0.0115957	0.0121248	0.0118309
tested gene	sgCTRL	VEGFA	24.279	24.192	24.293	24.2547	-6.09827	-5.9749	-6.1123	0.0145962	0.0158992	0.0144549
tested gene	sgOGT_v2	IL18	24.228	24.213	24.256	24.2323	-6.07593	-5.9959	-6.0753	0.0148239	0.0156695	0.0148304
tested gene	sgOGT_v2	CCL7	23.99	24.239	23.971	24.0667	-5.91027	-6.0219	-5.7903	0.0166277	0.0153896	0.0180695
tested gene	sgOGT_v2	CCL3	23.956	24.206	23.882	24.0147	-5.85827	-5.9889	-5.7013	0.017238	0.0157457	0.0192193
tested gene	sgOGT_v1	IL18	23.953	23.784	23.875	23.8707	-5.71427	-5.5669	-5.6943	0.0190473	0.0210958	0.0193128
tested gene	sgCTRL	CCL2	23.74	23.819	23.837	23.7987	-5.64227	-5.6019	-5.6563	0.020022	0.0205902	0.0198282
tested gene	sgOGT_v2	IL8	23.827	23.916	23.632	23.7917	-5.63527	-5.6989	-5.4513	0.0201194	0.0192513	0.0228557
tested gene	sgOGT_v1	CXCL16	23.746	23.592	23.677	23.6717	-5.51527	-5.3749	-5.4963	0.0218645	0.0240987	0.0221538
tested gene	sgCTRL	CSF1	23.479	23.566	23.426	23.4903	-5.33393	-5.3489	-5.2453	0.0247928	0.024537	0.0263637
tested gene	sgOGT_v1	CCL2	23.303	23.169	23.698	23.39	-5.2336	-4.9519	-5.5173	0.0265784	0.0323094	0.0218337
tested gene	sgOGT_v2	VEGFA	23.242	23.456	23.178	23.292	-5.1356	-5.2389	-4.9973	0.0284466	0.026481	0.0313085
tested gene	sgCTRL	CCL18	23.172	23.201	23.172	23.1817	-5.02527	-4.9839	-4.9913	0.0307075	0.0316007	0.031439
tested gene	sgCTRL	CCL24	23.139	22.911	22.948	22.9993	-4.84293	-4.6939	-4.7673	0.0348443	0.0386363	0.0367197
tested gene	sgCTRL	CCL22	22.347	22.14	22.15	22.2123	-4.05593	-3.9229	-3.9693	0.0601233	0.065931	0.0638442
tested gene	sgOGT_v2	CCL2	21.836	21.986	21.932	21.918	-3.7616	-3.7689	-3.7513	0.0737302	0.0733581	0.0742585
tested gene	sgOGT_v1	CSF1	21.721	21.545	21.545	21.6037	-3.44727	-3.3279	-3.3643	0.0916789	0.0995869	0.0971057
tested gene	sgCTRL	IL1RN	21.416	21.477	21.442	21.445	-3.2886	-3.2599	-3.2613	0.102337	0.104393	0.104292
tested gene	sgCTRL	MIF	21.321	21.218	21.21	21.2497	-3.09327	-3.0009	-3.0293	0.117175	0.124922	0.122487
tested gene	sgOGT_v2	GPI	20.996	21.238	20.877	21.037	-2.8806	-3.0209	-2.6963	0.135785	0.123202	0.154288
tested gene	sgOGT_v2	CCL22	20.758	20.971	20.702	20.8103	-2.65393	-2.7539	-2.5213	0.158886	0.14825	0.174186
tested gene	sgOGT_v2	CSF1	20.719	20.967	20.659	20.7817	-2.62527	-2.7499	-2.4783	0.162075	0.148661	0.179456
tested gene	sgCTRL	GPI	20.792	20.79	20.755	20.779	-2.6226	-2.5729	-2.5743	0.162375	0.168066	0.167903
tested gene	sgOGT_v2	MIF	20.773	20.877	20.53	20.7267	-2.57027	-2.6599	-2.3493	0.168373	0.15823	0.196241
tested gene	sgOGT_v2	IL1RN	20.585	20.63	20.498	20.571	-2.4146	-2.4129	-2.3173	0.187557	0.187778	0.200643
tested gene	sgOGT_v1	GPI	20.643	20.365	20.389	20.4657	-2.30927	-2.1479	-2.2083	0.201763	0.225641	0.216389
tested gene	sgOGT_v1	MIF	20.096	19.918	19.98	19.998	-1.8416	-1.7009	-1.7993	0.279012	0.307594	0.287314
tested gene	sgOGT_v1	CCL22	19.539	19.456	19.393	19.4627	-1.30627	-1.2389	-1.2123	0.404366	0.423696	0.43158
tested gene	sgOGT_v1	IL1RN	18.859	18.869	18.924	18.884	-0.7276	-0.6519	-0.7433	0.603908	0.636442	0.597371
tested gene	sgCTRL	SPP1	18.714	18.724	18.532	18.6567	-0.500267	-0.506901	-0.3513	0.706976	0.703732	0.783878
tested gene	sgOGT_v2	CCL5	17.823	17.878	17.665	17.7887	0.367733	0.3391	0.515699	1.29032	1.26497	1.42969
tested gene	sgOGT_v2	SPP1	17.509	17.695	17.494	17.566	0.5904	0.5221	0.6867	1.50566	1.43604	1.6096
tested gene	sgCTRL	CCL5	17.254	17.265	17.171	17.23	0.9264	0.952101	1.0097	1.90053	1.93469	2.01349
tested gene	sgOGT_v1	SPP1	17.115	16.961	17.004	17.0267	1.12973	1.2561	1.1767	2.18818	2.38849	2.26059
tested gene	sgOGT_v1	CCL5	16.864	16.745	16.812	16.807	1.3494	1.4721	1.3687	2.54806	2.77425	2.58238
genomic DNA control	sgCTRL	GDC	35	35	35
genomic DNA control	sgOGT_v1	GDC	35	35	35
genomic DNA control	sgOGT_v2	GDC	35	35	35
houskeeping control	sgCTRL	ACTB	14.924	14.946	14.941
houskeeping control	sgCTRL	B2M	16.244	16.168	16.237
houskeeping control	sgCTRL	GAPDH	17.654	17.656	17.587
houskeeping control	sgCTRL	HPRT1	25.188	25.372	25.232
houskeeping control	sgCTRL	RPLP0	16.159	16.145	16.126
houskeeping control	sgOGT_v1	ACTB	15.133	15.054	15.266
houskeeping control	sgOGT_v1	B2M	16.697	16.836	16.778
houskeeping control	sgOGT_v1	GAPDH	17.38	17.236	17.368
houskeeping control	sgOGT_v1	HPRT1	24.944	25.022	25.128
houskeeping control	sgOGT_v1	RPLP0	16.684	16.681	16.671
houskeeping control	sgOGT_v2	ACTB	15.473	15.716	15.569
houskeeping control	sgOGT_v2	B2M	16.138	16.411	16.3
houskeeping control	sgOGT_v2	GAPDH	17.497	17.473	17.417
houskeeping control	sgOGT_v2	HPRT1	25.174	25.568	25.266
houskeeping control	sgOGT_v2	RPLP0	16.442	16.5	16.45
PCR positive control	sgCTRL	PPC	20.689	21.55	20.968
PCR positive control	sgCTRL	PPC	20.831	21.621	21.343
PCR positive control	sgCTRL	PPC	20.9	21.567	21.501
PCR positive control	sgOGT_v1	PPC	20.988	21.85	21.85
PCR positive control	sgOGT_v1	PPC	20.918	21.786	22.203
PCR positive control	sgOGT_v1	PPC	21.059	21.656	22.036
PCR positive control	sgOGT_v2	PPC	21.453	20.656	20.833
PCR positive control	sgOGT_v2	PPC	21.564	20.729	21.574
PCR positive control	sgOGT_v2	PPC	21.48	20.728	21.61
RT control	sgCTRL	RTC	20.65	20.728	20.681
RT control	sgCTRL	RTC	20.691	21.521	20.707
RT control	sgCTRL	RTC	20.767	20.716	20.726
RT control	sgOGT_v1	RTC	20.799	20.84	20.692
RT control	sgOGT_v1	RTC	20.794	20.73	20.636
RT control	sgOGT_v1	RTC	20.872	20.788	20.765
RT control	sgOGT_v2	RTC	20.696	20.912	20.604
RT control	sgOGT_v2	RTC	20.714	20.913	20.628
RT control	sgOGT_v2	RTC	20.708	20.911	20.659

## Sheet: assay controls
			Rep 1	Rep 2	Rep 3
genomic DNA ctrl	GDC		UD	UD	UD	> value is greater than 35 indicates gDNA contamination is too low to affect gene expression
Reverse Transcriptase	dRTC		-0.426583	-0.422833	-0.84875	> value is less than 5 indicates no inhibition of RT reaction is apparent
	Avg CT, RTC		20.7718	20.841	20.6958
Positive PCR Ctrl	Avg CT, PPC		21.1984	21.2638	21.5445	> value should be 20 +/- 2 on each RT2 Array and should not vary by more than 2 cycles between Arrays being compared
House Keeping Group	Avg CT, HKG		18.1564	18.2171	18.1807
